# Supplementary material
Source: publisher site journal article supplement (https://www.dovepress.com/get_supplementary_file.php?f=287931-Table-S1.xlsx)
Supplement: Supplementary file 1 [file get_supplementary_file.php]

## Sheet: BP terms
Sheet 1. 408 terms of biological process (BP)
ID	Description	GeneRatio	BgRatio	pvalue	p.adjust	qvalue	geneID	Count
GO:0002446	neutrophil mediated immunity	87/1281	499/18493	7.91747e-16	1.62369e-12	1.42518e-12	GUSB/TXNDC5/DDOST/PSMC2/GLA/CANT1/GLB1/CMTM6/CD63/HEXB/PRDX4/CKAP4/ANXA2/SURF4/PYGL/GALNS/PGM2/GRN/S100A11/PSMA2/NCSTN/RAP1B/CTSA/GNS/PLAU/RAP2B/ERP44/PTX3/ADGRE5/MAN2B1/GGH/IQGAP1/COPB1/BRI3/B2M/PLAUR/CD58/MAGT1/TMEM179B/IDH1/PPIA/WDR1/ARPC5/CHI3L1/DSN1/IRAK4/FUCA2/NRAS/RAB27A/MMP9/CD93/LGALS3/HEBP2/NPC2/CTSB/DIAPH1/CSTB/TNFAIP6/TUBB/PNP/PSMA5/CTSC/DEGS1/COTL1/SDCBP/IQGAP2/CLEC5A/GSDMD/NFKB1/VAT…	87
GO:0006260	DNA replication	59/1281	268/18493	1.05413e-15	1.62369e-12	1.42518e-12	RFC2/CDK2/PCNA/MGME1/GINS4/SSBP1/RBBP8/S100A11/MCM3/HUS1/POLD3/MCM2/RPA3/MCM5/E2F7/MCM6/TIPIN/CHEK2/FAM111A/RNASEH2A/CHEK1/RBMS1/GRWD1/TIMELESS/E2F8/CCNA2/POLA2/GINS2/BRCA1/RRM2/GINS1/CDC6/RFWD3/LRWD1/ORC5/SMARCAL1/DNAJC2/POLD1/PRIM2/RAD51/POLE2/ORC1/PCLAF/CDC42/DBF4/DSCC1/POLD2/RFC4/EXO1/ALYREF/RPA1/WDHD1/RRM1/MCM8/CDK1/FBXO5/ZMPSTE24/CDC45/SLBP	59
GO:0030198	extracellular matrix organization	69/1281	348/18493	1.17855e-15	1.62369e-12	1.42518e-12	PLOD3/SERPINH1/COLGALT1/LAMC1/PLOD1/MMP14/PRDX4/BMP1/ANXA2/COL4A2/ADAM12/COL4A1/TIMP1/ITGB1/ANXA2P2/ITGA5/EMILIN1/PDPN/MMP2/FN1/COL1A2/BGN/PTX3/BCL3/TNFRSF1A/COL5A2/LOX/COL6A2/HSPG2/COL6A1/ENG/COL3A1/EFEMP2/P3H4/MMP11/COL1A1/LOXL3/LOXL2/TNC/ELN/F11R/MMP9/MPV17/LAMB2/FMOD/OLFML2A/ADAMTSL4/COL5A1/ITGB3/TGFBI/CTSL/ITGA4/TNFRSF11B/LAMA4/SERPINE1/PLOD2/LAMB1/HPSE2/POSTN/ICAM3/LUM/SH3PXD2B/NID2/TGFBR1/…	69
GO:0043312	neutrophil degranulation	85/1281	485/18493	1.25874e-15	1.62369e-12	1.42518e-12	GUSB/TXNDC5/DDOST/PSMC2/GLA/CANT1/GLB1/CMTM6/CD63/HEXB/PRDX4/CKAP4/ANXA2/SURF4/PYGL/GALNS/PGM2/GRN/S100A11/PSMA2/NCSTN/RAP1B/CTSA/GNS/PLAU/RAP2B/ERP44/PTX3/ADGRE5/MAN2B1/GGH/IQGAP1/COPB1/BRI3/B2M/PLAUR/CD58/MAGT1/TMEM179B/IDH1/PPIA/ARPC5/CHI3L1/DSN1/FUCA2/NRAS/RAB27A/MMP9/CD93/LGALS3/HEBP2/NPC2/CTSB/DIAPH1/CSTB/TNFAIP6/TUBB/PNP/PSMA5/CTSC/DEGS1/COTL1/SDCBP/IQGAP2/CLEC5A/GSDMD/NFKB1/VAT1/RHOA/ANO6…	85
GO:0002283	neutrophil activation involved in immune response	85/1281	488/18493	1.82778e-15	1.62369e-12	1.42518e-12	GUSB/TXNDC5/DDOST/PSMC2/GLA/CANT1/GLB1/CMTM6/CD63/HEXB/PRDX4/CKAP4/ANXA2/SURF4/PYGL/GALNS/PGM2/GRN/S100A11/PSMA2/NCSTN/RAP1B/CTSA/GNS/PLAU/RAP2B/ERP44/PTX3/ADGRE5/MAN2B1/GGH/IQGAP1/COPB1/BRI3/B2M/PLAUR/CD58/MAGT1/TMEM179B/IDH1/PPIA/ARPC5/CHI3L1/DSN1/FUCA2/NRAS/RAB27A/MMP9/CD93/LGALS3/HEBP2/NPC2/CTSB/DIAPH1/CSTB/TNFAIP6/TUBB/PNP/PSMA5/CTSC/DEGS1/COTL1/SDCBP/IQGAP2/CLEC5A/GSDMD/NFKB1/VAT1/RHOA/ANO6…	85
GO:0043062	extracellular structure organization	75/1281	402/18493	2.07797e-15	1.62369e-12	1.42518e-12	PLOD3/P4HB/SERPINH1/COLGALT1/LAMC1/PLOD1/MMP14/PRDX4/BMP1/ANXA2/COL4A2/ADAM12/COL4A1/TIMP1/ITGB1/ANXA2P2/ITGA5/EMILIN1/PDPN/MMP2/FN1/COL1A2/BGN/SOAT1/PTX3/BCL3/TNFRSF1A/COL5A2/LOX/COL6A2/HSPG2/SDC1/COL6A1/ENG/COL3A1/EFEMP2/P3H4/MMP11/COL1A1/LOXL3/LOXL2/TNC/ELN/F11R/MMP9/MPV17/LAMB2/FMOD/OLFML2A/ADAMTSL4/COL5A1/ITGB3/TGFBI/CTSL/ITGA4/SDCBP/TNFRSF11B/LAMA4/SERPINE1/PLOD2/LAMB1/HPSE2/POSTN/ICAM3/PLA…	75
GO:0042119	neutrophil activation	86/1281	498/18493	2.09123e-15	1.62369e-12	1.42518e-12	GUSB/TXNDC5/DDOST/PSMC2/GLA/CANT1/GLB1/CMTM6/CD63/HEXB/PRDX4/CKAP4/ANXA2/SURF4/PYGL/GALNS/PGM2/GRN/S100A11/PSMA2/NCSTN/RAP1B/CTSA/GNS/PLAU/RAP2B/ERP44/PTX3/ADGRE5/MAN2B1/GGH/IQGAP1/COPB1/BRI3/B2M/PLAUR/CD58/MAGT1/TMEM179B/IDH1/PPIA/ARPC5/CHI3L1/DSN1/FUCA2/NRAS/RAB27A/MMP9/CD93/LGALS3/HEBP2/NPC2/CTSB/DIAPH1/CSTB/TNFAIP6/TUBB/PNP/PSMA5/CTSC/DEGS1/COTL1/SDCBP/IQGAP2/CLEC5A/GSDMD/NFKB1/VAT1/RHOA/ANO6…	86
GO:0006261	DNA-dependent DNA replication	41/1281	148/18493	6.92812e-15	4.70679e-12	4.13135e-12	RFC2/CDK2/PCNA/MGME1/GINS4/SSBP1/MCM3/POLD3/MCM2/RPA3/MCM5/E2F7/MCM6/TIPIN/CHEK2/RNASEH2A/TIMELESS/E2F8/POLA2/GINS2/GINS1/CDC6/RFWD3/LRWD1/ORC5/SMARCAL1/POLD1/PRIM2/RAD51/POLE2/ORC1/DSCC1/POLD2/RFC4/ALYREF/RPA1/WDHD1/FBXO5/ZMPSTE24/CDC45/SLBP	41
GO:0007059	chromosome segregation	61/1281	312/18493	1.05586e-13	6.37622e-11	5.59668e-11	NUP37/SMC4/ACTR3/CCNB1/KIF18A/NEK6/SGO2/CDCA8/KIF4A/P3H4/CIAO2A/CDC20/DSN1/PTTG1/KIF2C/TACC3/UBE2I/BRCA1/KIF23/CDC6/RAN/CENPN/DLGAP5/SKA1/PLK1/BUB1/TRIP13/OIP5/ECT2/NUP62/CDC42/RIOK3/NDC80/PSRC1/ZNF207/NUSAP1/HJURP/DSCC1/BOD1/BIRC5/NUF2/PRC1/HASPIN/RACGAP1/CENPE/NCAPH/NCAPG/SGO1/ANKRD53/KIF14/MIS18A/MLH1/H2AFY/RAD18/FBXO5/FANCD2/RCC2/CENPW/SKA3/AURKB/MAD2L1	61
GO:0000070	mitotic sister chromatid segregation	39/1281	153/18493	5.9072e-13	3.21057e-10	2.81805e-10	SMC4/CCNB1/KIF18A/NEK6/CDCA8/KIF4A/CDC20/DSN1/PTTG1/KIF2C/TACC3/KIF23/CDC6/RAN/DLGAP5/PLK1/BUB1/TRIP13/NUP62/NDC80/PSRC1/ZNF207/NUSAP1/DSCC1/BOD1/NUF2/PRC1/HASPIN/RACGAP1/CENPE/NCAPH/NCAPG/SGO1/ANKRD53/KIF14/H2AFY/FBXO5/AURKB/MAD2L1	39
GO:0030199	collagen fibril organization	22/1281	52/18493	9.4094e-13	4.6491e-10	4.08071e-10	PLOD3/SERPINH1/COLGALT1/PLOD1/ANXA2/ANXA2P2/EMILIN1/COL1A2/COL5A2/LOX/COL3A1/P3H4/MMP11/COL1A1/LOXL3/LOXL2/FMOD/COL5A1/PLOD2/LUM/TGFBR1/AEBP1	22
GO:0000082	G1/S transition of mitotic cell cycle	53/1281	263/18493	1.28624e-12	5.8256e-10	5.11337e-10	CDK2/PCNA/WEE1/CASP2/ITGB1/RBBP8/MCM3/AURKA/MCM2/RPA3/BAX/CCNB1/MCM5/ANXA1/E2F7/MCM6/TYMS/CHEK2/CNOT11/E2F8/POLA2/TRIAP1/CDKN2C/RRM2/CDC6/CDKN3/RFWD3/ORC5/PRIM2/POLE2/ORC1/LATS2/DBF4/CRLF3/LSM10/GTSE1/BTN2A2/E2F4/PLK3/BCAT1/CUL1/RPA1/KIF14/E2F6/EZH2/MCM8/CDK1/FBXO5/IQGAP3/CDC45/CARM1/CDC25C/GADD45A	53
GO:0044843	cell cycle G1/S phase transition	55/1281	282/18493	1.92978e-12	8.06796e-10	7.08159e-10	CDK2/PCNA/WEE1/CASP2/ITGB1/RBBP8/MCM3/AURKA/MCM2/RPA3/BAX/CCNB1/MCM5/ANXA1/E2F7/MCM6/TYMS/CHEK2/CNOT11/E2F8/CCNA2/POLA2/TRIAP1/CDKN2C/RRM2/CDC6/CDKN3/RFWD3/ORC5/PRIM2/POLE2/ORC1/LATS2/DBF4/CRLF3/LSM10/GTSE1/BTN2A2/E2F4/PLK3/BCAT1/CUL1/RPA1/SUSD2/KIF14/E2F6/EZH2/MCM8/CDK1/FBXO5/IQGAP3/CDC45/CARM1/CDC25C/GADD45A	55
GO:0140014	mitotic nuclear division	52/1281	277/18493	3.46616e-11	1.34561e-08	1.1811e-08	SMC4/AURKA/CCNB1/FLNA/KIF18A/CHEK2/NEK6/CDCA8/KIF4A/CHEK1/CDC20/DSN1/CCNA2/PTTG1/KIF2C/TACC3/KIF23/CDC6/RAN/DLGAP5/BORA/PLK1/BUB1/TRIP13/MYBL2/NUP62/CCNB2/NDC80/PSRC1/ZNF207/NUSAP1/DSCC1/TPX2/BOD1/UBE2C/NUF2/PRC1/HASPIN/RACGAP1/RHOA/CENPE/NCAPH/NCAPG/SGO1/ANKRD53/KIF14/H2AFY/FBXO5/EPS8/CDC25C/AURKB/MAD2L1	52
GO:0007093	mitotic cell cycle checkpoint	38/1281	166/18493	3.91926e-11	1.42008e-08	1.24646e-08	CDK2/PCNA/WEE1/CASP2/HUS1/AURKA/BAX/CCNB1/E2F7/TIPIN/CHEK2/CNOT11/DCLRE1B/CDC20/E2F8/TRIAP1/BRCA1/CDC6/RINT1/RFWD3/PLK1/BUB1/TRIP13/ORC1/NDC80/ZNF207/ZWILCH/GTSE1/E2F4/PLK3/HMGA2/MAP3K20/CDK1/CARM1/CDC25C/AURKB/GADD45A/MAD2L1	38
GO:0000075	cell cycle checkpoint	44/1281	216/18493	7.22213e-11	2.45327e-08	2.15333e-08	CDK2/PCNA/WEE1/CASP2/HUS1/AURKA/BAX/CCNB1/E2F7/TIPIN/CHEK2/CNOT11/CHEK1/DCLRE1B/TIMELESS/CDC20/E2F8/TRIAP1/BRCA1/CDC6/RINT1/RFWD3/PLK1/BUB1/TRIP13/ORC1/WDR76/NDC80/FBXO4/ZNF207/ZWILCH/GTSE1/E2F4/PLK3/HMGA2/MAP3K20/H2AFX/CDK1/CDC45/CARM1/CDC25C/AURKB/GADD45A/MAD2L1	44
GO:0000819	sister chromatid segregation	40/1281	185/18493	7.87378e-11	2.51729e-08	2.20953e-08	SMC4/CCNB1/KIF18A/NEK6/SGO2/CDCA8/KIF4A/CDC20/DSN1/PTTG1/KIF2C/TACC3/KIF23/CDC6/RAN/DLGAP5/PLK1/BUB1/TRIP13/NUP62/NDC80/PSRC1/ZNF207/NUSAP1/DSCC1/BOD1/NUF2/PRC1/HASPIN/RACGAP1/CENPE/NCAPH/NCAPG/SGO1/ANKRD53/KIF14/H2AFY/FBXO5/AURKB/MAD2L1	40
GO:1901988	negative regulation of cell cycle phase transition	43/1281	211/18493	1.16915e-10	3.53017e-08	3.09858e-08	CDK2/PCNA/WEE1/CASP2/HUS1/AURKA/BAX/CCNB1/E2F7/CHEK2/CNOT11/CHEK1/CDC20/E2F8/TRIAP1/ZFP36L2/BRCA1/CDC6/RINT1/RFWD3/PLK1/BUB1/TRIP13/ORC1/NDC80/ZNF207/ATF5/GTSE1/BTN2A2/E2F4/PLK3/CUL1/HMGA2/SUSD2/H2AFY/EZH2/CDK1/FBXO5/CARM1/CDC25C/AURKB/GADD45A/MAD2L1	43
GO:1901136	carbohydrate derivative catabolic process	40/1281	189/18493	1.56744e-10	4.48369e-08	3.93552e-08	GUSB/EDEM2/GLA/GLB1/HEXB/GALNS/PGM2/GNS/BGN/DPYD/APOBEC3C/HSPG2/SDC1/MGAT1/HYAL2/UPP1/NAGA/GNPDA1/HEXA/SGSH/FUCA2/AHCY/FMOD/NGLY1/PNP/UNG/APOBEC3B/APOBEC3F/ABCD1/TYMP/HMMR/HPSE2/APOBEC3G/PDE2A/LUM/NEU1/GPC1/CD44/NUDT1/APOBEC3D	40
GO:1902850	microtubule cytoskeleton organization involved in mitosis	31/1281	129/18493	6.80318e-10	1.84876e-07	1.62274e-07	AURKA/CCNB1/FLNA/SPRY1/CHEK2/KIF4A/CENPA/STIL/CDC20/TACC3/KIF23/RAN/BORA/PLK1/MYBL2/NUP62/POC1A/NDC80/PSRC1/ZNF207/NUSAP1/TPX2/SPRY2/NUF2/PRC1/RACGAP1/RHOA/CENPE/ANKRD53/AURKB/RAE1	31
GO:1901991	negative regulation of mitotic cell cycle phase transition	39/1281	191/18493	8.0191e-10	2.07542e-07	1.82168e-07	CDK2/PCNA/WEE1/CASP2/HUS1/AURKA/BAX/CCNB1/E2F7/CHEK2/CNOT11/CDC20/E2F8/TRIAP1/ZFP36L2/BRCA1/CDC6/RINT1/RFWD3/PLK1/BUB1/TRIP13/ORC1/NDC80/ZNF207/GTSE1/BTN2A2/E2F4/PLK3/CUL1/HMGA2/EZH2/CDK1/FBXO5/CARM1/CDC25C/AURKB/GADD45A/MAD2L1	39
GO:0098813	nuclear chromosome segregation	47/1281	258/18493	8.61341e-10	2.1279e-07	1.86775e-07	SMC4/ACTR3/CCNB1/KIF18A/NEK6/SGO2/CDCA8/KIF4A/P3H4/CDC20/DSN1/PTTG1/KIF2C/TACC3/KIF23/CDC6/RAN/DLGAP5/PLK1/BUB1/TRIP13/ECT2/NUP62/CDC42/NDC80/PSRC1/ZNF207/NUSAP1/DSCC1/BOD1/NUF2/PRC1/HASPIN/RACGAP1/CENPE/NCAPH/NCAPG/SGO1/ANKRD53/KIF14/MLH1/H2AFY/FBXO5/FANCD2/RCC2/AURKB/MAD2L1	47
GO:0010948	negative regulation of cell cycle process	52/1281	304/18493	1.13228e-09	2.67562e-07	2.3485e-07	CALR/CDK2/PCNA/WEE1/CASP2/RBBP8/HUS1/AURKA/BAX/CCNB1/E2F7/LIF/CHEK2/CNOT11/CHEK1/CDC20/E2F8/TRIAP1/ZFP36L2/PTTG1/BRCA1/RRM2/CDC6/RINT1/RFWD3/PLK1/CBX3/BUB1/TRIP13/RAD51/ORC1/NDC80/ZNF207/ATF5/GTSE1/BTN2A2/E2F4/PLK3/CUL1/HMGA2/SUSD2/E2F6/H2AFY/EZH2/CDK1/FBXO5/NUBP1/CARM1/CDC25C/AURKB/GADD45A/MAD2L1	52
GO:0072401	signal transduction involved in DNA integrity checkpoint	22/1281	73/18493	2.17683e-09	4.73243e-07	4.15386e-07	CDK2/PCNA/CASP2/AURKA/BAX/CCNB1/E2F7/CHEK2/CNOT11/CHEK1/E2F8/TRIAP1/BRCA1/RINT1/PLK1/GTSE1/E2F4/PLK3/CDK1/CARM1/CDC25C/GADD45A	22
GO:0072422	signal transduction involved in DNA damage checkpoint	22/1281	73/18493	2.17683e-09	4.73243e-07	4.15386e-07	CDK2/PCNA/CASP2/AURKA/BAX/CCNB1/E2F7/CHEK2/CNOT11/CHEK1/E2F8/TRIAP1/BRCA1/RINT1/PLK1/GTSE1/E2F4/PLK3/CDK1/CARM1/CDC25C/GADD45A	22
GO:0031570	DNA integrity checkpoint	34/1281	158/18493	2.33306e-09	4.87699e-07	4.28074e-07	CDK2/PCNA/CASP2/HUS1/AURKA/BAX/CCNB1/E2F7/TIPIN/CHEK2/CNOT11/CHEK1/TIMELESS/E2F8/TRIAP1/BRCA1/CDC6/RINT1/RFWD3/PLK1/ORC1/WDR76/FBXO4/GTSE1/E2F4/PLK3/HMGA2/MAP3K20/H2AFX/CDK1/CDC45/CARM1/CDC25C/GADD45A	34
GO:0072395	signal transduction involved in cell cycle checkpoint	22/1281	74/18493	2.89688e-09	5.8313e-07	5.11838e-07	CDK2/PCNA/CASP2/AURKA/BAX/CCNB1/E2F7/CHEK2/CNOT11/CHEK1/E2F8/TRIAP1/BRCA1/RINT1/PLK1/GTSE1/E2F4/PLK3/CDK1/CARM1/CDC25C/GADD45A	22
GO:0044786	cell cycle DNA replication	20/1281	62/18493	3.102e-09	6.0212e-07	5.28506e-07	RFC2/PCNA/POLD3/RPA3/E2F7/TIPIN/CHEK2/E2F8/POLA2/GINS1/POLD1/PRIM2/RAD51/POLD2/RFC4/RPA1/FBXO5/ZMPSTE24/CDC45/SLBP	20
GO:0007052	mitotic spindle organization	27/1281	108/18493	3.36856e-09	6.31314e-07	5.5413e-07	AURKA/CCNB1/FLNA/CHEK2/KIF4A/STIL/CDC20/TACC3/KIF23/RAN/BORA/PLK1/MYBL2/NUP62/POC1A/NDC80/PSRC1/ZNF207/TPX2/NUF2/PRC1/RACGAP1/RHOA/CENPE/ANKRD53/AURKB/RAE1	27
GO:0007051	spindle organization	34/1281	165/18493	7.55914e-09	1.29946e-06	1.14059e-06	HDAC3/AURKA/CCNB1/FLNA/HAUS1/CHEK2/NEK6/KIF4A/STIL/CDC20/HAUS8/TACC3/KIF23/RAN/BORA/PLK1/MYBL2/NUP62/POC1A/TUBB/NDC80/PSRC1/ZNF207/TPX2/NUF2/PRC1/RACGAP1/RHOA/CENPE/ANKRD53/MLH1/FBXO5/AURKB/RAE1	34
GO:0072413	signal transduction involved in mitotic cell cycle checkpoint	19/1281	59/18493	7.92419e-09	1.29946e-06	1.14059e-06	CDK2/PCNA/CASP2/AURKA/BAX/CCNB1/E2F7/CHEK2/CNOT11/E2F8/TRIAP1/RINT1/GTSE1/E2F4/PLK3/CDK1/CARM1/CDC25C/GADD45A	19
GO:1902402	signal transduction involved in mitotic DNA damage checkpoint	19/1281	59/18493	7.92419e-09	1.29946e-06	1.14059e-06	CDK2/PCNA/CASP2/AURKA/BAX/CCNB1/E2F7/CHEK2/CNOT11/E2F8/TRIAP1/RINT1/GTSE1/E2F4/PLK3/CDK1/CARM1/CDC25C/GADD45A	19
GO:1902403	signal transduction involved in mitotic DNA integrity checkpoint	19/1281	59/18493	7.92419e-09	1.29946e-06	1.14059e-06	CDK2/PCNA/CASP2/AURKA/BAX/CCNB1/E2F7/CHEK2/CNOT11/E2F8/TRIAP1/RINT1/GTSE1/E2F4/PLK3/CDK1/CARM1/CDC25C/GADD45A	19
GO:0000280	nuclear division	62/1281	416/18493	8.12907e-09	1.29946e-06	1.14059e-06	CALR/SMC4/ACTR3/AURKA/CCNB1/FLNA/KIF18A/LIF/CHEK2/NEK6/SGO2/CDCA8/KIF4A/CHEK1/P3H4/CDC20/DSN1/CCNA2/PTTG1/KIF2C/TACC3/KIF23/CDC6/RAN/DLGAP5/BORA/PLK1/BUB1/TRIP13/RAD51/MYBL2/RAD54B/NUP62/CCNB2/NDC80/PSRC1/ZNF207/NUSAP1/CKS2/DSCC1/TPX2/BOD1/UBE2C/NUF2/PRC1/HASPIN/RACGAP1/RHOA/CENPE/NCAPH/NCAPG/SGO1/ANKRD53/KIF14/MLH1/H2AFY/FBXO5/FANCD2/EPS8/CDC25C/AURKB/MAD2L1	62
GO:0006487	protein N-linked glycosylation	21/1281	72/18493	9.67505e-09	1.5024e-06	1.31872e-06	RPN2/DDOST/ALG3/OSTC/PMM2/STT3A/RPN1/DPAGT1/MGAT2/ALG8/MGAT4B/ALG2/TMEM165/MAGT1/OST4/MGAT1/ALG6/ALG12/ALG1/MOGS/KRTCAP2	21
GO:0006977	DNA damage response, signal transduction by p53 class mediator resulting in cell cycle arrest	18/1281	56/18493	2.02565e-08	3.05817e-06	2.68428e-06	CDK2/PCNA/CASP2/AURKA/BAX/CCNB1/E2F7/CHEK2/CNOT11/E2F8/TRIAP1/GTSE1/E2F4/PLK3/CDK1/CARM1/CDC25C/GADD45A	18
GO:0048285	organelle fission	65/1281	458/18493	2.47479e-08	3.58456e-06	3.14632e-06	CALR/SMC4/ACTR3/AURKA/CCNB1/FLNA/KIF18A/MUL1/LIF/CHEK2/NEK6/SGO2/CDCA8/KIF4A/CHEK1/MTFR1/P3H4/CDC20/DSN1/CCNA2/PTTG1/KIF2C/TACC3/KIF23/CDC6/RAN/DLGAP5/BORA/PLK1/BUB1/TRIP13/RAD51/MYBL2/RAD54B/NUP62/CCNB2/NDC80/PSRC1/ZNF207/NUSAP1/CKS2/DSCC1/TPX2/BOD1/UBE2C/NUF2/PRC1/HASPIN/RACGAP1/RHOA/MTFR2/CENPE/NCAPH/NCAPG/SGO1/ANKRD53/KIF14/MLH1/H2AFY/FBXO5/FANCD2/EPS8/CDC25C/AURKB/MAD2L1	65
GO:0031571	mitotic G1 DNA damage checkpoint	19/1281	63/18493	2.66311e-08	3.58456e-06	3.14632e-06	CDK2/PCNA/CASP2/AURKA/BAX/CCNB1/E2F7/CHEK2/CNOT11/E2F8/TRIAP1/RFWD3/GTSE1/E2F4/PLK3/CDK1/CARM1/CDC25C/GADD45A	19
GO:0044819	mitotic G1/S transition checkpoint	19/1281	63/18493	2.66311e-08	3.58456e-06	3.14632e-06	CDK2/PCNA/CASP2/AURKA/BAX/CCNB1/E2F7/CHEK2/CNOT11/E2F8/TRIAP1/RFWD3/GTSE1/E2F4/PLK3/CDK1/CARM1/CDC25C/GADD45A	19
GO:0033260	nuclear DNA replication	17/1281	51/18493	2.70547e-08	3.58456e-06	3.14632e-06	RFC2/PCNA/POLD3/RPA3/TIPIN/CHEK2/POLA2/GINS1/POLD1/PRIM2/RAD51/POLD2/RFC4/RPA1/ZMPSTE24/CDC45/SLBP	17
GO:0072431	signal transduction involved in mitotic G1 DNA damage checkpoint	18/1281	57/18493	2.77004e-08	3.58456e-06	3.14632e-06	CDK2/PCNA/CASP2/AURKA/BAX/CCNB1/E2F7/CHEK2/CNOT11/E2F8/TRIAP1/GTSE1/E2F4/PLK3/CDK1/CARM1/CDC25C/GADD45A	18
GO:1902400	intracellular signal transduction involved in G1 DNA damage checkpoint	18/1281	57/18493	2.77004e-08	3.58456e-06	3.14632e-06	CDK2/PCNA/CASP2/AURKA/BAX/CCNB1/E2F7/CHEK2/CNOT11/E2F8/TRIAP1/GTSE1/E2F4/PLK3/CDK1/CARM1/CDC25C/GADD45A	18
GO:0030330	DNA damage response, signal transduction by p53 class mediator	25/1281	104/18493	2.98322e-08	3.77065e-06	3.30966e-06	CDK2/PCNA/CASP2/AURKA/BAX/CCNB1/BCL3/E2F7/CHEK2/CNOT11/DYRK3/E2F8/TRIAP1/BRCA1/SP100/GTSE1/FOXM1/E2F4/PLK3/CDK1/ZMPSTE24/CARM1/CD44/CDC25C/GADD45A	25
GO:1901987	regulation of cell cycle phase transition	60/1281	412/18493	3.34606e-08	4.13314e-06	3.62783e-06	CDK2/PCNA/WEE1/CASP2/HUS1/AURKA/BAX/CCNB1/ANXA1/HAUS1/E2F7/CHEK2/NEK6/CNOT11/CHEK1/NEDD1/DYRK3/CDC20/E2F8/TRIAP1/ZFP36L2/HAUS8/BRCA1/CDC6/RINT1/RFWD3/DLGAP5/PLK1/BUB1/TRIP13/ORC1/TUBB/ODF2/NDC80/ZNF207/TPX2/LSM10/ATF5/GTSE1/BTN2A2/UBE2C/E2F4/PLK3/HMMR/CENPE/CUL1/HMGA2/SUSD2/KIF14/H2AFY/EZH2/CDK1/FBXO5/CDC45/RCC2/CARM1/CDC25C/AURKB/GADD45A/MAD2L1	60
GO:0044783	G1 DNA damage checkpoint	19/1281	64/18493	3.54334e-08	4.27957e-06	3.75636e-06	CDK2/PCNA/CASP2/AURKA/BAX/CCNB1/E2F7/CHEK2/CNOT11/E2F8/TRIAP1/RFWD3/GTSE1/E2F4/PLK3/CDK1/CARM1/CDC25C/GADD45A	19
GO:0009100	glycoprotein metabolic process	58/1281	394/18493	3.85461e-08	4.48078e-06	3.93297e-06	PLOD3/CHST14/RPN2/EDEM2/DDOST/CHPF2/ALG3/OSTC/CANT1/PMM2/STT3A/HEXB/POFUT1/RPN1/EXT2/DPAGT1/GAL3ST4/GALNT2/DERL2/GANAB/DPY19L1/MGAT2/ALG8/BACE2/BGN/MGAT4B/SOAT1/ERP44/PTX3/MAN2B1/C1GALT1C1/ALG2/TMEM165/SLC35C1/MAGT1/OST4/MGAT1/ALG6/ALG12/HEXA/SGSH/CHST12/CHPF/NGLY1/GALNT5/B3GNT5/HS2ST1/B3GALNT2/RXYLT1/ALG1/CHSY1/DPM1/MOGS/SLC35D1/ST8SIA4/KRTCAP2/GPC1/FUT9	58
GO:0044839	cell cycle G2/M phase transition	39/1281	218/18493	3.87483e-08	4.48078e-06	3.93297e-06	CDK2/WEE1/HUS1/AURKA/CCNB1/HAUS1/CHEK2/FBXL12/CHEK1/NEDD1/DYRK3/CCNA2/HAUS8/BRCA1/CDC6/RINT1/BORA/PLK1/MELK/ORC1/TUBB/ODF2/CCNB2/TPX2/ATF5/GTSE1/FOXM1/PLK3/HMMR/CUL1/HMGA2/KIF14/H2AFY/CDK1/FBXO5/AJUBA/RCC2/CDC25C/AURKB	39
GO:0045930	negative regulation of mitotic cell cycle	46/1281	281/18493	4.11339e-08	4.65755e-06	4.08813e-06	CDK2/PCNA/WEE1/CASP2/HUS1/AURKA/BAX/CCNB1/BTG3/E2F7/TIPIN/CHEK2/CNOT11/CHEK1/DCLRE1B/CDC20/E2F8/TRIAP1/ZFP36L2/PTTG1/BRCA1/CDC6/RINT1/RFWD3/PLK1/BUB1/TRIP13/ORC1/NDC80/ZNF207/ZWILCH/GTSE1/BTN2A2/E2F4/PLK3/CUL1/HMGA2/MAP3K20/EZH2/CDK1/FBXO5/CARM1/CDC25C/AURKB/GADD45A/MAD2L1	46
GO:0034976	response to endoplasmic reticulum stress	44/1281	264/18493	4.71602e-08	5.23093e-06	4.59141e-06	PDIA6/P4HB/CALR/TBL2/EDEM2/HSPA5/MANF/DNAJB11/MYDGF/PDIA5/SHC1/DERL2/HM13/HSP90B1/CASP4/BAX/PDIA3/ERP44/BAK1/XBP1/TXNDC12/SRPRA/TMUB1/KDELR3/SEC61B/SDF2L1/PTPN2/BFAR/SRPRB/TMCO1/LMNA/TMX1/FAM129A/TOR1A/PTPN1/AUP1/SEC13/UBE2J2/SELENOS/BCAP31/CREB3L2/WIPI1/SSR1/FCGR2B	44
GO:0044774	mitotic DNA integrity checkpoint	25/1281	107/18493	5.46538e-08	5.94087e-06	5.21455e-06	CDK2/PCNA/CASP2/HUS1/AURKA/BAX/CCNB1/E2F7/TIPIN/CHEK2/CNOT11/E2F8/TRIAP1/CDC6/RINT1/RFWD3/ORC1/GTSE1/E2F4/PLK3/HMGA2/CDK1/CARM1/CDC25C/GADD45A	25
GO:0042770	signal transduction in response to DNA damage	28/1281	130/18493	5.80902e-08	6.19059e-06	5.43374e-06	CDK2/PCNA/CASP2/AURKA/BAX/CCNB1/BCL3/E2F7/CHEK2/CNOT11/CHEK1/DYRK3/E2F8/TRIAP1/BRCA1/RINT1/PLK1/SP100/GTSE1/FOXM1/E2F4/PLK3/CDK1/ZMPSTE24/CARM1/CD44/CDC25C/GADD45A	28
GO:0006890	retrograde vesicle-mediated transport, Golgi to ER	22/1281	86/18493	6.03582e-08	6.23837e-06	5.47567e-06	KDELR2/TMED9/LMAN2/KDELR1/SURF4/ERGIC1/ERGIC3/TMED2/ARF4/KIF18A/COPB1/KIF4A/KDELR3/KIF2C/KIF23/RINT1/TMED10/RER1/COPB2/RACGAP1/CENPE/TMED3	22
GO:0000077	DNA damage checkpoint	30/1281	146/18493	6.08341e-08	6.23837e-06	5.47567e-06	CDK2/PCNA/CASP2/HUS1/AURKA/BAX/CCNB1/E2F7/TIPIN/CHEK2/CNOT11/CHEK1/E2F8/TRIAP1/BRCA1/RINT1/RFWD3/PLK1/WDR76/FBXO4/GTSE1/E2F4/PLK3/HMGA2/MAP3K20/H2AFX/CDK1/CARM1/CDC25C/GADD45A	30
GO:0008608	attachment of spindle microtubules to kinetochore	13/1281	32/18493	7.97076e-08	8.02243e-06	7.04162e-06	CCNB1/KIF2C/ECT2/CDC42/NDC80/ZNF207/BOD1/NUF2/RACGAP1/CENPE/SGO1/RCC2/AURKB	13
GO:1901990	regulation of mitotic cell cycle phase transition	55/1281	375/18493	9.8051e-08	9.68922e-06	8.50463e-06	CDK2/PCNA/WEE1/CASP2/HUS1/AURKA/BAX/CCNB1/ANXA1/HAUS1/E2F7/CHEK2/NEK6/CNOT11/NEDD1/CDC20/E2F8/TRIAP1/ZFP36L2/HAUS8/BRCA1/CDC6/RINT1/RFWD3/DLGAP5/PLK1/BUB1/TRIP13/ORC1/TUBB/ODF2/NDC80/ZNF207/TPX2/LSM10/GTSE1/BTN2A2/UBE2C/E2F4/PLK3/HMMR/CENPE/CUL1/HMGA2/KIF14/EZH2/CDK1/FBXO5/CDC45/RCC2/CARM1/CDC25C/AURKB/GADD45A/MAD2L1	55
GO:0071158	positive regulation of cell cycle arrest	21/1281	82/18493	1.17604e-07	1.14139e-05	1.00184e-05	CDK2/PCNA/CASP2/AURKA/BAX/CCNB1/E2F7/CHEK2/CNOT11/E2F8/TRIAP1/BRCA1/CRLF3/GTSE1/E2F4/PLK3/HMGA2/CDK1/CARM1/CDC25C/GADD45A	21
GO:0071103	DNA conformation change	45/1281	283/18493	1.38067e-07	1.31649e-05	1.15553e-05	SMC4/GINS4/HAT1/ASF1B/MCM2/CENPL/CCNB1/ANXA1/MCM6/NCAPG2/CENPA/IPO4/GRWD1/RUVBL1/GINS2/GINS1/CENPU/HMGB2/CENPN/SMARCAL1/OIP5/RAD51/RECQL/CENPK/RAD54B/ITGB3BP/CENPH/HIST1H2BH/NUSAP1/HJURP/POT1/CENPM/NCAPH/RAD54L/HMGA2/NCAPG/RPA1/H2AFX/G3BP1/MIS18A/H2AFY/CDK1/CDC45/CENPW/HIST1H2BK	45
GO:0043687	post-translational protein modification	53/1281	361/18493	1.6181e-07	1.51627e-05	1.33089e-05	CALU/PDIA6/P4HB/LAMC1/PSMC2/FSTL1/FAM20C/P3H1/CKAP4/RAB8A/TIMP1/LRR1/HSP90B1/PSMA2/FN1/SHISA5/DDB2/NUCB1/FBXL12/CISH/LGALS1/PSMA7/FUCA2/TNC/SUMF1/IGFBP7/PSMC4/LAMB2/PSMB8/PSMD9/PSMA5/SUMF2/FBXO4/COPS6/DSCC1/PSMB9/PSMA1/ICMT/FBXO22/LAMB1/IGFBP4/SERPINA1/RCN1/CUL1/PSMB2/PSMD8/PSMB4/UBE2F/FBXW9/FEM1C/SOCS2/IGFBP5/SPP1	53
GO:0044773	mitotic DNA damage checkpoint	23/1281	98/18493	1.69106e-07	1.55778e-05	1.36733e-05	CDK2/PCNA/CASP2/HUS1/AURKA/BAX/CCNB1/E2F7/TIPIN/CHEK2/CNOT11/E2F8/TRIAP1/RINT1/RFWD3/GTSE1/E2F4/PLK3/HMGA2/CDK1/CARM1/CDC25C/GADD45A	23
GO:0010212	response to ionizing radiation	29/1281	146/18493	2.1635e-07	1.95977e-05	1.72017e-05	IKBIP/HSPA5/CASP3/HUS1/BAX/BAK1/NAMPT/ANXA1/NOX4/CHEK2/BRCA1/RFWD3/ECT2/RAD51AP1/RAD51/TIGAR/FBXO4/TMEM109/CXCL10/AEN/DNMT3A/RAD54L/HMGA2/MAP3K20/H2AFX/RRM1/ZMPSTE24/FANCD2/GADD45A	29
GO:0006336	DNA replication-independent nucleosome assembly	16/1281	54/18493	4.36541e-07	3.86221e-05	3.39002e-05	HAT1/ASF1B/CENPL/CENPA/IPO4/RUVBL1/CENPU/CENPN/OIP5/CENPK/ITGB3BP/CENPH/HJURP/CENPM/MIS18A/CENPW	16
GO:0051983	regulation of chromosome segregation	23/1281	103/18493	4.40583e-07	3.86221e-05	3.39002e-05	CCNB1/NEK6/CDC20/PTTG1/KIF2C/TACC3/CDC6/DLGAP5/PLK1/BUB1/TRIP13/ECT2/CDC42/NDC80/ZNF207/RACGAP1/CENPE/H2AFY/RAD18/FBXO5/RCC2/AURKB/MAD2L1	23
GO:0090068	positive regulation of cell cycle process	44/1281	286/18493	4.89036e-07	4.2189e-05	3.70311e-05	CDK2/PCNA/CASP2/AURKA/BAX/CCNB1/ANXA1/E2F7/CHEK2/CNOT11/DYRK3/E2F8/TRIAP1/BRCA1/KIF23/CDC6/DLGAP5/ECT2/NUP62/POC1A/CDC42/NDC80/CRLF3/NUSAP1/LSM10/GTSE1/UBE2C/E2F4/PLK3/RACGAP1/RHOA/HMGA2/KIF14/H2AFY/EZH2/CDK1/FBXO5/CDC45/RCC2/CARM1/CDC25C/AURKB/GADD45A/MAD2L1	44
GO:0006986	response to unfolded protein	31/1281	169/18493	5.34141e-07	4.53603e-05	3.98146e-05	PDIA6/CALR/SERPINH1/TBL2/EDEM2/HSPA5/MANF/DNAJB11/MYDGF/PDIA5/SHC1/TOR1B/DERL2/HSP90B1/BAX/ERP44/BAK1/XBP1/SRPRA/KDELR3/PTPN2/BFAR/SRPRB/LMNA/HSPB1/PTPN1/UBE2J2/SELENOS/CREB3L2/WIPI1/SSR1	31
GO:0034724	DNA replication-independent nucleosome organization	16/1281	55/18493	5.76301e-07	4.81877e-05	4.22963e-05	HAT1/ASF1B/CENPL/CENPA/IPO4/RUVBL1/CENPU/CENPN/OIP5/CENPK/ITGB3BP/CENPH/HJURP/CENPM/MIS18A/CENPW	16
GO:1901658	glycosyl compound catabolic process	14/1281	43/18493	6.35906e-07	5.22321e-05	4.58463e-05	GUSB/GLA/DPYD/APOBEC3C/UPP1/NAGA/FUCA2/AHCY/PNP/APOBEC3B/APOBEC3F/TYMP/APOBEC3G/APOBEC3D	14
GO:0006027	glycosaminoglycan catabolic process	17/1281	62/18493	6.53502e-07	5.22321e-05	4.58463e-05	GUSB/GLB1/HEXB/GALNS/GNS/BGN/HSPG2/SDC1/HYAL2/HEXA/SGSH/FMOD/HMMR/HPSE2/LUM/GPC1/CD44	17
GO:0036498	IRE1-mediated unfolded protein response	17/1281	62/18493	6.53502e-07	5.22321e-05	4.58463e-05	PDIA6/HSPA5/DNAJB11/MYDGF/PDIA5/SHC1/BAX/BAK1/XBP1/SRPRA/KDELR3/BFAR/SRPRB/LMNA/PTPN1/WIPI1/SSR1	17
GO:1900122	positive regulation of receptor binding	7/1281	10/18493	7.50552e-07	5.83039e-05	5.11758e-05	ANXA2/ANXA2P2/B2M/NRP1/HOXA3/MMP9/HFE	7
GO:0035966	response to topologically incorrect protein	33/1281	189/18493	7.50924e-07	5.83039e-05	5.11758e-05	PDIA6/CALR/SERPINH1/TBL2/EDEM2/HSPA5/MANF/DNAJB11/MYDGF/PDIA5/SHC1/TOR1B/DERL2/HSP90B1/BAX/ERP44/BAK1/XBP1/SRPRA/KDELR3/SDF2L1/PTPN2/BFAR/SRPRB/LMNA/HSPB1/TOR1A/PTPN1/UBE2J2/SELENOS/CREB3L2/WIPI1/SSR1	33
GO:0048193	Golgi vesicle transport	51/1281	359/18493	7.66887e-07	5.87047e-05	5.15276e-05	KDELR2/TMED9/LMAN2/KDELR1/SURF4/RAB8A/ERGIC1/TEX261/ERGIC3/CAPZA1/TMED2/SEC24D/ARF4/AP4M1/TMED4/LYPLA1/KIF18A/COPB1/CNIH4/YKT6/KIF4A/KDELR3/BET1/NRBP1/KIF2C/RAB34/KIF23/RINT1/SNX8/TMED10/RER1/LMAN2L/CTSC/COPB2/CUX2/LMAN1/CAPZA2/TFG/RACGAP1/CENPE/SERPINA1/TMED5/SEC13/PROS1/VAMP5/BCAP31/CREB3L2/RP2/WIPI1/TMED3/CTSZ	51
GO:0043123	positive regulation of I-kappaB kinase/NF-kappaB signaling	32/1281	181/18493	8.27313e-07	6.24507e-05	5.48155e-05	CANT1/RIPK1/FADD/SHISA5/MYD88/FLNA/CASP8/TMED4/TNFRSF1A/BCL10/MUL1/NEK6/RHOC/LGALS1/UBE2I/TRIM5/S100A4/IRAK4/ECT2/NUP62/FKBP1A/TFG/TNFRSF19/RHOA/TRADD/LTF/CARD16/HMOX1/CFLAR/CASP1/AJUBA/TSPAN6	32
GO:0000086	G2/M transition of mitotic cell cycle	34/1281	199/18493	8.62066e-07	6.41825e-05	5.63357e-05	CDK2/WEE1/HUS1/AURKA/CCNB1/HAUS1/CHEK2/FBXL12/NEDD1/CCNA2/HAUS8/BRCA1/CDC6/RINT1/BORA/PLK1/MELK/ORC1/TUBB/ODF2/CCNB2/TPX2/FOXM1/PLK3/HMMR/CUL1/HMGA2/KIF14/CDK1/FBXO5/AJUBA/RCC2/CDC25C/AURKB	34
GO:0071156	regulation of cell cycle arrest	23/1281	107/18493	9.01639e-07	6.62217e-05	5.81256e-05	CALR/CDK2/PCNA/CASP2/AURKA/BAX/CCNB1/E2F7/CHEK2/CNOT11/E2F8/TRIAP1/BRCA1/CRLF3/GTSE1/FOXM1/E2F4/PLK3/HMGA2/CDK1/CARM1/CDC25C/GADD45A	23
GO:0048705	skeletal system morphogenesis	38/1281	236/18493	9.28844e-07	6.73102e-05	5.9081e-05	SERPINH1/SLC39A1/MMP14/BMP1/ANXA2/ANXA2P2/MMP2/RDH10/HOXA1/COL6A2/COL6A1/HYAL2/HOXA5/SHOX2/HOXB3/COL1A1/HOXA3/EIF4A3/POR/POC1A/HOXA4/CHSY1/HOXA6/RIPPLY2/HOXB4/LTF/HOXB7/SFRP4/THBS3/SH3PXD2B/HOXA7/RYK/TGFBR1/HOXA2/HOXB2/ZMPSTE24/CARM1/HOXD10	38
GO:0010965	regulation of mitotic sister chromatid separation	16/1281	57/18493	9.82984e-07	7.02963e-05	6.1702e-05	CCNB1/NEK6/CDC20/PTTG1/TACC3/CDC6/DLGAP5/PLK1/BUB1/TRIP13/NDC80/ZNF207/CENPE/FBXO5/AURKB/MAD2L1	16
GO:0030968	endoplasmic reticulum unfolded protein response	24/1281	116/18493	1.0939e-06	7.72121e-05	6.77722e-05	PDIA6/CALR/TBL2/HSPA5/DNAJB11/MYDGF/PDIA5/SHC1/DERL2/HSP90B1/BAX/BAK1/XBP1/SRPRA/KDELR3/PTPN2/BFAR/SRPRB/LMNA/PTPN1/SELENOS/CREB3L2/WIPI1/SSR1	24
GO:0019882	antigen processing and presentation	31/1281	175/18493	1.1702e-06	8.15386e-05	7.15699e-05	CALR/CAPZA1/IFI30/SEC24D/PDIA3/KIF18A/B2M/KIF4A/HLA-B/HLA-A/RAB32/KIF2C/RAB34/KIF23/RAB27A/PSMB8/TAP1/CTSL/SH3GL2/HLA-C/CAPZA2/MR1/RELB/HFE/RACGAP1/CENPE/SEC13/FCER1G/BCAP31/HLA-DRA/FCGR2B	31
GO:0009101	glycoprotein biosynthetic process	47/1281	326/18493	1.3568e-06	9.33445e-05	8.19324e-05	PLOD3/CHST14/RPN2/DDOST/CHPF2/ALG3/OSTC/CANT1/PMM2/STT3A/POFUT1/RPN1/EXT2/DPAGT1/GAL3ST4/GALNT2/DPY19L1/MGAT2/ALG8/BACE2/BGN/MGAT4B/SOAT1/C1GALT1C1/ALG2/TMEM165/SLC35C1/MAGT1/OST4/MGAT1/ALG6/ALG12/CHST12/CHPF/GALNT5/B3GNT5/HS2ST1/B3GALNT2/RXYLT1/ALG1/CHSY1/DPM1/MOGS/SLC35D1/ST8SIA4/KRTCAP2/FUT9	47
GO:0002474	antigen processing and presentation of peptide antigen via MHC class I	14/1281	46/18493	1.59882e-06	0.00010862	9.53403e-05	CALR/IFI30/SEC24D/PDIA3/B2M/HLA-B/HLA-A/TAP1/HLA-C/MR1/HFE/SEC13/FCER1G/BCAP31	14
GO:0031589	cell-substrate adhesion	48/1281	338/18493	1.62644e-06	0.000109132	9.57901e-05	CALR/ZYX/LAMC1/MMP14/CD63/ITGB1/TNFRSF12A/ITGA5/EMILIN1/PDPN/FN1/PLAU/FLNA/IQGAP1/ACTN4/ADAM9/LGALS1/TRIP6/COL3A1/JAG1/NRP1/COL1A1/ANGPT2/VEGFA/EMILIN2/ARPC2/ITGB3/CDC42/ITGA4/ILK/GBP1/SERPINE1/ACTN1/PXN/LAMB1/RAC2/POSTN/RHOA/PTN/THBS3/KIF14/NID2/HOXA7/AJUBA/MYO1G/RCC2/NID1/CD44	48
GO:0006026	aminoglycan catabolic process	17/1281	66/18493	1.70615e-06	0.000113084	9.92587e-05	GUSB/GLB1/HEXB/GALNS/GNS/BGN/HSPG2/SDC1/HYAL2/HEXA/SGSH/FMOD/HMMR/HPSE2/LUM/GPC1/CD44	17
GO:0045787	positive regulation of cell cycle	53/1281	390/18493	1.8568e-06	0.000121587	0.000106722	CALR/CDK2/PCNA/CASP2/AURKA/BAX/CCNB1/CKS1B/ANXA1/E2F7/CHEK2/CNOT11/CHEK1/DYRK3/E2F8/CCNA2/TRIAP1/BRCA1/KIF23/TRIM21/CDC6/DLGAP5/CCNYL1/ECT2/NUP62/POC1A/CDC42/CCNB2/NDC80/CRLF3/PSRC1/NUSAP1/CKS2/LSM10/GTSE1/UBE2C/E2F4/PLK3/RACGAP1/RHOA/HMGA2/KIF14/H2AFY/EZH2/CDK1/FBXO5/CDC45/RCC2/CARM1/CDC25C/AURKB/GADD45A/MAD2L1	53
GO:0032201	telomere maintenance via semi-conservative replication	10/1281	24/18493	1.9616e-06	0.00012692	0.000111403	RFC2/PCNA/POLD3/RPA3/POLA2/POLD1/PRIM2/POLD2/RFC4/RPA1	10
GO:0043044	ATP-dependent chromatin remodeling	19/1281	81/18493	1.98592e-06	0.000126982	0.000111457	ACTL6A/MBD2/CENPL/ACTB/CENPA/RUVBL1/CENPU/HDAC1/CENPN/OIP5/CENPK/ITGB3BP/CENPH/PTMA/HJURP/SMARCE1/CENPM/MIS18A/CENPW	19
GO:0051306	mitotic sister chromatid separation	16/1281	60/18493	2.08394e-06	0.0001317	0.000115598	CCNB1/NEK6/CDC20/PTTG1/TACC3/CDC6/DLGAP5/PLK1/BUB1/TRIP13/NDC80/ZNF207/CENPE/FBXO5/AURKB/MAD2L1	16
GO:0007091	metaphase/anaphase transition of mitotic cell cycle	15/1281	54/18493	2.47212e-06	0.000154437	0.000135556	CCNB1/NEK6/CDC20/TACC3/CDC6/DLGAP5/PLK1/BUB1/TRIP13/NDC80/ZNF207/CENPE/FBXO5/AURKB/MAD2L1	15
GO:0006457	protein folding	35/1281	218/18493	2.64198e-06	0.000163101	0.00014316	PDIA6/P4HB/CALR/HSPA5/PPIB/DNAJB11/P3H1/PRDX4/PDIA5/FKBP9/TOR1B/GNB2/HSP90B1/PPIC/PDIA3/ERP44/GNAI3/B2M/UNC45A/PPIA/SIL1/ALG12/DNAJC2/NGLY1/HSPB1/LMAN2L/FKBP1A/LMAN1/TOR1A/TBCA/PDCL3/MLEC/PPIH/MOGS/RP2	35
GO:0033047	regulation of mitotic sister chromatid segregation	17/1281	68/18493	2.67083e-06	0.000163101	0.00014316	CCNB1/NEK6/CDC20/PTTG1/TACC3/CDC6/DLGAP5/PLK1/BUB1/TRIP13/NDC80/ZNF207/CENPE/H2AFY/FBXO5/AURKB/MAD2L1	17
GO:0048002	antigen processing and presentation of peptide antigen	26/1281	139/18493	2.95601e-06	0.00017851	0.000156686	CALR/CAPZA1/IFI30/SEC24D/PDIA3/KIF18A/B2M/KIF4A/HLA-B/HLA-A/KIF2C/KIF23/TAP1/CTSL/SH3GL2/HLA-C/CAPZA2/MR1/HFE/RACGAP1/CENPE/SEC13/FCER1G/BCAP31/HLA-DRA/FCGR2B	26
GO:0030203	glycosaminoglycan metabolic process	28/1281	157/18493	3.31091e-06	0.000194423	0.000170653	GUSB/CHST14/CHPF2/GLB1/HEXB/EXT2/GALNS/GNS/BGN/HSPG2/SDC1/HYAL2/HEXA/SGSH/CHST12/CHPF/FMOD/GALNT5/HS2ST1/CHSY1/NFKB1/HMMR/HPSE2/SLC35D1/LUM/SLC35D2/GPC1/CD44	28
GO:0007249	I-kappaB kinase/NF-kappaB signaling	39/1281	258/18493	3.33402e-06	0.000194423	0.000170653	CANT1/RIPK1/PRDX4/FADD/SHISA5/MYD88/FLNA/CASP8/TMED4/BCL3/TNFRSF1A/BCL10/MUL1/NEK6/RHOC/LGALS1/UBE2I/TRIM5/S100A4/IRAK4/HDAC1/ECT2/NUP62/HSPB1/FKBP1A/RIOK3/TFG/RELB/TNFRSF19/RHOA/TRADD/LTF/CARD16/HMOX1/CFLAR/CASP1/AJUBA/UBC/TSPAN6	39
GO:1905818	regulation of chromosome separation	16/1281	62/18493	3.3373e-06	0.000194423	0.000170653	CCNB1/NEK6/CDC20/PTTG1/TACC3/CDC6/DLGAP5/PLK1/BUB1/TRIP13/NDC80/ZNF207/CENPE/FBXO5/AURKB/MAD2L1	16
GO:0006888	ER to Golgi vesicle-mediated transport	34/1281	211/18493	3.36261e-06	0.000194423	0.000170653	KDELR2/TMED9/LMAN2/KDELR1/ERGIC1/TEX261/ERGIC3/CAPZA1/TMED2/SEC24D/ARF4/TMED4/COPB1/CNIH4/YKT6/KDELR3/BET1/NRBP1/RINT1/TMED10/LMAN2L/CTSC/COPB2/LMAN1/CAPZA2/TFG/SERPINA1/TMED5/SEC13/PROS1/BCAP31/CREB3L2/TMED3/CTSZ	34
GO:0006022	aminoglycan metabolic process	29/1281	167/18493	3.86593e-06	0.000221172	0.000194132	GUSB/CHST14/CHPF2/GLB1/HEXB/EXT2/GALNS/GNS/BGN/HSPG2/SDC1/HYAL2/HEXA/SGSH/CHST12/CHPF/FMOD/GALNT5/B3GNT5/HS2ST1/CHSY1/NFKB1/HMMR/HPSE2/SLC35D1/LUM/SLC35D2/GPC1/CD44	29
GO:2001234	negative regulation of apoptotic signaling pathway	35/1281	222/18493	4.02655e-06	0.000227961	0.000200091	RIPK1/FADD/BCL2L12/BAX/CASP8/XBP1/TXNDC12/GNAI3/PLAUR/ZC3HC1/CTNNA1/TRIAP1/NRP1/YBX3/LMNA/BRCA1/HMGB2/HDAC1/DDIAS/MMP9/LGALS3/HSPB1/PAK5/SLC35F6/PTPN1/SERPINE1/TRADD/IL7/HMOX1/TMEM161A/SOD2/SELENOS/TGFBR1/CFLAR/CD44	35
GO:0044784	metaphase/anaphase transition of cell cycle	15/1281	56/18493	4.07127e-06	0.000228117	0.000200228	CCNB1/NEK6/CDC20/TACC3/CDC6/DLGAP5/PLK1/BUB1/TRIP13/NDC80/ZNF207/CENPE/FBXO5/AURKB/MAD2L1	15
GO:0031145	anaphase-promoting complex-dependent catabolic process	12/1281	37/18493	4.22442e-06	0.000234283	0.00020564	CDK2/AURKA/CCNB1/CDC20/PTTG1/PLK1/UBE2C/CDK1/FBXO5/UBC/AURKB/MAD2L1	12
GO:0009314	response to radiation	57/1281	443/18493	4.34843e-06	0.000237844	0.000208766	IKBIP/HSPA5/PCNA/SDF4/CASP3/ITGB1/HUS1/BAX/DDB2/BAK1/NAMPT/ANXA1/BCL3/TP53I13/HOXA1/NOX4/TIPIN/CHEK2/PPP1CA/CHEK1/HYAL2/COL3A1/UBE2A/TRIAP1/ANGPT2/BRCA1/RFWD3/F11R/POLD1/ECT2/RAD51AP1/RAD51/PCLAF/TIGAR/FBXO4/TMEM109/PLK3/CXCL10/USP1/AEN/DNMT3A/RAD54L/CTNS/PTN/HMGA2/MAP3K20/CARD16/H2AFX/TMEM161A/RRM1/RAD18/ZMPSTE24/PPP1CB/FANCD2/AURKB/GADD45A/GRIN1	57
GO:0042340	keratan sulfate catabolic process	7/1281	12/18493	4.37616e-06	0.000237844	0.000208766	GLB1/HEXB/GALNS/GNS/HEXA/FMOD/LUM	7
GO:0007568	aging	44/1281	311/18493	4.82152e-06	0.000259455	0.000227735	CALR/RPN2/CASP2/IGFBP2/COL4A2/TIMP1/MBD2/BCL2L12/PRMT6/BAK1/NAMPT/NOX4/TYMS/CHEK2/NEK6/CHEK1/HYAL2/ENG/CTNNA1/STAT3/LOXL2/LMNA/NUP62/CTSC/FBXO4/SERPING1/TPRA1/ILK/FOXM1/SERPINE1/DNMT3A/RAD54L/HMGA2/H2AFX/GSS/SOD2/CDK1/FBXO5/ZMPSTE24/CGAS/CARM1/AURKB/NUDT1/IGFBP5	44
GO:0051383	kinetochore organization	9/1281	21/18493	4.89489e-06	0.000260821	0.000228933	SMC4/CENPA/CENPN/CENPK/CENPH/NDC80/NUF2/CENPE/CENPW	9
GO:0034080	CENP-A containing nucleosome assembly	13/1281	44/18493	5.44274e-06	0.000284436	0.000249661	CENPL/CENPA/RUVBL1/CENPU/CENPN/OIP5/CENPK/ITGB3BP/CENPH/HJURP/CENPM/MIS18A/CENPW	13
GO:0061641	CENP-A containing chromatin organization	13/1281	44/18493	5.44274e-06	0.000284436	0.000249661	CENPL/CENPA/RUVBL1/CENPU/CENPN/OIP5/CENPK/ITGB3BP/CENPH/HJURP/CENPM/MIS18A/CENPW	13
GO:1902749	regulation of cell cycle G2/M phase transition	29/1281	170/18493	5.55847e-06	0.000287412	0.000252273	CDK2/HUS1/AURKA/CCNB1/HAUS1/CHEK1/NEDD1/DYRK3/HAUS8/BRCA1/CDC6/RINT1/PLK1/ORC1/TUBB/ODF2/TPX2/ATF5/GTSE1/HMMR/CUL1/HMGA2/KIF14/H2AFY/CDK1/FBXO5/RCC2/CDC25C/AURKB	29
GO:0006270	DNA replication initiation	11/1281	32/18493	5.60545e-06	0.000287412	0.000252273	CDK2/MCM3/MCM2/MCM5/MCM6/POLA2/CDC6/LRWD1/ORC5/ORC1/CDC45	11
GO:0042769	DNA damage response, detection of DNA damage	12/1281	38/18493	5.7867e-06	0.000293932	0.000257996	RFC2/PCNA/POLD3/RPA3/POLD1/POLD2/RFC4/USP1/HMGA2/RPA1/RAD18/UBC	12
GO:0043122	regulation of I-kappaB kinase/NF-kappaB signaling	35/1281	226/18493	6.05536e-06	0.000304731	0.000267475	CANT1/RIPK1/FADD/SHISA5/MYD88/FLNA/CASP8/TMED4/TNFRSF1A/BCL10/MUL1/NEK6/RHOC/LGALS1/UBE2I/TRIM5/S100A4/IRAK4/HDAC1/ECT2/NUP62/HSPB1/FKBP1A/RIOK3/TFG/TNFRSF19/RHOA/TRADD/LTF/CARD16/HMOX1/CFLAR/CASP1/AJUBA/TSPAN6	35
GO:0006301	postreplication repair	14/1281	51/18493	6.21168e-06	0.000306913	0.000269391	RFC2/PCNA/POLD3/RPA3/UBE2A/BRCA1/POLD1/POLE2/PCLAF/POLD2/RFC4/RPA1/RAD18/UBC	14
GO:0030071	regulation of mitotic metaphase/anaphase transition	14/1281	51/18493	6.21168e-06	0.000306913	0.000269391	CCNB1/NEK6/CDC20/CDC6/DLGAP5/PLK1/BUB1/TRIP13/NDC80/ZNF207/CENPE/FBXO5/AURKB/MAD2L1	14
GO:0072331	signal transduction by p53 class mediator	34/1281	218/18493	6.99852e-06	0.000342675	0.000300781	CDK2/PCNA/CASP2/AURKA/BCL2L12/BAX/CCNB1/SHISA5/PRMT6/BCL3/E2F7/CHEK2/CNOT11/CHEK1/DYRK3/E2F8/TRIAP1/TAF12/BRCA1/SP100/TPX2/TMEM109/GTSE1/FOXM1/E2F4/PLK3/AEN/CDK1/ZMPSTE24/CARM1/CD44/CDC25C/AURKB/GADD45A	34
GO:0034329	cell junction assembly	36/1281	238/18493	7.7275e-06	0.000374991	0.000329145	LAMC1/MMP14/CD151/VASP/ITGA5/RAP1B/CAPZA1/FN1/FLNA/ACTB/IQGAP1/ACTN4/MYO1C/GJC1/RHOC/WDR1/TRIP6/CTNNA1/NRP1/VMP1/VEGFA/F11R/FZD5/FBLIM1/RUNX1/ECT2/CDC42/HDAC7/ACTG1/ILK/CDH18/ACTN1/RHOA/AJUBA/RCC2/EPHA2	36
GO:1902807	negative regulation of cell cycle G1/S phase transition	23/1281	121/18493	8.20808e-06	0.000394787	0.000346521	CDK2/PCNA/WEE1/CASP2/AURKA/BAX/CCNB1/E2F7/CHEK2/CNOT11/E2F8/TRIAP1/RFWD3/GTSE1/BTN2A2/E2F4/PLK3/SUSD2/EZH2/CDK1/CARM1/CDC25C/GADD45A	23
GO:0070208	protein heterotrimerization	7/1281	13/18493	8.91276e-06	0.00042492	0.00037297	COL1A2/NUP54/COL6A2/COL6A1/COL1A1/C1QTNF6/NUP62	7
GO:2000134	negative regulation of G1/S transition of mitotic cell cycle	22/1281	114/18493	9.96027e-06	0.000470731	0.00041318	CDK2/PCNA/WEE1/CASP2/AURKA/BAX/CCNB1/E2F7/CHEK2/CNOT11/E2F8/TRIAP1/RFWD3/GTSE1/BTN2A2/E2F4/PLK3/EZH2/CDK1/CARM1/CDC25C/GADD45A	22
GO:1902099	regulation of metaphase/anaphase transition of cell cycle	14/1281	53/18493	1.01361e-05	0.000474913	0.000416851	CCNB1/NEK6/CDC20/CDC6/DLGAP5/PLK1/BUB1/TRIP13/NDC80/ZNF207/CENPE/FBXO5/AURKB/MAD2L1	14
GO:0007050	cell cycle arrest	36/1281	241/18493	1.02768e-05	0.000477387	0.000419022	CALR/CDK2/PCNA/CASP2/AURKA/BAX/CCNB1/E2F7/CHEK2/CNOT11/E2F8/TRIAP1/CDKN2C/BRCA1/CDKN3/DDIAS/IRF1/CRLF3/PPM1G/GTSE1/ILK/FOXM1/E2F4/PLK3/TBRG4/CUL1/HMGA2/MAP3K20/LAMTOR2/TGFBR1/CDK1/RASSF1/CARM1/HBP1/CDC25C/GADD45A	36
GO:0006297	nucleotide-excision repair, DNA gap filling	9/1281	23/18493	1.19884e-05	0.000552176	0.000484668	RFC2/PCNA/POLD3/RPA3/POLD1/POLD2/RFC4/RPA1/UBC	9
GO:0034620	cellular response to unfolded protein	24/1281	133/18493	1.32485e-05	0.000605091	0.000531113	PDIA6/CALR/TBL2/HSPA5/DNAJB11/MYDGF/PDIA5/SHC1/DERL2/HSP90B1/BAX/BAK1/XBP1/SRPRA/KDELR3/PTPN2/BFAR/SRPRB/LMNA/PTPN1/SELENOS/CREB3L2/WIPI1/SSR1	24
GO:0032392	DNA geometric change	17/1281	76/18493	1.33934e-05	0.000606611	0.000532448	GINS4/MCM2/ANXA1/MCM6/RUVBL1/GINS2/GINS1/HMGB2/SMARCAL1/RAD51/RECQL/RAD54B/POT1/RAD54L/RPA1/G3BP1/CDC45	17
GO:0035967	cellular response to topologically incorrect protein	26/1281	151/18493	1.40647e-05	0.000631108	0.00055395	PDIA6/CALR/TBL2/HSPA5/DNAJB11/MYDGF/PDIA5/SHC1/DERL2/HSP90B1/BAX/BAK1/XBP1/SRPRA/KDELR3/SDF2L1/PTPN2/BFAR/SRPRB/LMNA/TOR1A/PTPN1/SELENOS/CREB3L2/WIPI1/SSR1	26
GO:0032465	regulation of cytokinesis	18/1281	84/18493	1.41665e-05	0.000631108	0.00055395	AURKA/E2F7/E2F8/KIF23/CDC6/KIF20A/PLK1/SH3GLB1/ECT2/NUP62/CDC42/PLK3/PRC1/RACGAP1/RHOA/ANKRD53/KIF14/AURKB	18
GO:0000083	regulation of transcription involved in G1/S transition of mitotic cell cycle	10/1281	29/18493	1.45496e-05	0.000642901	0.000564301	PCNA/E2F7/TYMS/RRM2/CDC6/ORC1/E2F4/E2F6/FBXO5/CDC45	10
GO:0031055	chromatin remodeling at centromere	13/1281	48/18493	1.55915e-05	0.000683386	0.000599837	CENPL/CENPA/RUVBL1/CENPU/CENPN/OIP5/CENPK/ITGB3BP/CENPH/HJURP/CENPM/MIS18A/CENPW	13
GO:0002478	antigen processing and presentation of exogenous peptide antigen	23/1281	126/18493	1.64033e-05	0.000713217	0.00062602	CALR/CAPZA1/IFI30/SEC24D/PDIA3/KIF18A/B2M/KIF4A/HLA-B/HLA-A/KIF2C/KIF23/TAP1/CTSL/SH3GL2/HLA-C/CAPZA2/RACGAP1/CENPE/SEC13/FCER1G/HLA-DRA/FCGR2B	23
GO:0022616	DNA strand elongation	9/1281	24/18493	1.80044e-05	0.000776619	0.000681671	PCNA/GINS4/RNASEH2A/DCLRE1B/GINS2/GINS1/POLD2/POT1/RFC4	9
GO:0034330	cell junction organization	40/1281	287/18493	1.83264e-05	0.000784282	0.000688397	LAMC1/MMP14/CD151/VASP/ITGA5/RAP1B/CAPZA1/FN1/FLNA/NECTIN2/ACTB/IQGAP1/ACTN4/MYO1C/GJC1/RHOC/WDR1/TRIP6/CTNNA1/NRP1/VMP1/VEGFA/ARF6/F11R/FZD5/FBLIM1/RUNX1/ECT2/ANG/CDC42/HDAC7/ACTG1/ILK/CDH18/ACTN1/RHOA/TGFBR1/AJUBA/RCC2/EPHA2	40
GO:0034508	centromere complex assembly	14/1281	56/18493	2.01212e-05	0.000854364	0.000749911	CENPL/CENPA/RUVBL1/CENPU/CENPN/OIP5/CENPK/ITGB3BP/CENPH/HJURP/CENPM/CENPE/MIS18A/CENPW	14
GO:0071214	cellular response to abiotic stimulus	43/1281	319/18493	2.07677e-05	0.000868251	0.0007621	HSPA5/PCNA/CASP2/CASP3/FADD/HUS1/BAX/MYD88/DDB2/CASP8/BAK1/NAMPT/TNFRSF1A/BCL10/NOX4/CHEK2/CHEK1/HYAL2/ENG/TRIAP1/COL1A1/YBX3/IRF1/POLD1/ECT2/RAD51AP1/RAD51/FBXO4/TMEM109/RELB/NFKB1/PDE2A/PTN/HMGA2/MAP3K20/CARD16/H2AFX/TMEM161A/CASP1/ZMPSTE24/SERPINB6/AURKB/GADD45A	43
GO:0104004	cellular response to environmental stimulus	43/1281	319/18493	2.07677e-05	0.000868251	0.0007621	HSPA5/PCNA/CASP2/CASP3/FADD/HUS1/BAX/MYD88/DDB2/CASP8/BAK1/NAMPT/TNFRSF1A/BCL10/NOX4/CHEK2/CHEK1/HYAL2/ENG/TRIAP1/COL1A1/YBX3/IRF1/POLD1/ECT2/RAD51AP1/RAD51/FBXO4/TMEM109/RELB/NFKB1/PDE2A/PTN/HMGA2/MAP3K20/CARD16/H2AFX/TMEM161A/CASP1/ZMPSTE24/SERPINB6/AURKB/GADD45A	43
GO:0016572	histone phosphorylation	11/1281	37/18493	2.69279e-05	0.00111648	0.00097998	CDK2/AURKA/CCNB1/CHEK1/CCNA2/HASPIN/HMGA2/H2AFY/CDK1/ZMPSTE24/AURKB	11
GO:0033045	regulation of sister chromatid segregation	17/1281	80/18493	2.73214e-05	0.00111648	0.00097998	CCNB1/NEK6/CDC20/PTTG1/TACC3/CDC6/DLGAP5/PLK1/BUB1/TRIP13/NDC80/ZNF207/CENPE/H2AFY/FBXO5/AURKB/MAD2L1	17
GO:0048013	ephrin receptor signaling pathway	17/1281	80/18493	2.73214e-05	0.00111648	0.00097998	EFNB1/ACTR3/EPHB4/MMP2/ACTB/ARPC1A/ARPC5/ARPC2/MMP9/CDC42/ACTG1/SDCBP/ARPC1B/RHOA/VAV3/EPHA2/GRIN1	17
GO:2000045	regulation of G1/S transition of mitotic cell cycle	27/1281	166/18493	2.80047e-05	0.00113319	0.00099465	CDK2/PCNA/WEE1/CASP2/AURKA/BAX/CCNB1/ANXA1/E2F7/CHEK2/CNOT11/E2F8/TRIAP1/CDC6/RFWD3/LSM10/GTSE1/BTN2A2/E2F4/PLK3/KIF14/EZH2/CDK1/CDC45/CARM1/CDC25C/GADD45A	27
GO:0044319	wound healing, spreading of cells	10/1281	31/18493	2.83559e-05	0.00113319	0.00099465	CD151/ITGA5/PDPN/FLNA/RHOC/COL5A1/TOR1A/RHOA/AJUBA/CD44	10
GO:0090505	epiboly involved in wound healing	10/1281	31/18493	2.83559e-05	0.00113319	0.00099465	CD151/ITGA5/PDPN/FLNA/RHOC/COL5A1/TOR1A/RHOA/AJUBA/CD44	10
GO:0051225	spindle assembly	20/1281	105/18493	3.0339e-05	0.0012036	0.00105645	HDAC3/AURKA/FLNA/HAUS1/CHEK2/NEK6/KIF4A/CDC20/HAUS8/KIF23/PLK1/MYBL2/TUBB/ZNF207/TPX2/RACGAP1/RHOA/MLH1/FBXO5/AURKB	20
GO:0007080	mitotic metaphase plate congression	12/1281	44/18493	3.05747e-05	0.00120416	0.00105694	CCNB1/KIF18A/CDCA8/KIF2C/NUP62/NDC80/PSRC1/BOD1/NUF2/CENPE/ANKRD53/KIF14	12
GO:0043486	histone exchange	14/1281	58/18493	3.08586e-05	0.0012066	0.00105908	CENPL/CENPA/RUVBL1/CENPU/CENPN/OIP5/CENPK/ITGB3BP/CENPH/PTMA/HJURP/CENPM/MIS18A/CENPW	14
GO:0036297	interstrand cross-link repair	13/1281	51/18493	3.16733e-05	0.0012296	0.00107927	RPA3/FAAP24/DCLRE1B/RFWD3/FANCC/RAD51AP1/RAD51/FANCI/RPA1/MCM8/FANCF/FANCD2/UBC	13
GO:0051304	chromosome separation	18/1281	89/18493	3.24603e-05	0.00125122	0.00109825	CCNB1/NEK6/CDC20/PTTG1/TACC3/CDC6/DLGAP5/PLK1/BUB1/TRIP13/NDC80/ZNF207/CENPE/NCAPH/MLH1/FBXO5/AURKB/MAD2L1	18
GO:0032963	collagen metabolic process	20/1281	106/18493	3.4996e-05	0.00133946	0.0011757	PLOD3/SERPINH1/PLOD1/MMP14/P3H1/MRC2/ITGB1/EMILIN1/MMP2/VIM/ENG/P3H4/MMP11/COL1A1/MMP9/CTSB/COL5A1/CTSL/PLOD2/TRAM2	20
GO:0015780	nucleotide-sugar transmembrane transport	6/1281	11/18493	3.72549e-05	0.00141595	0.00124284	SLC35A2/SLC35A4/SLC35C1/SLC35B1/SLC35D1/SLC35D2	6
GO:0090504	epiboly	10/1281	32/18493	3.8697e-05	0.00146054	0.00128198	CD151/ITGA5/PDPN/FLNA/RHOC/COL5A1/TOR1A/RHOA/AJUBA/CD44	10
GO:0035987	endodermal cell differentiation	12/1281	45/18493	3.9085e-05	0.00146501	0.0012859	MMP14/COL4A2/ITGA5/MMP2/FN1/COL5A2/COL6A1/MMP9/COL5A1/ITGA4/LAMB1/HMGA2	12
GO:0031638	zymogen activation	13/1281	52/18493	3.9577e-05	0.00147329	0.00129317	MMP14/ANXA2/FADD/ANXA2P2/PLAU/CASP8/BAK1/PLAT/C1R/C1RL/SERPINE1/PGK1/CTSZ	13
GO:2001233	regulation of apoptotic signaling pathway	49/1281	391/18493	4.00907e-05	0.00147923	0.00129839	P4HB/RIPK1/CASP2/FADD/TNFRSF12A/BCL2L12/BAX/PDIA3/CASP8/BAK1/XBP1/TXNDC12/BCL10/GNAI3/MUL1/PLAUR/PPP1CA/ZC3HC1/HYAL2/PTPN2/CTNNA1/TRIAP1/NRP1/YBX3/LMNA/BRCA1/HMGB2/HDAC1/DDIAS/MMP9/LGALS3/SP100/HSPB1/CTSC/PAK5/SLC35F6/PTPN1/SERPINE1/TRADD/IL7/HMOX1/TMEM161A/SOD2/SELENOS/TGFBR1/CFLAR/BCAP31/CD44/PLAGL2	49
GO:0006275	regulation of DNA replication	20/1281	107/18493	4.02809e-05	0.00147923	0.00129839	RFC2/CDK2/PCNA/S100A11/HUS1/E2F7/TIPIN/CHEK2/TIMELESS/E2F8/CCNA2/CDC6/SMARCAL1/CDC42/DBF4/DSCC1/RFC4/CDK1/FBXO5/ZMPSTE24	20
GO:0007229	integrin-mediated signaling pathway	19/1281	99/18493	4.26436e-05	0.00155549	0.00136532	ZYX/CD63/TIMP1/ITGB1/ITGA5/FLNA/ADAM9/COL3A1/CTNNA1/NRP1/LOXL3/ITGB3/CDC42/ITGA4/ILK/FCER1G/RCC2/VAV3/NME2	19
GO:0019884	antigen processing and presentation of exogenous antigen	23/1281	134/18493	4.54214e-05	0.00164577	0.00144456	CALR/CAPZA1/IFI30/SEC24D/PDIA3/KIF18A/B2M/KIF4A/HLA-B/HLA-A/KIF2C/KIF23/TAP1/CTSL/SH3GL2/HLA-C/CAPZA2/RACGAP1/CENPE/SEC13/FCER1G/HLA-DRA/FCGR2B	23
GO:1902750	negative regulation of cell cycle G2/M phase transition	14/1281	60/18493	4.6323e-05	0.00166003	0.00145708	HUS1/AURKA/CHEK1/BRCA1/CDC6/RINT1/PLK1/ORC1/ATF5/CUL1/HMGA2/H2AFY/CDK1/AURKB	14
GO:2000816	negative regulation of mitotic sister chromatid separation	11/1281	39/18493	4.64258e-05	0.00166003	0.00145708	CCNB1/CDC20/PTTG1/PLK1/BUB1/TRIP13/NDC80/ZNF207/FBXO5/AURKB/MAD2L1	11
GO:0006323	DNA packaging	31/1281	209/18493	4.73846e-05	0.00168324	0.00147745	SMC4/HAT1/ASF1B/MCM2/CENPL/CCNB1/NCAPG2/CENPA/IPO4/GRWD1/RUVBL1/CENPU/HMGB2/CENPN/OIP5/CENPK/ITGB3BP/CENPH/HIST1H2BH/NUSAP1/HJURP/CENPM/NCAPH/HMGA2/NCAPG/H2AFX/MIS18A/H2AFY/CDK1/CENPW/HIST1H2BK	31
GO:0060351	cartilage development involved in endochondral bone morphogenesis	12/1281	46/18493	4.95738e-05	0.00174957	0.00153567	SERPINH1/ANXA2/ANXA2P2/COL6A2/COL6A1/SHOX2/COL1A1/POR/POC1A/THBS3/ZMPSTE24/CARM1	12
GO:0009164	nucleoside catabolic process	10/1281	33/18493	5.2094e-05	0.00182665	0.00160333	DPYD/APOBEC3C/UPP1/AHCY/PNP/APOBEC3B/APOBEC3F/TYMP/APOBEC3G/APOBEC3D	10
GO:0006486	protein glycosylation	35/1281	250/18493	5.43717e-05	0.00188223	0.00165211	PLOD3/RPN2/DDOST/ALG3/OSTC/PMM2/STT3A/POFUT1/RPN1/EXT2/DPAGT1/GALNT2/DPY19L1/MGAT2/ALG8/MGAT4B/C1GALT1C1/ALG2/TMEM165/SLC35C1/MAGT1/OST4/MGAT1/ALG6/ALG12/GALNT5/B3GNT5/B3GALNT2/RXYLT1/ALG1/DPM1/MOGS/ST8SIA4/KRTCAP2/FUT9	35
GO:0043413	macromolecule glycosylation	35/1281	250/18493	5.43717e-05	0.00188223	0.00165211	PLOD3/RPN2/DDOST/ALG3/OSTC/PMM2/STT3A/POFUT1/RPN1/EXT2/DPAGT1/GALNT2/DPY19L1/MGAT2/ALG8/MGAT4B/C1GALT1C1/ALG2/TMEM165/SLC35C1/MAGT1/OST4/MGAT1/ALG6/ALG12/GALNT5/B3GNT5/B3GALNT2/RXYLT1/ALG1/DPM1/MOGS/ST8SIA4/KRTCAP2/FUT9	35
GO:0032355	response to estradiol	22/1281	127/18493	5.71234e-05	0.00196497	0.00172474	CALR/PCNA/CASP3/IGFBP2/RBBP8/MBD2/CASP8/ANXA1/KIF18A/SSTR1/CCNA2/COL1A1/STAT3/ARPC1B/DNMT3A/POSTN/PTN/H2AFZ/SSTR2/EZH2/CFLAR/SOCS2	22
GO:0048704	embryonic skeletal system morphogenesis	18/1281	93/18493	5.98899e-05	0.00202268	0.00177539	SLC39A1/MMP14/RDH10/HOXA1/HOXA5/SHOX2/HOXB3/HOXA3/EIF4A3/HOXA4/HOXA6/HOXB4/HOXB7/HOXA7/TGFBR1/HOXA2/HOXB2/HOXD10	18
GO:0019985	translesion synthesis	11/1281	40/18493	6.00566e-05	0.00202268	0.00177539	RFC2/PCNA/POLD3/RPA3/POLD1/POLE2/PCLAF/POLD2/RFC4/RPA1/UBC	11
GO:1905819	negative regulation of chromosome separation	11/1281	40/18493	6.00566e-05	0.00202268	0.00177539	CCNB1/CDC20/PTTG1/PLK1/BUB1/TRIP13/NDC80/ZNF207/FBXO5/AURKB/MAD2L1	11
GO:0071479	cellular response to ionizing radiation	15/1281	69/18493	6.05918e-05	0.00202268	0.00177539	HSPA5/HUS1/NAMPT/NOX4/CHEK2/ECT2/RAD51AP1/RAD51/FBXO4/TMEM109/HMGA2/MAP3K20/H2AFX/ZMPSTE24/GADD45A	15
GO:1903510	mucopolysaccharide metabolic process	20/1281	110/18493	6.06619e-05	0.00202268	0.00177539	GUSB/CHST14/CHPF2/GLB1/HEXB/GALNS/GNS/BGN/HYAL2/HEXA/CHST12/CHPF/FMOD/CHSY1/NFKB1/HMMR/SLC35D1/LUM/SLC35D2/CD44	20
GO:0042454	ribonucleoside catabolic process	8/1281	22/18493	6.89148e-05	0.00228385	0.00200463	APOBEC3C/UPP1/AHCY/PNP/APOBEC3B/APOBEC3F/APOBEC3G/APOBEC3D	8
GO:0002011	morphogenesis of an epithelial sheet	13/1281	55/18493	7.44542e-05	0.00245248	0.00215264	CD151/ITGA5/PDPN/FLNA/RHOC/JAG1/COL5A1/TOR1A/RHOA/HOXB4/HOXB2/AJUBA/CD44	13
GO:1902806	regulation of cell cycle G1/S phase transition	28/1281	185/18493	7.54604e-05	0.00247065	0.00216859	CDK2/PCNA/WEE1/CASP2/AURKA/BAX/CCNB1/ANXA1/E2F7/CHEK2/CNOT11/E2F8/TRIAP1/CDC6/RFWD3/LSM10/GTSE1/BTN2A2/E2F4/PLK3/SUSD2/KIF14/EZH2/CDK1/CDC45/CARM1/CDC25C/GADD45A	28
GO:0051052	regulation of DNA metabolic process	50/1281	412/18493	7.6961e-05	0.00250469	0.00219847	RFC2/CYREN/CDK2/PCNA/KPNA2/MBD2/S100A11/HUS1/BAX/PPP4C/E2F7/NOX4/TIPIN/PARPBP/CHEK2/CHEK1/CLCF1/PARP9/TIMELESS/E2F8/CCNA2/DTX3L/BRCA1/CDC6/PRKD2/SMARCAL1/DNAJC2/RAD51AP1/RAD51/CDC42/TIGAR/DBF4/UNG/FBXO4/DKC1/DSCC1/POT1/RFC4/FOXM1/USP1/ALYREF/HMGA2/H2AFX/TMEM161A/MIS18A/MLH1/CDK1/FBXO5/ZMPSTE24/AURKB	50
GO:0006271	DNA strand elongation involved in DNA replication	7/1281	17/18493	7.89162e-05	0.00255303	0.0022409	PCNA/GINS4/RNASEH2A/GINS2/GINS1/POLD2/RFC4	7
GO:0002009	morphogenesis of an epithelium	56/1281	479/18493	8.23224e-05	0.00264747	0.00232379	PLOD3/MMP14/PFN1/CD151/MSN/COL4A1/VASP/ITGA5/FZD1/PDPN/TMED2/FLNA/BCL10/SPRY1/RDH10/TEAD2/LIF/TGFB1I1/PPP1CA/RHOC/CLIC4/TCTN1/WDR1/PTK7/ENG/HOXA5/STIL/TIMELESS/JAG1/NRP1/VEGFA/SMO/TNC/PRKD2/FZD5/COL5A1/CDC42/IFT52/TOR1A/NKX2-5/SPRY2/ILK/CXCL10/FZD2/RHOA/HOXD11/HOXB4/HOXB7/RYK/HOXB2/AJUBA/CTHRC1/CD44/EPHA2/CTSZ/IGFBP5	56
GO:0000079	regulation of cyclin-dependent protein serine/threonine kinase activity	17/1281	87/18493	8.40268e-05	0.00267068	0.00234416	CASP3/CCNB1/CKS1B/ACTB/CCNA2/CDKN2C/CDC6/CDKN3/CCNYL1/PLK1/LATS2/CCNB2/PSRC1/CKS2/DIRAS3/CDC25C/GADD45A	17
GO:0034446	substrate adhesion-dependent cell spreading	17/1281	87/18493	8.40268e-05	0.00267068	0.00234416	CALR/LAMC1/PDPN/FN1/FLNA/ACTN4/NRP1/ARPC2/ITGB3/CDC42/ITGA4/ILK/GBP1/LAMB1/POSTN/KIF14/RCC2	17
GO:0007569	cell aging	20/1281	113/18493	8.97376e-05	0.0028356	0.00248893	CALR/BCL2L12/PRMT6/NAMPT/NOX4/CHEK2/NEK6/CHEK1/ENG/LMNA/NUP62/ILK/FOXM1/SERPINE1/HMGA2/H2AFX/CDK1/FBXO5/ZMPSTE24/CGAS	20
GO:0034656	nucleobase-containing small molecule catabolic process	12/1281	49/18493	9.68705e-05	0.00303808	0.00266665	DPYD/APOBEC3C/MGAT1/UPP1/AHCY/PNP/APOBEC3B/APOBEC3F/TYMP/APOBEC3G/NUDT1/APOBEC3D	12
GO:0015931	nucleobase-containing compound transport	33/1281	237/18493	9.75722e-05	0.00303808	0.00266665	RIPK1/NUP37/SLC35A2/SLC35A4/NUP205/CPSF4/SRSF9/NXT1/NUP54/MAGOH/SLC35C1/MYO1C/IGF2BP3/SLC35B1/NUP85/DDX39A/RAN/EIF5AL1/EIF4A3/NUP62/POLR2D/SLC25A24/IGF2BP2/ABCD1/SLC25A19/POM121C/ALYREF/SEC13/SLC35D1/SLC35D2/ENY2/SLBP/RAE1	33
GO:0033048	negative regulation of mitotic sister chromatid segregation	11/1281	42/18493	9.78224e-05	0.00303808	0.00266665	CCNB1/CDC20/PTTG1/PLK1/BUB1/TRIP13/NDC80/ZNF207/FBXO5/AURKB/MAD2L1	11
GO:0010499	proteasomal ubiquitin-independent protein catabolic process	8/1281	23/18493	9.92755e-05	0.0030657	0.00269089	PSMA2/PSMA7/PSMB8/PSMA5/PSMB9/PSMA1/PSMB2/PSMB4	8
GO:0000724	double-strand break repair via homologous recombination	21/1281	123/18493	0.000103558	0.00317988	0.00279111	GINS4/RBBP8/HUS1/RPA3/PPP4C/PARPBP/CHEK1/GINS2/BRCA1/SEM1/RFWD3/RAD51AP1/RAD51/RECQL/RAD54B/RAD54L/RPA1/H2AFX/MCM8/AP5Z1/CDC45	21
GO:0051310	metaphase plate congression	13/1281	57/18493	0.000110349	0.00336936	0.00295743	CCNB1/KIF18A/CDCA8/KIF2C/NUP62/NDC80/PSRC1/BOD1/NUF2/CENPE/ANKRD53/KIF14/MLH1	13
GO:0070085	glycosylation	35/1281	259/18493	0.000112052	0.00340226	0.0029863	PLOD3/RPN2/DDOST/ALG3/OSTC/PMM2/STT3A/POFUT1/RPN1/EXT2/DPAGT1/GALNT2/DPY19L1/MGAT2/ALG8/MGAT4B/C1GALT1C1/ALG2/TMEM165/SLC35C1/MAGT1/OST4/MGAT1/ALG6/ALG12/GALNT5/B3GNT5/B3GALNT2/RXYLT1/ALG1/DPM1/MOGS/ST8SIA4/KRTCAP2/FUT9	35
GO:0000725	recombinational repair	21/1281	124/18493	0.000116677	0.00352301	0.00309229	GINS4/RBBP8/HUS1/RPA3/PPP4C/PARPBP/CHEK1/GINS2/BRCA1/SEM1/RFWD3/RAD51AP1/RAD51/RECQL/RAD54B/RAD54L/RPA1/H2AFX/MCM8/AP5Z1/CDC45	21
GO:0034502	protein localization to chromosome	16/1281	81/18493	0.000117742	0.00352961	0.00309809	CENPA/LRWD1/PLK1/NDC80/DKC1/POT1/BOD1/HASPIN/RPA1/H2AFY/EZH2/MCM8/CDK1/RCC2/CARM1/AURKB	16
GO:0045841	negative regulation of mitotic metaphase/anaphase transition	10/1281	36/18493	0.000118195	0.00352961	0.00309809	CCNB1/CDC20/PLK1/BUB1/TRIP13/NDC80/ZNF207/FBXO5/AURKB/MAD2L1	10
GO:0001706	endoderm formation	12/1281	50/18493	0.000119509	0.00354934	0.0031154	MMP14/COL4A2/ITGA5/MMP2/FN1/COL5A2/COL6A1/MMP9/COL5A1/ITGA4/LAMB1/HMGA2	12
GO:0007596	blood coagulation	42/1281	334/18493	0.000128629	0.00379946	0.00333494	CLIC1/ANXA5/ANXA2/GGCX/ANXA2P2/VKORC1/CAPZA1/MYL12A/PDPN/PLAU/RAP2B/FLNA/PLSCR1/COL1A2/PLAT/ACTB/C1GALT1C1/PLAUR/COL3A1/COL1A1/PAFAH2/EHD2/HDAC1/RAB27A/IRF1/HSPB1/ITGB3/CDC42/ACTG1/SERPING1/LMAN1/CAPZA2/ILK/SERPINE1/ANO6/SERPINA1/SERPINA5/PROS1/FCER1G/HMG20B/SH2B3/VAV3	42
GO:0060333	interferon-gamma-mediated signaling pathway	17/1281	90/18493	0.000130327	0.0038288	0.00336069	IFNGR2/IFI30/B2M/HLA-B/HLA-A/PARP9/PTPN2/TRIM5/NMI/TRIM21/SOCS1/IRF1/SP100/HLA-C/GBP1/CD44/HLA-DRA	17
GO:0048706	embryonic skeletal system development	21/1281	125/18493	0.000131246	0.00383508	0.00336621	SLC39A1/MMP14/RDH10/HOXA1/HOXA5/SHOX2/HOXB3/COL1A1/HOXA3/EIF4A3/HOXA4/HOXA6/HOXB4/SLC35D1/HOXB7/HOXC6/HOXA7/TGFBR1/HOXA2/HOXB2/HOXD10	21
GO:0042590	antigen processing and presentation of exogenous peptide antigen via MHC class I	9/1281	30/18493	0.000134873	0.00391997	0.00344072	CALR/IFI30/PDIA3/B2M/HLA-B/HLA-A/TAP1/HLA-C/FCER1G	9
GO:0010389	regulation of G2/M transition of mitotic cell cycle	24/1281	153/18493	0.000136691	0.00395167	0.00346855	CDK2/HUS1/AURKA/CCNB1/HAUS1/NEDD1/HAUS8/BRCA1/CDC6/RINT1/PLK1/ORC1/TUBB/ODF2/TPX2/HMMR/CUL1/HMGA2/KIF14/CDK1/FBXO5/RCC2/CDC25C/AURKB	24
GO:0046135	pyrimidine nucleoside catabolic process	8/1281	24/18493	0.000139911	0.0039816	0.00349482	DPYD/APOBEC3C/UPP1/APOBEC3B/APOBEC3F/TYMP/APOBEC3G/APOBEC3D	8
GO:0032508	DNA duplex unwinding	14/1281	66/18493	0.000139912	0.0039816	0.00349482	GINS4/MCM2/ANXA1/MCM6/RUVBL1/GINS2/GINS1/RAD51/RECQL/RAD54B/POT1/RPA1/G3BP1/CDC45	14
GO:0007492	endoderm development	15/1281	74/18493	0.000140656	0.0039816	0.00349482	LAMC1/MMP14/COL4A2/ITGA5/MMP2/FN1/COL5A2/COL6A1/HDAC1/MMP9/COL5A1/PELO/ITGA4/LAMB1/HMGA2	15
GO:0051303	establishment of chromosome localization	15/1281	74/18493	0.000140656	0.0039816	0.00349482	ACTR3/CCNB1/KIF18A/CDCA8/KIF2C/DLGAP5/NUP62/NDC80/PSRC1/BOD1/NUF2/CENPE/ANKRD53/KIF14/MLH1	15
GO:1904029	regulation of cyclin-dependent protein kinase activity	17/1281	91/18493	0.000150084	0.00422645	0.00370974	CASP3/CCNB1/CKS1B/ACTB/CCNA2/CDKN2C/CDC6/CDKN3/CCNYL1/PLK1/LATS2/CCNB2/PSRC1/CKS2/DIRAS3/CDC25C/GADD45A	17
GO:0006296	nucleotide-excision repair, DNA incision, 5'-to lesion	10/1281	37/18493	0.000151997	0.00423644	0.0037185	RFC2/PCNA/POLD3/RPA3/DDB2/POLD1/POLD2/RFC4/RPA1/UBC	10
GO:1902100	negative regulation of metaphase/anaphase transition of cell cycle	10/1281	37/18493	0.000151997	0.00423644	0.0037185	CCNB1/CDC20/PLK1/BUB1/TRIP13/NDC80/ZNF207/FBXO5/AURKB/MAD2L1	10
GO:0033046	negative regulation of sister chromatid segregation	11/1281	44/18493	0.000154202	0.00427595	0.00375318	CCNB1/CDC20/PTTG1/PLK1/BUB1/TRIP13/NDC80/ZNF207/FBXO5/AURKB/MAD2L1	11
GO:0009411	response to UV	22/1281	136/18493	0.000162267	0.00447675	0.00392943	PCNA/SDF4/CASP3/HUS1/BAX/DDB2/BAK1/BCL3/TP53I13/TIPIN/CHEK1/HYAL2/UBE2A/TRIAP1/POLD1/PCLAF/USP1/PTN/CARD16/TMEM161A/RAD18/AURKB	22
GO:0050000	chromosome localization	15/1281	75/18493	0.000164719	0.00452145	0.00396867	ACTR3/CCNB1/KIF18A/CDCA8/KIF2C/DLGAP5/NUP62/NDC80/PSRC1/BOD1/NUF2/CENPE/ANKRD53/KIF14/MLH1	15
GO:0006334	nucleosome assembly	23/1281	146/18493	0.000174966	0.00477859	0.00419437	HAT1/ASF1B/MCM2/CENPL/CENPA/IPO4/GRWD1/RUVBL1/CENPU/HMGB2/CENPN/OIP5/CENPK/ITGB3BP/CENPH/HIST1H2BH/HJURP/CENPM/H2AFX/MIS18A/H2AFY/CENPW/HIST1H2BK	23
GO:0007599	hemostasis	42/1281	339/18493	0.000178577	0.004806	0.00421842	CLIC1/ANXA5/ANXA2/GGCX/ANXA2P2/VKORC1/CAPZA1/MYL12A/PDPN/PLAU/RAP2B/FLNA/PLSCR1/COL1A2/PLAT/ACTB/C1GALT1C1/PLAUR/COL3A1/COL1A1/PAFAH2/EHD2/HDAC1/RAB27A/IRF1/HSPB1/ITGB3/CDC42/ACTG1/SERPING1/LMAN1/CAPZA2/ILK/SERPINE1/ANO6/SERPINA1/SERPINA5/PROS1/FCER1G/HMG20B/SH2B3/VAV3	42
GO:0045839	negative regulation of mitotic nuclear division	12/1281	52/18493	0.000178622	0.004806	0.00421842	CCNB1/CHEK1/CDC20/PTTG1/PLK1/BUB1/TRIP13/NDC80/ZNF207/FBXO5/AURKB/MAD2L1	12
GO:0090329	regulation of DNA-dependent DNA replication	12/1281	52/18493	0.000178622	0.004806	0.00421842	RFC2/CDK2/E2F7/TIPIN/CHEK2/TIMELESS/E2F8/SMARCAL1/DSCC1/RFC4/FBXO5/ZMPSTE24	12
GO:0006488	dolichol-linked oligosaccharide biosynthetic process	7/1281	19/18493	0.000180799	0.0048406	0.00424879	ALG3/DPAGT1/ALG8/ALG2/ALG6/ALG12/ALG1	7
GO:0048284	organelle fusion	20/1281	119/18493	0.000186892	0.00497921	0.00437046	CALR/ANXA2/RAB8A/CHCHD3/ANXA2P2/RCC1L/BAX/BAK1/ANXA1/GNAI3/MUL1/RAB34/TAP1/VAT1/STX2/SAMD9/SNAPIN/CDK1/VAV3/SAMD9L	20
GO:0050817	coagulation	42/1281	340/18493	0.00019045	0.00503576	0.00442009	CLIC1/ANXA5/ANXA2/GGCX/ANXA2P2/VKORC1/CAPZA1/MYL12A/PDPN/PLAU/RAP2B/FLNA/PLSCR1/COL1A2/PLAT/ACTB/C1GALT1C1/PLAUR/COL3A1/COL1A1/PAFAH2/EHD2/HDAC1/RAB27A/IRF1/HSPB1/ITGB3/CDC42/ACTG1/SERPING1/LMAN1/CAPZA2/ILK/SERPINE1/ANO6/SERPINA1/SERPINA5/PROS1/FCER1G/HMG20B/SH2B3/VAV3	42
GO:0051985	negative regulation of chromosome segregation	11/1281	45/18493	0.000191445	0.00503576	0.00442009	CCNB1/CDC20/PTTG1/PLK1/BUB1/TRIP13/NDC80/ZNF207/FBXO5/AURKB/MAD2L1	11
GO:0051784	negative regulation of nuclear division	13/1281	60/18493	0.000191794	0.00503576	0.00442009	CCNB1/LIF/CHEK1/CDC20/PTTG1/PLK1/BUB1/TRIP13/NDC80/ZNF207/FBXO5/AURKB/MAD2L1	13
GO:0018279	protein N-linked glycosylation via asparagine	8/1281	25/18493	0.000193325	0.00505154	0.00443395	RPN2/DDOST/OSTC/STT3A/RPN1/MGAT2/MAGT1/OST4	8
GO:0002483	antigen processing and presentation of endogenous peptide antigen	6/1281	14/18493	0.000201998	0.00522789	0.00458874	B2M/HLA-B/HLA-A/TAP1/HLA-C/HFE	6
GO:0046133	pyrimidine ribonucleoside catabolic process	6/1281	14/18493	0.000201998	0.00522789	0.00458874	APOBEC3C/UPP1/APOBEC3B/APOBEC3F/APOBEC3G/APOBEC3D	6
GO:0006302	double-strand break repair	32/1281	236/18493	0.000203077	0.00523091	0.00459138	CYREN/GINS4/RBBP8/HUS1/RPA3/PPP4C/PARPBP/CHEK2/CHEK1/DCLRE1B/PARP9/TIMELESS/GINS2/DTX3L/BRCA1/SEM1/RFWD3/TRIP13/RAD51AP1/RAD51/RECQL/RAD54B/FOXM1/EXO1/RAD54L/HMGA2/RPA1/H2AFX/MLH1/MCM8/AP5Z1/CDC45	32
GO:0071478	cellular response to radiation	27/1281	186/18493	0.000204323	0.0052382	0.00459778	HSPA5/PCNA/HUS1/BAX/DDB2/BAK1/NAMPT/NOX4/CHEK2/CHEK1/HYAL2/TRIAP1/POLD1/ECT2/RAD51AP1/RAD51/FBXO4/TMEM109/PTN/HMGA2/MAP3K20/CARD16/H2AFX/TMEM161A/ZMPSTE24/AURKB/GADD45A	27
GO:0008630	intrinsic apoptotic signaling pathway in response to DNA damage	18/1281	102/18493	0.000206006	0.00525653	0.00461388	CASP2/BCL2L12/BAX/SHISA5/BAK1/BCL3/TNFRSF1A/CHEK2/TRIAP1/BRCA1/DDIAS/TMEM109/AEN/HMOX1/TMEM161A/MLH1/CD44/EPHA2	18
GO:2001020	regulation of response to DNA damage stimulus	29/1281	206/18493	0.000207855	0.00527893	0.00463354	CYREN/PCNA/BCL2L12/PPP4C/PARPBP/CHEK2/CHEK1/DYRK3/PARP9/TIMELESS/TRIAP1/DTX3L/BRCA1/RINT1/RFWD3/DDIAS/RAD51AP1/RAD51/TIGAR/WDR76/FBXO4/FOXM1/USP1/HMGA2/H2AFX/TMEM161A/FBXO5/ZMPSTE24/CD44	29
GO:0006023	aminoglycan biosynthetic process	19/1281	111/18493	0.000209882	0.00530562	0.00465696	CHST14/CHPF2/EXT2/BGN/HSPG2/SDC1/HEXA/CHST12/CHPF/FMOD/GALNT5/B3GNT5/HS2ST1/CHSY1/NFKB1/SLC35D1/LUM/SLC35D2/GPC1	19
GO:0010332	response to gamma radiation	12/1281	53/18493	0.000216518	0.00544803	0.00478196	HSPA5/BAX/BAK1/NOX4/CHEK2/TIGAR/TMEM109/CXCL10/MAP3K20/H2AFX/ZMPSTE24/FANCD2	12
GO:0007088	regulation of mitotic nuclear division	26/1281	177/18493	0.000219322	0.00549315	0.00482157	AURKA/CCNB1/NEK6/CHEK1/CDC20/CCNA2/PTTG1/TACC3/CDC6/DLGAP5/BORA/PLK1/BUB1/TRIP13/NUP62/CCNB2/NDC80/ZNF207/NUSAP1/UBE2C/CENPE/H2AFY/FBXO5/CDC25C/AURKB/MAD2L1	26
GO:0033683	nucleotide-excision repair, DNA incision	10/1281	39/18493	0.000244335	0.00609156	0.00534682	RFC2/PCNA/POLD3/RPA3/DDB2/POLD1/POLD2/RFC4/RPA1/UBC	10
GO:0071260	cellular response to mechanical stimulus	15/1281	78/18493	0.00025952	0.00642399	0.00563861	CASP2/FADD/MYD88/CASP8/BAK1/TNFRSF1A/BCL10/CHEK1/ENG/COL1A1/IRF1/NFKB1/PDE2A/CASP1/GADD45A	15
GO:0006490	oligosaccharide-lipid intermediate biosynthetic process	7/1281	20/18493	0.000261587	0.00642399	0.00563861	ALG3/DPAGT1/ALG8/ALG2/ALG6/ALG12/ALG1	7
GO:0042276	error-prone translesion synthesis	7/1281	20/18493	0.000261587	0.00642399	0.00563861	RFC2/PCNA/RPA3/POLE2/RFC4/RPA1/UBC	7
GO:0018196	peptidyl-asparagine modification	8/1281	26/18493	0.000262397	0.00642399	0.00563861	RPN2/DDOST/OSTC/STT3A/RPN1/MGAT2/MAGT1/OST4	8
GO:0010810	regulation of cell-substrate adhesion	29/1281	209/18493	0.00026684	0.00650348	0.00570838	CALR/MMP14/ITGA5/EMILIN1/PDPN/FN1/PLAU/FLNA/IQGAP1/ACTN4/LGALS1/JAG1/NRP1/COL1A1/ANGPT2/VEGFA/EMILIN2/ARPC2/CDC42/ILK/GBP1/SERPINE1/RAC2/POSTN/RHOA/PTN/HOXA7/RCC2/NID1	29
GO:0090481	pyrimidine nucleotide-sugar transmembrane transport	5/1281	10/18493	0.000297015	0.00720659	0.00632552	SLC35A2/SLC35A4/SLC35B1/SLC35D1/SLC35D2	5
GO:0051783	regulation of nuclear division	28/1281	201/18493	0.000316194	0.00763784	0.00670405	CALR/AURKA/CCNB1/LIF/NEK6/CHEK1/CDC20/CCNA2/PTTG1/TACC3/CDC6/DLGAP5/BORA/PLK1/BUB1/TRIP13/NUP62/CCNB2/NDC80/ZNF207/NUSAP1/UBE2C/CENPE/H2AFY/FBXO5/CDC25C/AURKB/MAD2L1	28
GO:0006024	glycosaminoglycan biosynthetic process	18/1281	106/18493	0.000337412	0.0081143	0.00712226	CHST14/CHPF2/EXT2/BGN/HSPG2/SDC1/HEXA/CHST12/CHPF/FMOD/GALNT5/HS2ST1/CHSY1/NFKB1/SLC35D1/LUM/SLC35D2/GPC1	18
GO:0065004	protein-DNA complex assembly	33/1281	254/18493	0.000361085	0.00864536	0.00758839	PSMC2/HAT1/ASF1B/MCM2/RPA3/CENPL/DDB2/CENPA/IPO4/GRWD1/TAF12/RUVBL1/CENPU/HMGB2/CENPN/PSMC4/OIP5/RAD51/CENPK/ITGB3BP/CENPH/HIST1H2BH/HJURP/CENPM/CENPE/RPA1/H2AFX/MIS18A/H2AFY/CDC45/UBC/CENPW/HIST1H2BK	33
GO:0000910	cytokinesis	24/1281	163/18493	0.000363324	0.00866082	0.00760196	ACTR3/AURKA/E2F7/CEP55/KIF4A/RHOC/CENPA/E2F8/KIF23/CDC6/KIF20A/PLK1/SH3GLB1/ECT2/NUP62/CDC42/NUSAP1/PLK3/PRC1/RACGAP1/RHOA/ANKRD53/KIF14/AURKB	24
GO:0006369	termination of RNA polymerase II transcription	9/1281	34/18493	0.000384463	0.00896805	0.00787163	CPSF4/CLP1/SNRPB/TTF2/ZNF473/LSM10/CSTF1/SLBP/MED18	9
GO:0007094	mitotic spindle assembly checkpoint	9/1281	34/18493	0.000384463	0.00896805	0.00787163	CCNB1/CDC20/PLK1/BUB1/TRIP13/NDC80/ZNF207/AURKB/MAD2L1	9
GO:0031577	spindle checkpoint	9/1281	34/18493	0.000384463	0.00896805	0.00787163	CCNB1/CDC20/PLK1/BUB1/TRIP13/NDC80/ZNF207/AURKB/MAD2L1	9
GO:0071173	spindle assembly checkpoint	9/1281	34/18493	0.000384463	0.00896805	0.00787163	CCNB1/CDC20/PLK1/BUB1/TRIP13/NDC80/ZNF207/AURKB/MAD2L1	9
GO:0071174	mitotic spindle checkpoint	9/1281	34/18493	0.000384463	0.00896805	0.00787163	CCNB1/CDC20/PLK1/BUB1/TRIP13/NDC80/ZNF207/AURKB/MAD2L1	9
GO:0010498	proteasomal protein catabolic process	51/1281	452/18493	0.000395222	0.00916204	0.0080419	EDEM2/HSPA5/PSMC2/CDK2/DERL2/HM13/HSP90B1/PSMA2/AURKA/CCNB1/ARAF/TMUB1/FBXL12/SEC61B/SDF2L1/PSMA7/CDC20/UBE2A/BFAR/PTTG1/UBE2I/PLK1/PSMC4/PSMB8/PSMA5/FBXO4/SDCBP/PSMB9/TOR1A/PSMA1/FBXO22/UBE2C/PLK3/HFE/CUL1/AUP1/SEC13/UBE2J2/FBXO39/SELENOS/KIF14/PSMB2/PSMD8/PSMB4/CDK1/BCAP31/FBXO5/UBC/SCO1/AURKB/MAD2L1	51
GO:0097193	intrinsic apoptotic signaling pathway	36/1281	287/18493	0.000396151	0.00916204	0.0080419	P4HB/CASP2/CASP3/CASP4/BCL2L12/BAX/SHISA5/BAK1/BCL3/XBP1/TXNDC12/TNFRSF1A/CHEK2/PLAUR/PTPN2/TRIAP1/YBX3/BRCA1/HDAC1/DDIAS/MMP9/MELK/HSPB1/TMEM109/PTPN1/AEN/CUL1/HMOX1/TMEM161A/SOD2/SELENOS/MLH1/BCAP31/CD44/EPHA2/PLAGL2	36
GO:0006998	nuclear envelope organization	11/1281	49/18493	0.00042564	0.00980235	0.00860393	TOR1B/REEP4/CCNB1/TMEM43/NEK6/LMNA/PLK1/CCNB2/TOR1A/CDK1/ZMPSTE24	11
GO:0019058	viral life cycle	36/1281	289/18493	0.000452139	0.0103687	0.00910102	P4HB/PPIB/ANXA2/ITGB1/ANXA2P2/ITGA5/PLSCR1/NECTIN2/PTX3/APOBEC3C/FAM111A/SLC52A2/PPIA/LGALS1/HYAL2/TRIM5/TRIM21/RAN/F11R/CTSB/ITGB3/CDC42/APOBEC3F/CLEC5A/APOBEC3G/CXCR4/ISG20/ZC3HAV1/HMGA2/LTF/PPIH/CDK1/UBC/EPHA2/APOBEC3D/TNFRSF14	36
GO:0042730	fibrinolysis	8/1281	28/18493	0.000461016	0.0105278	0.00924071	ANXA2/ANXA2P2/PLAU/PLAT/PLAUR/SERPING1/SERPINE1/PROS1	8
GO:2001236	regulation of extrinsic apoptotic signaling pathway	23/1281	156/18493	0.000467895	0.0106224	0.00932376	RIPK1/FADD/TNFRSF12A/PDIA3/CASP8/BCL10/PPP1CA/ZC3HC1/HYAL2/CTNNA1/NRP1/LMNA/BRCA1/HMGB2/LGALS3/SP100/PAK5/SERPINE1/TRADD/IL7/HMOX1/TGFBR1/CFLAR	23
GO:0051216	cartilage development	28/1281	206/18493	0.000473814	0.0106224	0.00932376	SERPINH1/BMP1/ANXA2/TIMP1/ANXA2P2/COL6A2/TYMS/COL6A1/HYAL2/HOXA5/SHOX2/CHI3L1/HOXB3/COL1A1/LOXL2/HOXA3/POR/POC1A/TGFBI/CHSY1/HMGA2/LUM/THBS3/TGFBR1/CREB3L2/ZMPSTE24/CARM1/CD44	28
GO:0031497	chromatin assembly	24/1281	166/18493	0.00047706	0.0106224	0.00932376	HAT1/ASF1B/MCM2/CENPL/CENPA/IPO4/GRWD1/RUVBL1/CENPU/HMGB2/CENPN/OIP5/CENPK/ITGB3BP/CENPH/HIST1H2BH/HJURP/CENPM/HMGA2/H2AFX/MIS18A/H2AFY/CENPW/HIST1H2BK	24
GO:0000076	DNA replication checkpoint	6/1281	16/18493	0.00047753	0.0106224	0.00932376	HUS1/TIPIN/TIMELESS/CDC6/ORC1/CDC45	6
GO:0030214	hyaluronan catabolic process	6/1281	16/18493	0.00047753	0.0106224	0.00932376	GUSB/HEXB/HYAL2/HEXA/HMMR/CD44	6
GO:0051382	kinetochore assembly	6/1281	16/18493	0.00047753	0.0106224	0.00932376	CENPA/CENPN/CENPK/CENPH/CENPE/CENPW	6
GO:0006289	nucleotide-excision repair	18/1281	109/18493	0.00047884	0.0106224	0.00932376	RFC2/PCNA/RBBP8/HUS1/POLD3/RPA3/DDB2/POLR2L/POLD1/FANCC/POLR2D/COPS6/POLR2J/POLD2/RFC4/NEIL3/RPA1/UBC	18
GO:0006353	DNA-templated transcription, termination	14/1281	74/18493	0.000490466	0.0108361	0.00951131	XRN2/TWISTNB/CPSF4/CLP1/CAVIN1/POLR2L/SNRPB/TTF2/ZNF473/LSM10/CSTF1/ZMPSTE24/SLBP/MED18	14
GO:0043161	proteasome-mediated ubiquitin-dependent protein catabolic process	45/1281	389/18493	0.000498461	0.0109682	0.00962721	EDEM2/HSPA5/CDK2/DERL2/HSP90B1/PSMA2/AURKA/CCNB1/ARAF/TMUB1/FBXL12/SEC61B/PSMA7/CDC20/UBE2A/BFAR/PTTG1/UBE2I/PLK1/PSMB8/PSMA5/FBXO4/SDCBP/PSMB9/PSMA1/FBXO22/UBE2C/PLK3/HFE/CUL1/AUP1/SEC13/UBE2J2/FBXO39/SELENOS/KIF14/PSMB2/PSMD8/PSMB4/CDK1/BCAP31/FBXO5/UBC/AURKB/MAD2L1	45
GO:0071459	protein localization to chromosome, centromeric region	7/1281	22/18493	0.000509098	0.011157	0.00979301	CENPA/NDC80/BOD1/HASPIN/CDK1/RCC2/AURKB	7
GO:0000731	DNA synthesis involved in DNA repair	11/1281	50/18493	0.000511985	0.0111631	0.00979831	RFC2/PCNA/POLD3/RPA3/POLD1/POLE2/PCLAF/POLD2/RFC4/RPA1/UBC	11
GO:1902969	mitotic DNA replication	5/1281	11/18493	0.000513482	0.0111631	0.00979831	CHEK2/GINS1/RAD51/ZMPSTE24/CDC45	5
GO:0001666	response to hypoxia	38/1281	314/18493	0.000562395	0.0121778	0.0106889	P4HB/TBL2/PLOD1/MMP14/CASP3/HSP90B1/MMP2/PLAU/CCNB1/PLAT/NOX4/ACTN4/CCNA2/LDHA/ANGPT2/LOXL2/VEGFA/LMNA/AHCY/HILPDA/ANG/PDLIM1/TIGAR/PLK3/PLOD2/DNMT3A/CXCR4/CHRNA4/POSTN/RHOA/AGTRAP/PTN/CARD16/HMOX1/CFLAR/AJUBA/UBC/PGK1	38
GO:0036293	response to decreased oxygen levels	39/1281	325/18493	0.000566068	0.0122087	0.010716	P4HB/TBL2/PLOD1/MMP14/CASP3/HSP90B1/MMP2/PLAU/CCNB1/NAMPT/PLAT/NOX4/ACTN4/CCNA2/LDHA/ANGPT2/LOXL2/VEGFA/LMNA/AHCY/HILPDA/ANG/PDLIM1/TIGAR/PLK3/PLOD2/DNMT3A/CXCR4/CHRNA4/POSTN/RHOA/AGTRAP/PTN/CARD16/HMOX1/CFLAR/AJUBA/UBC/PGK1	39
GO:0071346	cellular response to interferon-gamma	25/1281	178/18493	0.000571335	0.0122735	0.010773	ZYX/IFNGR2/ACTR3/IFI30/VIM/B2M/CD58/MYO1C/HLA-B/HLA-A/PARP9/PTPN2/TRIM5/NMI/TRIM21/SOCS1/IRF1/SP100/ACTG1/HLA-C/GBP1/GAPDH/CASP1/CD44/HLA-DRA	25
GO:0030970	retrograde protein transport, ER to cytosol	8/1281	29/18493	0.000598335	0.012724	0.0111683	EDEM2/DERL2/HM13/HSP90B1/SEC61B/AUP1/SELENOS/BCAP31	8
GO:1903513	endoplasmic reticulum to cytosol transport	8/1281	29/18493	0.000598335	0.012724	0.0111683	EDEM2/DERL2/HM13/HSP90B1/SEC61B/AUP1/SELENOS/BCAP31	8
GO:0043200	response to amino acid	18/1281	111/18493	0.000599325	0.012724	0.0111683	PCNA/CASP3/COL4A1/MMP2/COL1A2/XBP1/COL5A2/COL6A1/CPEB3/COL3A1/COL1A1/SOCS1/DNMT3A/RHOA/PTN/GSS/LAMTOR2/GRIN1	18
GO:0003417	growth plate cartilage development	9/1281	36/18493	0.000608678	0.0128722	0.0112985	ANXA2/ANXA2P2/COL6A2/COL6A1/POR/POC1A/THBS3/ZMPSTE24/CARM1	9
GO:0006213	pyrimidine nucleoside metabolic process	11/1281	51/18493	0.000612484	0.0129025	0.0113251	DPYD/APOBEC3C/UMPS/TK1/UPP1/APOBEC3B/APOBEC3F/TYMP/APOBEC3G/NME2/APOBEC3D	11
GO:0043901	negative regulation of multi-organism process	24/1281	169/18493	0.000620803	0.0130273	0.0114346	CALR/PRDX4/ANXA2/TIMP1/ANXA2P2/PLSCR1/PTX3/MUL1/APOBEC3C/FAM111A/TRIM5/TRIM21/HDAC1/RIOK3/APOBEC3F/APOBEC3G/ISG20/ZC3HAV1/HMGA2/LTF/CARD16/ARHGDIB/TSPAN6/APOBEC3D	24
GO:0051054	positive regulation of DNA metabolic process	29/1281	220/18493	0.000630128	0.0131721	0.0115617	RFC2/CDK2/PCNA/BAX/E2F7/NOX4/CLCF1/PARP9/TIMELESS/E2F8/DTX3L/BRCA1/PRKD2/RAD51/CDC42/TIGAR/DBF4/UNG/FBXO4/DKC1/DSCC1/POT1/RFC4/FOXM1/H2AFX/TMEM161A/MLH1/CDK1/AURKB	29
GO:1903900	regulation of viral life cycle	21/1281	140/18493	0.000643019	0.0133901	0.011753	P4HB/PPIB/ANXA2/ANXA2P2/PLSCR1/NECTIN2/PTX3/APOBEC3C/FAM111A/PPIA/LGALS1/TRIM5/TRIM21/APOBEC3F/APOBEC3G/ISG20/ZC3HAV1/HMGA2/LTF/PPIH/APOBEC3D	21
GO:0046718	viral entry into host cell	19/1281	121/18493	0.000645524	0.0133909	0.0117538	P4HB/ITGB1/ITGA5/NECTIN2/PTX3/SLC52A2/PPIA/LGALS1/HYAL2/TRIM5/TRIM21/F11R/CTSB/ITGB3/CLEC5A/CXCR4/CDK1/EPHA2/TNFRSF14	19
GO:0090305	nucleic acid phosphodiester bond hydrolysis	36/1281	295/18493	0.000664545	0.0137331	0.0120541	ERI1/RFC2/PCNA/CASP3/APEX2/MGME1/XRN2/RBBP8/POLD3/CPSF4/RPA3/BAX/REXO2/DDB2/RNASEH2A/DCPS/DCLRE1B/RRP36/HMGB2/POLD1/TSEN34/ANG/PELO/POLD2/ZC3H12B/RFC4/MOV10/AEN/ISG20/EXO1/RPA1/POP4/G3BP1/RNASE4/UBC/NOP14	36
GO:1903829	positive regulation of cellular protein localization	38/1281	318/18493	0.000716906	0.0147161	0.0129169	CNPY4/EDEM2/MSN/ITGB1/HDAC3/FLNA/CASP8/IQGAP1/LIF/MYO1C/HYAL2/PARP9/TCAF2/PTPN9/DTX3L/SMO/ARF6/PLK1/SH3GLB1/FZD5/ECT2/LGALS3/RER1/KCNB1/NUP62/CDC42/NDC80/DKC1/GTSE1/PLK3/RAC2/PTN/CACNG2/UBE2J2/FCER1G/CDK1/BCAP31/EPHA2	38
GO:0006979	response to oxidative stress	49/1281	441/18493	0.000717528	0.0147161	0.0129169	P4HB/RIPK1/CDK2/PCNA/MMP14/PRDX4/CASP3/SELENON/GPX8/GPX7/FZD1/BAK1/ANXA1/NOX4/SDC1/ADAM9/IDH1/HYAL2/CCNA2/COL1A1/LDHA/MMP9/MPV17/MELK/ECT2/FANCC/PDLIM1/HSPB1/SLC25A24/ABCD1/TOR1A/ADPRHL2/PLK3/PXN/CHRNA4/STX2/CA3/GSS/HMOX1/TMEM161A/SOD2/SELENOS/H2AFY/EZH2/CFLAR/CDK1/FANCD2/NME2/NUDT1	49
GO:0051028	mRNA transport	22/1281	151/18493	0.000724493	0.0147521	0.0129486	NUP37/NUP205/CPSF4/SRSF9/NXT1/NUP54/MAGOH/MYO1C/IGF2BP3/NUP85/DDX39A/EIF5AL1/EIF4A3/NUP62/POLR2D/IGF2BP2/POM121C/ALYREF/SEC13/ENY2/SLBP/RAE1	22
GO:0090307	mitotic spindle assembly	12/1281	60/18493	0.000724713	0.0147521	0.0129486	FLNA/CHEK2/KIF4A/CDC20/KIF23/PLK1/MYBL2/ZNF207/TPX2/RACGAP1/RHOA/AURKB	12
GO:0007160	cell-matrix adhesion	29/1281	222/18493	0.000730037	0.014805	0.012995	ZYX/MMP14/CD63/ITGB1/EMILIN1/FN1/PLAU/IQGAP1/ADAM9/TRIP6/COL3A1/JAG1/NRP1/VEGFA/ITGB3/ITGA4/ILK/SERPINE1/ACTN1/PXN/POSTN/RHOA/THBS3/NID2/HOXA7/AJUBA/RCC2/NID1/CD44	29
GO:0034728	nucleosome organization	25/1281	181/18493	0.000733106	0.014812	0.0130011	HAT1/ASF1B/MCM2/CENPL/CENPA/IPO4/GRWD1/RUVBL1/CENPU/HMGB2/CENPN/OIP5/CENPK/ITGB3BP/CENPH/PTMA/HIST1H2BH/HJURP/SMARCE1/CENPM/H2AFX/MIS18A/H2AFY/CENPW/HIST1H2BK	25
GO:0032467	positive regulation of cytokinesis	9/1281	37/18493	0.000755468	0.0151512	0.0132988	KIF23/CDC6/ECT2/NUP62/CDC42/RACGAP1/RHOA/KIF14/AURKB	9
GO:1902042	negative regulation of extrinsic apoptotic signaling pathway via death domain receptors	9/1281	37/18493	0.000755468	0.0151512	0.0132988	RIPK1/FADD/CASP8/BRCA1/HMGB2/SERPINE1/TRADD/HMOX1/CFLAR	9
GO:2001237	negative regulation of extrinsic apoptotic signaling pathway	17/1281	104/18493	0.000765828	0.0153025	0.0134316	RIPK1/FADD/CASP8/ZC3HC1/CTNNA1/NRP1/LMNA/BRCA1/HMGB2/LGALS3/PAK5/SERPINE1/TRADD/IL7/HMOX1/TGFBR1/CFLAR	17
GO:0006029	proteoglycan metabolic process	15/1281	86/18493	0.000769344	0.0153164	0.0134439	CHST14/CHPF2/CANT1/HEXB/EXT2/GAL3ST4/BGN/HEXA/SGSH/CHST12/CHPF/HS2ST1/CHSY1/SLC35D1/GPC1	15
GO:0051302	regulation of cell division	23/1281	162/18493	0.000800501	0.0156664	0.013751	AURKA/E2F7/MDK/E2F8/VEGFA/KIF23/CDC6/KIF20A/PLK1/SH3GLB1/ECT2/NUP62/CDC42/MACC1/PLK3/PRC1/RACGAP1/RHOA/PTN/SUSD2/ANKRD53/KIF14/AURKB	23
GO:0030260	entry into host cell	20/1281	133/18493	0.000828457	0.0156664	0.013751	P4HB/ITGB1/ITGA5/NECTIN2/PTX3/SLC52A2/PPIA/LGALS1/HYAL2/TRIM5/FUCA2/TRIM21/F11R/CTSB/ITGB3/CLEC5A/CXCR4/CDK1/EPHA2/TNFRSF14	20
GO:0044409	entry into host	20/1281	133/18493	0.000828457	0.0156664	0.013751	P4HB/ITGB1/ITGA5/NECTIN2/PTX3/SLC52A2/PPIA/LGALS1/HYAL2/TRIM5/FUCA2/TRIM21/F11R/CTSB/ITGB3/CLEC5A/CXCR4/CDK1/EPHA2/TNFRSF14	20
GO:0051806	entry into cell of other organism involved in symbiotic interaction	20/1281	133/18493	0.000828457	0.0156664	0.013751	P4HB/ITGB1/ITGA5/NECTIN2/PTX3/SLC52A2/PPIA/LGALS1/HYAL2/TRIM5/FUCA2/TRIM21/F11R/CTSB/ITGB3/CLEC5A/CXCR4/CDK1/EPHA2/TNFRSF14	20
GO:0051828	entry into other organism involved in symbiotic interaction	20/1281	133/18493	0.000828457	0.0156664	0.013751	P4HB/ITGB1/ITGA5/NECTIN2/PTX3/SLC52A2/PPIA/LGALS1/HYAL2/TRIM5/FUCA2/TRIM21/F11R/CTSB/ITGB3/CLEC5A/CXCR4/CDK1/EPHA2/TNFRSF14	20
GO:0000022	mitotic spindle elongation	5/1281	12/18493	0.000830159	0.0156664	0.013751	KIF4A/KIF23/PRC1/RACGAP1/AURKB	5
GO:0006216	cytidine catabolic process	5/1281	12/18493	0.000830159	0.0156664	0.013751	APOBEC3C/APOBEC3B/APOBEC3F/APOBEC3G/APOBEC3D	5
GO:0007077	mitotic nuclear envelope disassembly	5/1281	12/18493	0.000830159	0.0156664	0.013751	CCNB1/NEK6/PLK1/CCNB2/CDK1	5
GO:0009972	cytidine deamination	5/1281	12/18493	0.000830159	0.0156664	0.013751	APOBEC3C/APOBEC3B/APOBEC3F/APOBEC3G/APOBEC3D	5
GO:0016554	cytidine to uridine editing	5/1281	12/18493	0.000830159	0.0156664	0.013751	APOBEC3C/APOBEC3B/APOBEC3F/APOBEC3G/APOBEC3D	5
GO:0035437	maintenance of protein localization in endoplasmic reticulum	5/1281	12/18493	0.000830159	0.0156664	0.013751	KDELR2/HSPA5/KDELR1/KDELR3/RER1	5
GO:0045091	regulation of single stranded viral RNA replication via double stranded DNA intermediate	5/1281	12/18493	0.000830159	0.0156664	0.013751	APOBEC3C/APOBEC3F/APOBEC3G/HMGA2/APOBEC3D	5
GO:0046087	cytidine metabolic process	5/1281	12/18493	0.000830159	0.0156664	0.013751	APOBEC3C/APOBEC3B/APOBEC3F/APOBEC3G/APOBEC3D	5
GO:0051988	regulation of attachment of spindle microtubules to kinetochore	5/1281	12/18493	0.000830159	0.0156664	0.013751	CCNB1/ECT2/CDC42/RACGAP1/RCC2	5
GO:1903894	regulation of IRE1-mediated unfolded protein response	5/1281	12/18493	0.000830159	0.0156664	0.013751	HSPA5/BAX/BAK1/BFAR/PTPN1	5
GO:0097191	extrinsic apoptotic signaling pathway	29/1281	224/18493	0.000843549	0.015864	0.0139245	RIPK1/CASP2/CASP3/FADD/TNFRSF12A/BAX/PDIA3/CASP8/BAK1/TNFRSF1A/BCL10/PPP1CA/ZC3HC1/HYAL2/CTNNA1/NRP1/LMNA/BRCA1/HMGB2/LGALS3/SP100/DDX47/PAK5/SERPINE1/TRADD/IL7/HMOX1/TGFBR1/CFLAR	29
GO:1905897	regulation of response to endoplasmic reticulum stress	14/1281	78/18493	0.00085004	0.0159255	0.0139785	EDEM2/HSPA5/MANF/DERL2/BAX/BAK1/XBP1/TXNDC12/PTPN2/BFAR/PTPN1/SELENOS/BCAP31/FCGR2B	14
GO:1901657	glycosyl compound metabolic process	21/1281	143/18493	0.000852681	0.0159255	0.0139785	GUSB/GLA/DPYD/GNAI3/APOBEC3C/UMPS/TK1/UPP1/NAGA/FUCA2/RAN/AHCY/GMPS/PNP/APOBEC3B/APOBEC3F/TYMP/APOBEC3G/RHOA/NME2/APOBEC3D	21
GO:0051656	establishment of organelle localization	53/1281	491/18493	0.000873211	0.0162531	0.014266	TMED9/ACTR3/RAP1B/TMED2/SEC24D/CCNB1/NECTIN2/TMEM230/KIF18A/SPRY1/YKT6/ACTN4/MYO1C/CDCA8/CENPA/BET1/KIF2C/KIF23/RAN/STARD3NL/RAB27A/DLGAP5/TMED10/NUP62/CDC42/CTSC/NDC80/PSRC1/NUSAP1/ITGA4/LMAN1/TOR1A/BOD1/SPRY2/TFG/DNM3/NUF2/RAC2/CHRNA4/CENPE/SERPINA1/SEC13/STX2/HMOX1/ANKRD53/KIF14/BLOC1S5/RIMS2/MLH1/SNAPIN/FCER1G/WIPI1/CTSZ	53
GO:0009612	response to mechanical stimulus	27/1281	204/18493	0.000895428	0.0166097	0.0145791	MMP14/CASP2/IGFBP2/FADD/MBD2/CCNB1/MYD88/CASP8/BAK1/TNFRSF1A/BCL10/CHEK1/ENG/COL3A1/CHI3L1/COL1A1/ANGPT2/TNC/IRF1/CXCL10/NFKB1/POSTN/RHOA/PDE2A/CASP1/CHRNA9/GADD45A	27
GO:0031639	plasminogen activation	7/1281	24/18493	0.000914242	0.0168437	0.0147845	ANXA2/ANXA2P2/PLAU/PLAT/SERPINE1/PGK1/CTSZ	7
GO:1900120	regulation of receptor binding	7/1281	24/18493	0.000914242	0.0168437	0.0147845	ANXA2/ANXA2P2/B2M/NRP1/HOXA3/MMP9/HFE	7
GO:0071824	protein-DNA complex subunit organization	35/1281	290/18493	0.000955451	0.0175435	0.0153987	PSMC2/HAT1/ASF1B/MCM2/RPA3/CENPL/DDB2/CENPA/IPO4/GRWD1/TAF12/RUVBL1/CENPU/HMGB2/CENPN/PSMC4/OIP5/RAD51/CENPK/ITGB3BP/CENPH/PTMA/HIST1H2BH/HJURP/SMARCE1/CENPM/CENPE/RPA1/H2AFX/MIS18A/H2AFY/CDC45/UBC/CENPW/HIST1H2BK	35
GO:0032233	positive regulation of actin filament bundle assembly	12/1281	62/18493	0.000984294	0.0180122	0.0158101	PFN1/FLNA/NOX4/RHOC/NRP1/CDC42/PXN/RHOA/SH3PXD2B/GPR65/TGFBR1/SWAP70	12
GO:0031503	protein-containing complex localization	34/1281	280/18493	0.00100793	0.0183828	0.0161354	NUP37/RAB8A/TTC26/NUP205/CPSF4/SRSF9/NXT1/IFT22/NUP54/WDR34/MAGOH/NUP85/DDX39A/RAN/EIF4A3/EXOC3L2/NUP62/ITGB3/MIOS/POLR2D/IFT52/BIRC5/DNM3/CEP112/HASPIN/POM121C/CACNG2/ALYREF/SEC13/SNAPIN/ENY2/SLBP/RCC2/RAE1	34
GO:0006338	chromatin remodeling	23/1281	165/18493	0.00103283	0.0187741	0.0164788	ACTL6A/MBD2/CENPL/ACTB/CHEK1/CENPA/RUVBL1/CENPU/HMGB2/HDAC1/CENPN/CBX3/OIP5/CENPK/ITGB3BP/CENPH/PTMA/HJURP/SMARCE1/CENPM/HMGA2/MIS18A/CENPW	23
GO:0060350	endochondral bone morphogenesis	13/1281	71/18493	0.00106125	0.0192263	0.0168757	SERPINH1/MMP14/ANXA2/ANXA2P2/COL6A2/COL6A1/SHOX2/COL1A1/POR/POC1A/THBS3/ZMPSTE24/CARM1	13
GO:0019886	antigen processing and presentation of exogenous peptide antigen via MHC class II	16/1281	98/18493	0.00109515	0.0197746	0.017357	CAPZA1/IFI30/SEC24D/KIF18A/KIF4A/KIF2C/KIF23/CTSL/SH3GL2/CAPZA2/RACGAP1/CENPE/SEC13/FCER1G/HLA-DRA/FCGR2B	16
GO:0072529	pyrimidine-containing compound catabolic process	9/1281	39/18493	0.0011355	0.0204352	0.0179368	DPYD/APOBEC3C/UPP1/UNG/APOBEC3B/APOBEC3F/TYMP/APOBEC3G/APOBEC3D	9
GO:0070482	response to oxygen levels	40/1281	349/18493	0.00118783	0.0213064	0.0187015	P4HB/TBL2/PLOD1/MMP14/CASP3/HSP90B1/MMP2/PLAU/CCNB1/NAMPT/PLAT/NOX4/ACTN4/CCNA2/COL1A1/LDHA/ANGPT2/LOXL2/VEGFA/LMNA/AHCY/HILPDA/ANG/PDLIM1/TIGAR/PLK3/PLOD2/DNMT3A/CXCR4/CHRNA4/POSTN/RHOA/AGTRAP/PTN/CARD16/HMOX1/CFLAR/AJUBA/UBC/PGK1	40
GO:1900101	regulation of endoplasmic reticulum unfolded protein response	7/1281	25/18493	0.0011946	0.0213491	0.018739	HSPA5/BAX/BAK1/XBP1/PTPN2/BFAR/PTPN1	7
GO:0035722	interleukin-12-mediated signaling pathway	10/1281	47/18493	0.00119977	0.0213491	0.018739	P4HB/MSN/ANXA2/RAP1B/CAPZA1/PPIA/HNRNPF/CDC42/LMNB1/SOD2	10
GO:0060348	bone development	27/1281	208/18493	0.00120199	0.0213491	0.018739	SERPINH1/FAM20C/PPIB/MMP14/P3H1/ANXA2/ANXA2P2/VKORC1/COL6A2/COL6A1/ENG/SHOX2/COL1A1/POR/POC1A/CHSY1/RIPPLY2/RHOA/HOXB4/ANO6/LTF/SFRP4/PLS3/THBS3/SH3PXD2B/ZMPSTE24/CARM1	27
GO:0034341	response to interferon-gamma	26/1281	198/18493	0.00123973	0.0219477	0.0192644	ZYX/SEC61A1/IFNGR2/ACTR3/IFI30/VIM/B2M/CD58/MYO1C/HLA-B/HLA-A/PARP9/PTPN2/TRIM5/NMI/TRIM21/SOCS1/IRF1/SP100/ACTG1/HLA-C/GBP1/GAPDH/CASP1/CD44/HLA-DRA	26
GO:0039692	single stranded viral RNA replication via double stranded DNA intermediate	5/1281	13/18493	0.00127238	0.0220354	0.0193414	APOBEC3C/APOBEC3F/APOBEC3G/HMGA2/APOBEC3D	5
GO:0051231	spindle elongation	5/1281	13/18493	0.00127238	0.0220354	0.0193414	KIF4A/KIF23/PRC1/RACGAP1/AURKB	5
GO:0051255	spindle midzone assembly	5/1281	13/18493	0.00127238	0.0220354	0.0193414	KIF4A/KIF23/RACGAP1/MLH1/AURKB	5
GO:0051315	attachment of mitotic spindle microtubules to kinetochore	5/1281	13/18493	0.00127238	0.0220354	0.0193414	KIF2C/NDC80/BOD1/NUF2/CENPE	5
GO:1900103	positive regulation of endoplasmic reticulum unfolded protein response	5/1281	13/18493	0.00127238	0.0220354	0.0193414	BAX/BAK1/XBP1/PTPN2/PTPN1	5
GO:2001044	regulation of integrin-mediated signaling pathway	5/1281	13/18493	0.00127238	0.0220354	0.0193414	CD63/TIMP1/FLNA/CTNNA1/LOXL3	5
GO:1903046	meiotic cell cycle process	25/1281	188/18493	0.00127307	0.0220354	0.0193414	CALR/SMC4/HUS1/ACTR3/AURKA/KIF18A/LIF/SGO2/P3H4/CDC20/PTTG1/PLK1/BUB1/TRIP13/RAD51/RAD54B/CKS2/NUF2/EXO1/NCAPH/SGO1/MLH1/FBXO5/FANCD2/CDC25C	25
GO:0002576	platelet degranulation	19/1281	128/18493	0.00129339	0.0223161	0.0195877	MANF/TAGLN2/CD63/ANXA5/TIMP1/FN1/FLNA/ACTN4/WDR1/LGALS3BP/VEGFA/ITGB3/SERPING1/SERPINE1/ACTN1/SERPINA1/SERPINA3/PROS1/FCER1G	19
GO:0051170	import into nucleus	24/1281	178/18493	0.00130071	0.0223713	0.0196362	HDAC3/KPNA2/FLNA/NXT1/BCL3/NUP54/SEC61B/IPO4/HYAL2/NUP85/STAT3/LMNA/SMO/GEMIN6/RAN/SNRPB/ECT2/NUP62/SNRPD2/GEMIN7/POM121C/PDE2A/CDK1/HEATR3	24
GO:0061448	connective tissue development	32/1281	263/18493	0.00135021	0.0230242	0.0202093	SERPINH1/BMP1/ANXA2/TIMP1/ANXA2P2/XBP1/COL6A2/TYMS/COL6A1/HYAL2/HOXA5/SHOX2/CHI3L1/HOXB3/COL1A1/LOXL2/HOXA3/POR/COL5A1/POC1A/TGFBI/CHSY1/HMGA2/LUM/THBS3/SH3PXD2B/TGFBR1/CFLAR/CREB3L2/ZMPSTE24/CARM1/CD44	32
GO:0045737	positive regulation of cyclin-dependent protein serine/threonine kinase activity	6/1281	19/18493	0.00135138	0.0230242	0.0202093	CCNB1/CKS1B/CDC6/CCNYL1/PSRC1/CKS2	6
GO:0070987	error-free translesion synthesis	6/1281	19/18493	0.00135138	0.0230242	0.0202093	RFC2/PCNA/RPA3/RFC4/RPA1/UBC	6
GO:0006283	transcription-coupled nucleotide-excision repair	13/1281	73/18493	0.00138567	0.0235348	0.0206575	RFC2/PCNA/POLD3/RPA3/POLR2L/POLD1/POLR2D/COPS6/POLR2J/POLD2/RFC4/RPA1/UBC	13
GO:0010972	negative regulation of G2/M transition of mitotic cell cycle	10/1281	48/18493	0.00142291	0.024092	0.0211466	HUS1/AURKA/BRCA1/CDC6/RINT1/ORC1/CUL1/HMGA2/CDK1/AURKB	10
GO:1902905	positive regulation of supramolecular fiber organization	26/1281	200/18493	0.00143532	0.0242266	0.0212647	COLGALT1/PFN1/VASP/ACTR3/FLNA/NOX4/ARPC1A/MYO1C/RHOC/WDR1/ARPC5/NRP1/ARF6/ARPC2/CDC42/PSRC1/IQGAP2/ARPC1B/PXN/RHOA/SLAIN2/ANKRD53/SH3PXD2B/GPR65/TGFBR1/SWAP70	26
GO:0006406	mRNA export from nucleus	17/1281	110/18493	0.00145464	0.0244011	0.0214179	NUP37/NUP205/CPSF4/SRSF9/NXT1/NUP54/MAGOH/NUP85/DDX39A/EIF4A3/NUP62/POLR2D/POM121C/ALYREF/ENY2/SLBP/RAE1	17
GO:0071427	mRNA-containing ribonucleoprotein complex export from nucleus	17/1281	110/18493	0.00145464	0.0244011	0.0214179	NUP37/NUP205/CPSF4/SRSF9/NXT1/NUP54/MAGOH/NUP85/DDX39A/EIF4A3/NUP62/POLR2D/POM121C/ALYREF/ENY2/SLBP/RAE1	17
GO:0042339	keratan sulfate metabolic process	8/1281	33/18493	0.00151099	0.0251139	0.0220435	GLB1/HEXB/GALNS/GNS/HEXA/FMOD/LUM/SLC35D2	8
GO:0097502	mannosylation	8/1281	33/18493	0.00151099	0.0251139	0.0220435	ALG3/DPY19L1/ALG8/ALG2/ALG12/RXYLT1/ALG1/DPM1	8
GO:1901976	regulation of cell cycle checkpoint	8/1281	33/18493	0.00151099	0.0251139	0.0220435	CCNB1/CHEK2/RINT1/RFWD3/WDR76/NDC80/FBXO4/MAD2L1	8
GO:0002495	antigen processing and presentation of peptide antigen via MHC class II	16/1281	101/18493	0.00152036	0.0251159	0.0220453	CAPZA1/IFI30/SEC24D/KIF18A/KIF4A/KIF2C/KIF23/CTSL/SH3GL2/CAPZA2/RACGAP1/CENPE/SEC13/FCER1G/HLA-DRA/FCGR2B	16
GO:0072527	pyrimidine-containing compound metabolic process	16/1281	101/18493	0.00152036	0.0251159	0.0220453	DTYMK/DPYD/APOBEC3C/TYMS/UMPS/TK1/UPP1/UNG/APOBEC3B/APOBEC3F/TYMP/SLC25A19/APOBEC3G/RRM1/NME2/APOBEC3D	16
GO:0002479	antigen processing and presentation of exogenous peptide antigen via MHC class I, TAP-dependent	7/1281	26/18493	0.00153804	0.0252545	0.022167	CALR/PDIA3/B2M/HLA-B/HLA-A/TAP1/HLA-C	7
GO:0034629	cellular protein-containing complex localization	7/1281	26/18493	0.00153804	0.0252545	0.022167	RAN/EXOC3L2/MIOS/HASPIN/SEC13/SNAPIN/RCC2	7
GO:0060349	bone morphogenesis	17/1281	111/18493	0.00160932	0.0263454	0.0231245	SERPINH1/MMP14/ANXA2/ANXA2P2/COL6A2/COL6A1/SHOX2/COL1A1/POR/POC1A/CHSY1/RIPPLY2/LTF/SFRP4/THBS3/ZMPSTE24/CARM1	17
GO:0071349	cellular response to interleukin-12	10/1281	49/18493	0.00167862	0.0273974	0.0240478	P4HB/MSN/ANXA2/RAP1B/CAPZA1/PPIA/HNRNPF/CDC42/LMNB1/SOD2	10
GO:0002504	antigen processing and presentation of peptide or polysaccharide antigen via MHC class II	16/1281	102/18493	0.0016898	0.0274971	0.0241354	CAPZA1/IFI30/SEC24D/KIF18A/KIF4A/KIF2C/KIF23/CTSL/SH3GL2/CAPZA2/RACGAP1/CENPE/SEC13/FCER1G/HLA-DRA/FCGR2B	16
GO:0006333	chromatin assembly or disassembly	25/1281	192/18493	0.0017144	0.0278143	0.0244137	HAT1/ASF1B/MCM2/CENPL/CENPA/IPO4/GRWD1/RUVBL1/CENPU/HMGB2/CENPN/OIP5/CENPK/ITGB3BP/CENPH/HIST1H2BH/HJURP/SMARCE1/CENPM/HMGA2/H2AFX/MIS18A/H2AFY/CENPW/HIST1H2BK	25
GO:0010812	negative regulation of cell-substrate adhesion	12/1281	66/18493	0.00173727	0.0281014	0.0246657	MMP14/ACTN4/LGALS1/JAG1/COL1A1/ANGPT2/GBP1/SERPINE1/POSTN/RHOA/HOXA7/RCC2	12
GO:0008625	extrinsic apoptotic signaling pathway via death domain receptors	14/1281	84/18493	0.00178918	0.0288551	0.0253273	RIPK1/FADD/BAX/CASP8/TNFRSF1A/BRCA1/HMGB2/LGALS3/SP100/DDX47/SERPINE1/TRADD/HMOX1/CFLAR	14
GO:0006913	nucleocytoplasmic transport	40/1281	357/18493	0.00181362	0.0291538	0.0255895	CALR/NUP37/HDAC3/KPNA2/NUP205/CPSF4/SRSF9/FLNA/NXT1/BCL3/NUP54/MAGOH/SEC61B/IPO4/HYAL2/NUP85/STAT3/LMNA/DDX39A/SMO/GEMIN6/RAN/EIF4A3/SNRPB/ECT2/SP100/NUP62/POLR2D/SNRPD2/GTSE1/GEMIN7/FBXO22/POM121C/PDE2A/ALYREF/ENY2/CDK1/SLBP/RAE1/HEATR3	40
GO:0016553	base conversion or substitution editing	6/1281	20/18493	0.00181843	0.0291538	0.0255895	APOBEC3C/APOBEC3B/APOBEC3F/APOBEC3G/ADARB2/APOBEC3D	6
GO:0001649	osteoblast differentiation	27/1281	214/18493	0.00183083	0.0292663	0.0256883	PSMC2/CLIC1/FAM20C/TPM4/MRC2/FZD1/ATRAID/TWSG1/COL6A1/SHOX2/JAG1/COL1A1/SMO/TNC/PDLIM7/HDAC7/CLEC5A/ILK/ALYREF/LTF/SH3PXD2B/HOXA2/FBXO5/CTHRC1/EPHA2/IGFBP5/SPP1	27
GO:0001503	ossification	42/1281	380/18493	0.00183633	0.0292681	0.0256899	PSMC2/CLIC1/FAM20C/MMP14/TPM4/MRC2/EXT2/BMP1/FZD1/ATRAID/MMP2/TWSG1/COL5A2/SBNO2/SLC26A2/COL6A1/SHOX2/JAG1/COL1A1/SMO/HOXA3/TNC/MMP9/PDLIM7/HDAC7/CLEC5A/ILK/CHSY1/RIPPLY2/RHOA/ANO6/PTN/ALYREF/LTF/SH3PXD2B/HOXA2/FBXO5/ZMPSTE24/CTHRC1/EPHA2/IGFBP5/SPP1	42
GO:1902041	regulation of extrinsic apoptotic signaling pathway via death domain receptors	11/1281	58/18493	0.00187675	0.029825	0.0261787	RIPK1/FADD/CASP8/BRCA1/HMGB2/LGALS3/SP100/SERPINE1/TRADD/HMOX1/CFLAR	11
GO:0034504	protein localization to nucleus	32/1281	269/18493	0.00194851	0.0308751	0.0271004	CALR/HDAC3/KPNA2/FLNA/NXT1/BCL3/NUP54/LIF/SEC61B/IPO4/HYAL2/PARP9/COL1A1/NUP85/STAT3/LMNA/DTX3L/SMO/RAN/ARL2BP/PLK1/ECT2/SP100/NUP62/FBXO4/DKC1/TOR1A/GTSE1/POM121C/PDE2A/CDK1/HEATR3	32
GO:0001913	T cell mediated cytotoxicity	10/1281	50/18493	0.00197028	0.0309494	0.0271656	FADD/NECTIN2/B2M/HLA-B/HLA-A/RAB27A/CTSC/HLA-C/HFE/FCGR2B	10
GO:0070671	response to interleukin-12	10/1281	50/18493	0.00197028	0.0309494	0.0271656	P4HB/MSN/ANXA2/RAP1B/CAPZA1/PPIA/HNRNPF/CDC42/LMNB1/SOD2	10
GO:1900024	regulation of substrate adhesion-dependent cell spreading	10/1281	50/18493	0.00197028	0.0309494	0.0271656	CALR/PDPN/FLNA/ACTN4/NRP1/ARPC2/CDC42/GBP1/POSTN/RCC2	10
GO:0071230	cellular response to amino acid stimulus	12/1281	67/18493	0.00198552	0.0310989	0.0272968	COL4A1/MMP2/COL1A2/XBP1/COL5A2/COL6A1/CPEB3/COL3A1/COL1A1/SOCS1/DNMT3A/LAMTOR2	12
GO:0052548	regulation of endopeptidase activity	45/1281	417/18493	0.00207313	0.0323362	0.0283828	SERPINH1/RIPK1/DAP/CASP3/FADD/TIMP1/CASP4/BCL2L12/BAX/CASP8/BAK1/BCL10/MUL1/PLAUR/SERPINB8/TRIAP1/PTTG1/STAT3/CAST/VEGFA/MMP9/TNFAIP8/POR/PSMB8/CSTB/SERPING1/PSMB9/BIRC5/SERPINE1/RHOA/TRADD/GAPDH/SERPINA1/LTF/CARD16/SERPINA5/SERPINA3/PROS1/CFLAR/CASP1/BCAP31/SERPINB6/CD44/LXN/GRIN1	45
GO:0006664	glycolipid metabolic process	16/1281	104/18493	0.00207642	0.0323362	0.0283828	GLA/GLB1/PIGT/HEXB/GAL3ST4/CTSA/BAX/NAGA/HEXA/SUMF1/PIGC/SUMF2/B3GNT5/DPM1/ST8SIA4/NEU1	16
GO:0051169	nuclear transport	40/1281	360/18493	0.00211335	0.0328173	0.0288051	CALR/NUP37/HDAC3/KPNA2/NUP205/CPSF4/SRSF9/FLNA/NXT1/BCL3/NUP54/MAGOH/SEC61B/IPO4/HYAL2/NUP85/STAT3/LMNA/DDX39A/SMO/GEMIN6/RAN/EIF4A3/SNRPB/ECT2/SP100/NUP62/POLR2D/SNRPD2/GTSE1/GEMIN7/FBXO22/POM121C/PDE2A/ALYREF/ENY2/CDK1/SLBP/RAE1/HEATR3	40
GO:0006687	glycosphingolipid metabolic process	11/1281	59/18493	0.00216519	0.0335265	0.0294276	GLA/GLB1/HEXB/CTSA/BAX/NAGA/HEXA/SUMF1/SUMF2/ST8SIA4/NEU1	11
GO:0051321	meiotic cell cycle	30/1281	249/18493	0.00218176	0.0336848	0.0295666	CALR/CDK2/SMC4/RBBP8/HUS1/ACTR3/AURKA/KIF18A/LIF/SGO2/P3H4/CDC20/PTTG1/PLK1/BUB1/TRIP13/RAD51/RAD54B/CKS2/NUF2/EXO1/NCAPH/RAD54L/RPA1/H2AFX/SGO1/MLH1/FBXO5/FANCD2/CDC25C	30
GO:0006310	DNA recombination	33/1281	282/18493	0.00218781	0.0336848	0.0295666	APEX2/GINS4/KPNA2/ACTL6A/RBBP8/HUS1/RPA3/PPP4C/PARPBP/CHEK1/CLCF1/RUVBL1/GINS2/BRCA1/SEM1/HMGB2/RFWD3/TRIP13/RAD51AP1/RAD51/RECQL/RAD54B/UNG/EXO1/RAD54L/ALYREF/RPA1/H2AFX/MLH1/MCM8/AP5Z1/CDC45/SWAP70	33
GO:0052547	regulation of peptidase activity	47/1281	442/18493	0.00224841	0.0345201	0.0302997	SERPINH1/RIPK1/DAP/CASP3/FADD/TIMP1/PCOLCE/CASP4/FN1/BCL2L12/BAX/CASP8/BAK1/BCL10/MUL1/PLAUR/SERPINB8/TRIAP1/PTTG1/STAT3/CAST/VEGFA/MMP9/TNFAIP8/POR/PSMB8/CSTB/SERPING1/PSMB9/BIRC5/SERPINE1/RHOA/TRADD/GAPDH/SERPINA1/LTF/CARD16/SERPINA5/SERPINA3/PROS1/CFLAR/CASP1/BCAP31/SERPINB6/CD44/LXN/GRIN1	47
GO:1905898	positive regulation of response to endoplasmic reticulum stress	8/1281	35/18493	0.00226401	0.0346617	0.030424	EDEM2/BAX/BAK1/XBP1/PTPN2/PTPN1/BCAP31/FCGR2B	8
GO:0030193	regulation of blood coagulation	13/1281	77/18493	0.00228342	0.034666	0.0304278	ANXA5/ANXA2/ANXA2P2/VKORC1/PDPN/PLAU/PLAT/PLAUR/SERPING1/SERPINE1/ANO6/PROS1/FCER1G	13
GO:1900046	regulation of hemostasis	13/1281	77/18493	0.00228342	0.034666	0.0304278	ANXA5/ANXA2/ANXA2P2/VKORC1/PDPN/PLAU/PLAT/PLAUR/SERPING1/SERPINE1/ANO6/PROS1/FCER1G	13
GO:1903901	negative regulation of viral life cycle	13/1281	77/18493	0.00228342	0.034666	0.0304278	PLSCR1/PTX3/APOBEC3C/FAM111A/TRIM5/TRIM21/APOBEC3F/APOBEC3G/ISG20/ZC3HAV1/HMGA2/LTF/APOBEC3D	13
GO:1903509	liposaccharide metabolic process	16/1281	105/18493	0.00229582	0.034757	0.0305077	GLA/GLB1/PIGT/HEXB/GAL3ST4/CTSA/BAX/NAGA/HEXA/SUMF1/PIGC/SUMF2/B3GNT5/DPM1/ST8SIA4/NEU1	16
GO:0003416	endochondral bone growth	9/1281	43/18493	0.00235406	0.0355397	0.0311947	ANXA2/ANXA2P2/COL6A2/COL6A1/POR/POC1A/THBS3/ZMPSTE24/CARM1	9
GO:0006282	regulation of DNA repair	17/1281	115/18493	0.00237374	0.0357377	0.0313684	CYREN/PCNA/PPP4C/PARPBP/CHEK1/PARP9/TIMELESS/DTX3L/BRCA1/RAD51AP1/RAD51/TIGAR/FOXM1/USP1/HMGA2/H2AFX/TMEM161A	17
GO:0019883	antigen processing and presentation of endogenous antigen	6/1281	21/18493	0.00239818	0.0358286	0.0314483	B2M/HLA-B/HLA-A/TAP1/HLA-C/HFE	6
GO:0071711	basement membrane organization	6/1281	21/18493	0.00239818	0.0358286	0.0314483	PLOD3/COL4A1/ITGB1/MMP11/NID2/NID1	6
GO:0007015	actin filament organization	43/1281	397/18493	0.00239956	0.0358286	0.0314483	ZYX/PFN1/TPM4/VASP/HSP90B1/ACTR3/CAPZA1/FLNA/NOX4/ACTN4/ARPC1A/MYO1C/RHOC/WDR1/ARPC5/CTNNA1/NRP1/ARF6/ARHGAP18/ARPC2/ANG/CAPG/RHOJ/DIAPH1/CDC42/TMSB10/TWF2/IQGAP2/CAPZA2/ARPC1B/ACTN1/PXN/RAC2/TPM3/RHOA/PLS3/SH3PXD2B/GPR65/TGFBR1/SWAP70/EPS8/CAP1/PLEKHG2	43
GO:2001243	negative regulation of intrinsic apoptotic signaling pathway	15/1281	96/18493	0.0024175	0.0359975	0.0315965	BCL2L12/XBP1/TXNDC12/PLAUR/TRIAP1/YBX3/HDAC1/DDIAS/MMP9/HSPB1/PTPN1/TMEM161A/SOD2/SELENOS/CD44	15
GO:0071480	cellular response to gamma radiation	7/1281	28/18493	0.00245128	0.0364009	0.0319506	HSPA5/NOX4/CHEK2/TMEM109/MAP3K20/H2AFX/ZMPSTE24	7
GO:0030166	proteoglycan biosynthetic process	11/1281	60/18493	0.00248856	0.0368538	0.0323481	CHST14/CHPF2/CANT1/EXT2/GAL3ST4/BGN/CHST12/CHPF/HS2ST1/CHSY1/SLC35D1	11
GO:0018158	protein oxidation	5/1281	15/18493	0.00264206	0.038915	0.0341573	LOX/LOXL3/LOXL2/SUMF1/LOXL1	5
GO:0048569	post-embryonic animal organ development	5/1281	15/18493	0.00264206	0.038915	0.0341573	BAX/BAK1/LDHA/VEGFA/FZD5	5
GO:0007566	embryo implantation	10/1281	52/18493	0.00267588	0.039246	0.0344479	CALR/SYDE1/TIMP1/MMP2/LIF/VMP1/IGFBP7/MMP9/ARHGDIB/SPP1	10
GO:0051701	interaction with host	26/1281	209/18493	0.00267898	0.039246	0.0344479	P4HB/ITGB1/KPNA2/ITGA5/CPSF4/NECTIN2/CASP8/PTX3/TYMS/SLC52A2/PPIA/LGALS1/HYAL2/TRIM5/FUCA2/TRIM21/F11R/CTSB/ITGB3/CLEC5A/CXCR4/GAPDH/ALYREF/CDK1/EPHA2/TNFRSF14	26
GO:0051495	positive regulation of cytoskeleton organization	27/1281	220/18493	0.00272339	0.0397737	0.0349111	PFN1/VASP/ACTR3/FLNA/NOX4/ARPC1A/MYO1C/RHOC/WDR1/ARPC5/NRP1/ARF6/ARPC2/NUP62/POC1A/CDC42/PSRC1/IQGAP2/ARPC1B/PXN/RHOA/SLAIN2/ANKRD53/SH3PXD2B/GPR65/TGFBR1/SWAP70	27
GO:0046131	pyrimidine ribonucleoside metabolic process	8/1281	36/18493	0.00273696	0.0397737	0.0349111	APOBEC3C/UMPS/UPP1/APOBEC3B/APOBEC3F/APOBEC3G/NME2/APOBEC3D	8
GO:0060236	regulation of mitotic spindle organization	8/1281	36/18493	0.00273696	0.0397737	0.0349111	TACC3/BORA/PLK1/NUP62/PSRC1/TPX2/ANKRD53/RAE1	8
GO:0006403	RNA localization	28/1281	231/18493	0.00275388	0.0399128	0.0350332	NUP37/NUP205/SHQ1/CPSF4/SRSF9/NXT1/NUP54/MAGOH/MYO1C/IGF2BP3/NUP85/RUVBL1/DDX39A/NOP10/RAN/EIF5AL1/EIF4A3/NUP62/MEX3D/POLR2D/DKC1/IGF2BP2/POM121C/ALYREF/SEC13/ENY2/SLBP/RAE1	28
GO:0000723	telomere maintenance	21/1281	157/18493	0.00278703	0.0402859	0.0353606	RFC2/PCNA/HUS1/POLD3/RPA3/DCLRE1B/POLA2/NOP10/SMARCAL1/POLD1/PRIM2/RAD51/SP100/FBXO4/DKC1/POLD2/POT1/RFC4/EXO1/RPA1/AURKB	21
GO:1901264	carbohydrate derivative transport	12/1281	70/18493	0.00290958	0.0419458	0.0368176	SLC35A2/SLC35A4/G6PC3/SLC35C1/SLC35B1/NPC2/SLC25A24/RFT1/ABCD1/SLC25A19/SLC35D1/SLC35D2	12
GO:0071897	DNA biosynthetic process	24/1281	189/18493	0.00292572	0.0420267	0.0368886	RFC2/PCNA/POLD3/RPA3/NOX4/TYMS/PPIA/TK1/POLA2/NOP10/PRKD2/DNAJC2/POLD1/POLE2/PCLAF/FBXO4/DKC1/DSCC1/POLD2/POT1/RFC4/RPA1/UBC/AURKB	24
GO:2000116	regulation of cysteine-type endopeptidase activity	28/1281	232/18493	0.00293065	0.0420267	0.0368886	RIPK1/DAP/CASP3/FADD/CASP4/BCL2L12/BAX/CASP8/BAK1/BCL10/MUL1/PLAUR/TRIAP1/CAST/VEGFA/MMP9/TNFAIP8/POR/PSMB9/RHOA/TRADD/LTF/CARD16/CFLAR/CASP1/BCAP31/CD44/GRIN1	28
GO:0061640	cytoskeleton-dependent cytokinesis	15/1281	98/18493	0.00296739	0.0424415	0.0372527	ACTR3/CEP55/KIF4A/RHOC/CENPA/KIF23/KIF20A/PLK1/ECT2/NUP62/NUSAP1/RACGAP1/RHOA/ANKRD53/AURKB	15
GO:0071900	regulation of protein serine/threonine kinase activity	51/1281	496/18493	0.00302611	0.0431678	0.0378901	RIPK1/CASP3/SHC1/MAP2K3/CCNB1/CKS1B/ACTB/SPRY1/MUL1/IQGAP1/NOX4/ADAM9/GDF15/HYAL2/CCNA2/VEGFA/CDKN2C/STK38/CDC6/CDKN3/CCNYL1/PLK1/FZD5/NUP62/HSPB1/LATS2/CCNB2/DBF4/PSRC1/CKS2/SPRY2/PTPN22/ILK/MAPKAPK2/PTPN1/CXCR4/RHOA/LTF/MAP3K20/DIRAS3/LAMTOR2/H2AFY/TGFBR1/EZH2/CDK1/DUSP6/IQGAP3/AJUBA/UBC/CDC25C/GADD45A	51
GO:0045071	negative regulation of viral genome replication	10/1281	53/18493	0.00309746	0.0440699	0.038682	PLSCR1/APOBEC3C/FAM111A/APOBEC3F/APOBEC3G/ISG20/ZC3HAV1/HMGA2/LTF/APOBEC3D	10
GO:0007064	mitotic sister chromatid cohesion	6/1281	22/18493	0.00310659	0.0440844	0.0386947	CDC20/DSCC1/BOD1/HASPIN/SGO1/H2AFY	6
GO:0001704	formation of primary germ layer	17/1281	118/18493	0.00312815	0.0442747	0.0388617	MMP14/EXT2/COL4A2/ITGB1/ITGA5/MMP2/FN1/TWSG1/COL5A2/COL6A1/MMP9/COL5A1/ITGB3/ITGA4/LAMB1/HMGA2/EPHA2	17
GO:0010256	endomembrane system organization	43/1281	403/18493	0.00316938	0.0447418	0.0392718	TMED9/SEC61A1/LMAN2/SURF4/PI4K2B/TOR1B/REEP4/TMED2/PLSCR3/CCNB1/PLSCR1/NECTIN2/TMED4/PHETA2/TMEM43/NEK6/VMP1/LMNA/RINT1/EHD2/RAB27A/PLK1/SH3GLB1/TMED10/COL5A1/LMAN2L/CDC42/SH3GL2/CCNB2/VPS25/LMAN1/ABCD1/TOR1A/PLK3/CXCR4/TRAM2/ANO6/TMED5/STX2/CDK1/ZMPSTE24/MYOF/TMED3	43
GO:0043297	apical junction assembly	11/1281	62/18493	0.00325225	0.0457927	0.0401942	ACTN4/MYO1C/RHOC/WDR1/CTNNA1/F11R/FZD5/RUNX1/ECT2/RHOA/EPHA2	11
GO:0098868	bone growth	9/1281	45/18493	0.00326625	0.0458709	0.0402628	ANXA2/ANXA2P2/COL6A2/COL6A1/POR/POC1A/THBS3/ZMPSTE24/CARM1	9
GO:0050856	regulation of T cell receptor signaling pathway	8/1281	37/18493	0.00328358	0.0459955	0.0403722	NECTIN2/BCL10/PTPN2/PRKD2/LGALS3/PTPN22/BTN2A2/GBP1	8
GO:0061025	membrane fusion	20/1281	149/18493	0.00332865	0.0465069	0.0408211	CALR/ANXA2/RAB8A/ANXA2P2/RCC1L/NECTIN2/ANXA1/GNAI3/YKT6/PPIA/HYAL2/RAB34/TAP1/CXCR4/STX2/SERPINA5/SAMD9/SNAPIN/VAV3/SAMD9L	20
GO:0007098	centrosome cycle	17/1281	119/18493	0.00341994	0.0468407	0.0411141	CDK2/AURKA/HAUS1/CHEK1/STIL/HAUS8/BRCA1/PLK1/NUP62/PCLAF/POC1A/ODF2/ATF5/SGO1/CDK1/NUBP1/GADD45A	17
GO:0009116	nucleoside metabolic process	17/1281	119/18493	0.00341994	0.0468407	0.0411141	DPYD/GNAI3/APOBEC3C/UMPS/TK1/UPP1/RAN/AHCY/GMPS/PNP/APOBEC3B/APOBEC3F/TYMP/APOBEC3G/RHOA/NME2/APOBEC3D	17
GO:0071426	ribonucleoprotein complex export from nucleus	18/1281	129/18493	0.00342149	0.0468407	0.0411141	NUP37/NUP205/CPSF4/SRSF9/NXT1/NUP54/MAGOH/NUP85/DDX39A/RAN/EIF4A3/NUP62/POLR2D/POM121C/ALYREF/ENY2/SLBP/RAE1	18
GO:0016139	glycoside catabolic process	4/1281	10/18493	0.0034301	0.0468407	0.0411141	GUSB/GLA/NAGA/FUCA2	4
GO:0036500	ATF6-mediated unfolded protein response	4/1281	10/18493	0.0034301	0.0468407	0.0411141	CALR/HSPA5/HSP90B1/XBP1	4
GO:0044359	modulation of molecular function in other organism	4/1281	10/18493	0.0034301	0.0468407	0.0411141	ANXA2/ANXA2P2/CASP8/PTX3	4
GO:0051256	mitotic spindle midzone assembly	4/1281	10/18493	0.0034301	0.0468407	0.0411141	KIF4A/KIF23/RACGAP1/AURKB	4
GO:0052205	modulation of molecular function in other organism involved in symbiotic interaction	4/1281	10/18493	0.0034301	0.0468407	0.0411141	ANXA2/ANXA2P2/CASP8/PTX3	4
GO:2000644	regulation of receptor catabolic process	4/1281	10/18493	0.0034301	0.0468407	0.0411141	ANXA2/ANXA2P2/DTX3L/PTPN1	4
GO:0060562	epithelial tube morphogenesis	35/1281	313/18493	0.00348927	0.0475292	0.0417184	MMP14/PFN1/COL4A1/VASP/FZD1/TMED2/BCL10/SPRY1/RDH10/TEAD2/PPP1CA/CLIC4/TCTN1/PTK7/ENG/HOXA5/STIL/TIMELESS/NRP1/VEGFA/SMO/TNC/PRKD2/IFT52/NKX2-5/SPRY2/ILK/CXCL10/FZD2/RHOA/HOXD11/HOXB7/CTHRC1/EPHA2/CTSZ	35
GO:0070206	protein trimerization	10/1281	54/18493	0.00357027	0.0485111	0.0425802	EMILIN1/COL1A2/NUP54/COL6A2/COL6A1/COL1A1/C1QTNF6/TRIM21/NUP62/TRPM8	10
GO:0006206	pyrimidine nucleobase metabolic process	5/1281	16/18493	0.00362594	0.0489007	0.0429222	DPYD/TYMS/UMPS/TYMP/RRM1	5
GO:0030397	membrane disassembly	5/1281	16/18493	0.00362594	0.0489007	0.0429222	CCNB1/NEK6/PLK1/CCNB2/CDK1	5
GO:0051081	nuclear envelope disassembly	5/1281	16/18493	0.00362594	0.0489007	0.0429222	CCNB1/NEK6/PLK1/CCNB2/CDK1	5
GO:0140013	meiotic nuclear division	22/1281	171/18493	0.00364172	0.048992	0.0430023	CALR/SMC4/ACTR3/AURKA/KIF18A/LIF/SGO2/P3H4/CDC20/PTTG1/PLK1/BUB1/TRIP13/RAD51/RAD54B/CKS2/NUF2/NCAPH/SGO1/MLH1/FBXO5/FANCD2	22
GO:0016050	vesicle organization	35/1281	314/18493	0.00367319	0.0492933	0.0432668	CALR/TMED9/ANXA2/RAB8A/PI4K2B/ANXA2P2/TMED2/SEC24D/NECTIN2/ANXA1/PHETA2/GNAI3/SDC1/RAB32/BET1/RAB34/RAB27A/TMED10/TAP1/CTSC/VPS25/SDCBP/LMAN1/TFG/DNM3/SERPINA1/SEC13/STX2/SAMD9/BLOC1S5/SNAPIN/FBXO5/VAV3/SAMD9L/CTSZ	35
GO:0007265	Ras protein signal transduction	45/1281	430/18493	0.0037182	0.0496888	0.043614	CDK2/RAB8A/SHC1/ITGB1/RAP1B/PDPN/RAP2B/ARAP3/COL1A2/IFT22/SPRY1/RHOC/RIT1/RAB32/COL3A1/CCNA2/MCF2L2/NRP1/KSR2/RAB34/ARF6/NRAS/RAB27A/ECT2/DOK1/NUP62/RHOJ/TAX1BP3/CDC42/CTNNAL1/SPRY2/FOXM1/RAC2/MCF2/RHOA/ARHGDIB/GPR65/KIF14/G3BP1/IQGAP3/DOK3/RASSF1/VAV3/EPS8/PLEKHG2	45
GO:0071166	ribonucleoprotein complex localization	18/1281	130/18493	0.00372095	0.0496888	0.043614	NUP37/NUP205/CPSF4/SRSF9/NXT1/NUP54/MAGOH/NUP85/DDX39A/RAN/EIF4A3/NUP62/POLR2D/POM121C/ALYREF/ENY2/SLBP/RAE1	18
GO:0007173	epidermal growth factor receptor signaling pathway	17/1281	120/18493	0.00373387	0.0497392	0.0436582	PTPN12/SHC1/ARF4/SPRY1/IQGAP1/PLAUR/PTPN2/REPS2/MMP9/DOK1/NUP62/CDC42/SH3GL2/VPS25/SPRY2/SHKBP1/EPS8	17

## Sheet: CC terms
Sheet 2. 110 terms of cellular component (CC)
ID	Description	GeneRatio	BgRatio	pvalue	p.adjust	qvalue	geneID	Count
GO:0005925	focal adhesion	82/1339	402/19659	1.39024e-19	7.40316e-17	5.87421e-17	P4HB/CALR/ZYX/HSPA5/PPIB/MMP14/PFN1/PTPN12/TPM4/CD151/ANXA5/MRC2/MSN/ITGB1/VASP/GNB2/ITGA5/FZD1/HSP90B1/ACTR3/NCSTN/PLAU/REXO2/LAP3/FLNA/PDIA3/NECTIN2/VIM/SLC4A2/ANXA1/ACTB/ADGRE5/TSPAN4/IQGAP1/NOX4/HSPG2/TGFB1I1/B2M/PLAUR/ACTN4/CNN3/ADAM9/PPIA/ARPC5/TRIP6/PTK7/ENG/CTNNA1/NRP1/KIF23/TNC/FLII/ARF6/FHL3/ARPC2/PALLD/FBLIM1/PDLIM7/PDLIM1/HSPB1/ITGB3/CDC42/ACTG1/TES/CAPN5/MCAM/ITGA4/SDCBP/ARPC1B/ILK/A…	82
GO:0005924	cell-substrate adherens junction	82/1339	405/19659	2.2502e-19	7.40316e-17	5.87421e-17	P4HB/CALR/ZYX/HSPA5/PPIB/MMP14/PFN1/PTPN12/TPM4/CD151/ANXA5/MRC2/MSN/ITGB1/VASP/GNB2/ITGA5/FZD1/HSP90B1/ACTR3/NCSTN/PLAU/REXO2/LAP3/FLNA/PDIA3/NECTIN2/VIM/SLC4A2/ANXA1/ACTB/ADGRE5/TSPAN4/IQGAP1/NOX4/HSPG2/TGFB1I1/B2M/PLAUR/ACTN4/CNN3/ADAM9/PPIA/ARPC5/TRIP6/PTK7/ENG/CTNNA1/NRP1/KIF23/TNC/FLII/ARF6/FHL3/ARPC2/PALLD/FBLIM1/PDLIM7/PDLIM1/HSPB1/ITGB3/CDC42/ACTG1/TES/CAPN5/MCAM/ITGA4/SDCBP/ARPC1B/ILK/A…	82
GO:0030055	cell-substrate junction	82/1339	409/19659	4.23894e-19	9.2974e-17	7.37724e-17	P4HB/CALR/ZYX/HSPA5/PPIB/MMP14/PFN1/PTPN12/TPM4/CD151/ANXA5/MRC2/MSN/ITGB1/VASP/GNB2/ITGA5/FZD1/HSP90B1/ACTR3/NCSTN/PLAU/REXO2/LAP3/FLNA/PDIA3/NECTIN2/VIM/SLC4A2/ANXA1/ACTB/ADGRE5/TSPAN4/IQGAP1/NOX4/HSPG2/TGFB1I1/B2M/PLAUR/ACTN4/CNN3/ADAM9/PPIA/ARPC5/TRIP6/PTK7/ENG/CTNNA1/NRP1/KIF23/TNC/FLII/ARF6/FHL3/ARPC2/PALLD/FBLIM1/PDLIM7/PDLIM1/HSPB1/ITGB3/CDC42/ACTG1/TES/CAPN5/MCAM/ITGA4/SDCBP/ARPC1B/ILK/A…	82
GO:0005788	endoplasmic reticulum lumen	67/1339	301/19659	2.80263e-18	4.61032e-16	3.65817e-16	CALU/PDIA6/P4HB/CALR/SERPINH1/COLGALT1/TXNDC5/EDEM2/LAMC1/HSPA5/FSTL1/MANF/FAM20C/PPIB/DNAJB11/P3H1/CKAP4/KDELC2/COL4A2/MYDGF/PDIA5/COL4A1/TIMP1/GPX8/TOR1B/TOR3A/GPX7/GANAB/HSP90B1/FKBP10/FN1/SHISA5/PDIA3/COL1A2/ERP44/TXNDC12/NUCB1/COL5A2/COL6A2/TMEM43/B2M/PLAUR/COL6A1/SIL1/LGALS1/SDF2L1/COL3A1/COL1A1/ARSD/FUCA2/TNC/SUMF1/IGFBP7/LAMB2/ADAMTSL4/COL5A1/SUMF2/CTSC/KDELC1/TOR1A/LAMB1/IGFBP4/SERPINA1/…	67
GO:0062023	collagen-containing extracellular matrix	67/1339	332/19659	5.62963e-16	7.40859e-14	5.87852e-14	PLOD3/CALR/SERPINH1/LAMC1/CD151/ANXA5/ANXA2/COL4A2/COL4A1/TIMP1/ANXA2P2/PCOLCE/EMILIN1/MMP2/FN1/COL1A2/BGN/ANXA1/COL5A2/COL6A2/HSPG2/TGFB1I1/COL6A1/LGALS1/LGALS3BP/COL3A1/SERPINB8/EFEMP2/COL1A1/LOXL2/EMILIN2/TNC/IGFBP7/ELN/LOXL1/MMP9/LAMB2/FMOD/LGALS3/ANG/ADAMTSL4/CTSB/COL5A1/CSTB/S100A6/TGFBI/CTSC/SERPING1/LMAN1/LAMA4/SERPINE1/LAMB1/POSTN/SERPINA1/MXRA5/PTN/IL7/LUM/SERPINA3/NID2/CTHRC1/RBP3/NID1…	67
GO:0098687	chromosomal region	66/1339	346/19659	1.64329e-14	1.80214e-12	1.42995e-12	NUP37/CDK2/PCNA/HAT1/MCM3/AURKA/MCM2/CENPL/CCNB1/MCM5/KIF18A/MCM6/CHEK2/PPP1CA/SGO2/CDCA8/CHEK1/DCLRE1B/CENPA/DSN1/NUP85/ERCC6L/KIF2C/CENPU/LRWD1/ORC5/CENPN/SKA1/PLK1/CBX3/BUB1/POLD1/OIP5/RAD51/CENPK/ORC1/SP100/ITGB3BP/CENPH/NDC80/ZNF207/ZWILCH/HJURP/DSCC1/POT1/BOD1/BIRC5/NUF2/CENPM/DNMT3A/CENPE/ALYREF/NCAPG/RPA1/SEC13/H2AFX/SGO1/MIS18A/H2AFY/CDK1/PPP1CB/RCC2/CENPW/SKA3/AURKB/MAD2L1	66
GO:0000793	condensed chromosome	49/1339	221/19659	1.17993e-13	1.10914e-11	8.80071e-12	NUP37/CDK2/SMC4/HUS1/AURKA/CCNB1/NCAPG2/SGO2/CHEK1/CENPA/P3H4/DSN1/NUP85/ERCC6L/KIF2C/UBE2I/BRCA1/CENPU/HMGB2/LRWD1/CENPN/SKA1/PLK1/CBX3/BUB1/RAD51/CENPK/ITGB3BP/CENPH/NDC80/ZNF207/ZWILCH/HJURP/BOD1/BIRC5/NUF2/CENPM/CENPE/NCAPH/NCAPG/H2AFX/SGO1/MLH1/H2AFY/FANCD2/CENPW/SKA3/AURKB/MAD2L1	49
GO:0000779	condensed chromosome, centromeric region	34/1339	117/19659	1.9282e-13	1.46337e-11	1.16114e-11	NUP37/AURKA/CCNB1/SGO2/CENPA/DSN1/NUP85/ERCC6L/KIF2C/CENPU/LRWD1/CENPN/SKA1/PLK1/CBX3/BUB1/CENPK/ITGB3BP/CENPH/NDC80/ZNF207/ZWILCH/HJURP/BOD1/BIRC5/NUF2/CENPM/CENPE/NCAPG/SGO1/CENPW/SKA3/AURKB/MAD2L1	34
GO:0031012	extracellular matrix	80/1339	490/19659	2.00157e-13	1.46337e-11	1.16114e-11	PLOD3/CALR/SERPINH1/LAMC1/MMP14/CD151/ANXA5/ANXA2/COL4A2/COL4A1/TIMP1/ANXA2P2/PCOLCE/HSP90B1/EMILIN1/MMP2/FN1/CD248/PLSCR1/COL1A2/BGN/ANXA1/PTX3/COL5A2/LOX/COL6A2/HSPG2/TGFB1I1/COL6A1/LGALS1/LGALS3BP/COL3A1/SERPINB8/EFEMP2/CHI3L1/MMP11/COL1A1/LOXL2/VEGFA/EMILIN2/TNC/IGFBP7/ELN/LOXL1/MMP9/LAMB2/FMOD/LGALS3/ANG/OLFML2A/ADAMTSL4/CTSB/COL5A1/CSTB/S100A6/TGFBI/CTSC/SERPING1/LMAN1/TNFRSF11B/LAMA4/SERPI…	80
GO:0000775	chromosome, centromeric region	44/1339	194/19659	9.20544e-13	5.65358e-11	4.48596e-11	NUP37/AURKA/CENPL/CCNB1/KIF18A/SGO2/CDCA8/CENPA/DSN1/NUP85/ERCC6L/KIF2C/CENPU/LRWD1/CENPN/SKA1/PLK1/CBX3/BUB1/OIP5/CENPK/ITGB3BP/CENPH/NDC80/ZNF207/ZWILCH/HJURP/DSCC1/BOD1/BIRC5/NUF2/CENPM/DNMT3A/CENPE/NCAPG/SEC13/SGO1/MIS18A/H2AFY/RCC2/CENPW/SKA3/AURKB/MAD2L1	44
GO:0005793	endoplasmic reticulum-Golgi intermediate compartment	34/1339	123/19659	9.45127e-13	5.65358e-11	4.48596e-11	PDIA6/P4HB/CALR/SERPINH1/TMED9/HSPA5/LMAN2/KDELR1/SURF4/MYDGF/ERGIC1/ERGIC3/TMED2/FN1/ERP44/TMED4/NUCB1/COPB1/CNIH4/YKT6/BET1/PTPN2/VMP1/TMED10/RER1/TAP1/LMAN2L/CTSC/LMAN1/SERPINA1/TMED5/BCAP31/TMED3/CTSZ	34
GO:0000777	condensed chromosome kinetochore	30/1339	104/19659	6.19643e-12	3.39771e-10	2.69599e-10	NUP37/CCNB1/SGO2/CENPA/DSN1/NUP85/ERCC6L/KIF2C/CENPU/LRWD1/CENPN/SKA1/PLK1/BUB1/CENPK/ITGB3BP/CENPH/NDC80/ZNF207/ZWILCH/HJURP/BOD1/BIRC5/NUF2/CENPM/CENPE/SGO1/CENPW/SKA3/MAD2L1	30
GO:0060205	cytoplasmic vesicle lumen	59/1339	338/19659	1.94519e-11	9.66334e-10	7.6676e-10	CALR/GUSB/TXNDC5/PSMC2/GLA/CANT1/GLB1/HEXB/PRDX4/ANXA2/PYGL/GALNS/PGM2/TIMP1/GRN/S100A11/HSP90B1/PSMA2/CTSA/GNS/FN1/ERP44/PTX3/MAN2B1/GGH/B2M/ACTN4/IDH1/PPIA/ARPC5/LGALS3BP/CHI3L1/DSN1/VEGFA/FUCA2/RAB27A/HEBP2/NPC2/CSTB/TUBB/PNP/PSMA5/CTSC/SERPING1/COTL1/SDCBP/GSDMD/SERPINE1/NFKB1/ACTN1/VAT1/SERPINA1/LTF/SERPINA3/NEU1/PROS1/NME2/CAP1/CTSZ	59
GO:0034774	secretory granule lumen	57/1339	321/19659	2.12054e-11	9.66334e-10	7.6676e-10	GUSB/TXNDC5/PSMC2/GLA/CANT1/GLB1/HEXB/PRDX4/ANXA2/PYGL/GALNS/PGM2/TIMP1/GRN/S100A11/PSMA2/CTSA/GNS/FN1/ERP44/PTX3/MAN2B1/GGH/B2M/ACTN4/IDH1/PPIA/ARPC5/LGALS3BP/CHI3L1/DSN1/VEGFA/FUCA2/RAB27A/HEBP2/NPC2/CSTB/TUBB/PNP/PSMA5/CTSC/SERPING1/COTL1/SDCBP/GSDMD/SERPINE1/NFKB1/ACTN1/VAT1/SERPINA1/LTF/SERPINA3/NEU1/PROS1/NME2/CAP1/CTSZ	57
GO:0031983	vesicle lumen	59/1339	339/19659	2.20289e-11	9.66334e-10	7.6676e-10	CALR/GUSB/TXNDC5/PSMC2/GLA/CANT1/GLB1/HEXB/PRDX4/ANXA2/PYGL/GALNS/PGM2/TIMP1/GRN/S100A11/HSP90B1/PSMA2/CTSA/GNS/FN1/ERP44/PTX3/MAN2B1/GGH/B2M/ACTN4/IDH1/PPIA/ARPC5/LGALS3BP/CHI3L1/DSN1/VEGFA/FUCA2/RAB27A/HEBP2/NPC2/CSTB/TUBB/PNP/PSMA5/CTSC/SERPING1/COTL1/SDCBP/GSDMD/SERPINE1/NFKB1/ACTN1/VAT1/SERPINA1/LTF/SERPINA3/NEU1/PROS1/NME2/CAP1/CTSZ	59
GO:0000776	kinetochore	33/1339	133/19659	5.03657e-11	2.07129e-09	1.64351e-09	NUP37/CCNB1/KIF18A/SGO2/CENPA/DSN1/NUP85/ERCC6L/KIF2C/CENPU/LRWD1/CENPN/SKA1/PLK1/BUB1/CENPK/ITGB3BP/CENPH/NDC80/ZNF207/ZWILCH/HJURP/BOD1/BIRC5/NUF2/CENPM/CENPE/SEC13/SGO1/CENPW/SKA3/AURKB/MAD2L1	33
GO:0042470	melanosome	29/1339	106/19659	5.80483e-11	2.12199e-09	1.68374e-09	CALU/PDIA6/P4HB/HSPA5/PPIB/MMP14/CD63/RPN1/ANXA2/ITGB1/ANXA2P2/GANAB/HSP90B1/NCSTN/PDIA3/GGH/RAB32/RAN/RAB27A/AHCY/TMED10/CAPG/CTSB/ITGB3/ATP6V1G2/SDCBP/ATP1B3/CTNS/SYPL1	29
GO:0048770	pigment granule	29/1339	106/19659	5.80483e-11	2.12199e-09	1.68374e-09	CALU/PDIA6/P4HB/HSPA5/PPIB/MMP14/CD63/RPN1/ANXA2/ITGB1/ANXA2P2/GANAB/HSP90B1/NCSTN/PDIA3/GGH/RAB32/RAN/RAB27A/AHCY/TMED10/CAPG/CTSB/ITGB3/ATP6V1G2/SDCBP/ATP1B3/CTNS/SYPL1	29
GO:0005819	spindle	55/1339	333/19659	7.90723e-10	2.7384e-08	2.17285e-08	HDAC3/AURKA/SHCBP1/CCNB1/HAUS1/KIF18A/NEK6/CDCA8/KIF4A/NEDD1/CDC20/DSN1/NUP85/HAUS8/TACC3/KIF23/CEP89/CDC6/KIF20A/ARL2BP/DLGAP5/TBCCD1/SKA1/PLK1/CBX3/ECT2/CAPG/NUP62/HSPB1/LATS2/DIAPH1/POC1A/CDC42/ODF2/PSRC1/ZNF207/NUSAP1/TPX2/BOD1/BIRC5/PRC1/HASPIN/RACGAP1/CENPE/SGO1/ANKRD53/KIF14/CDK1/FBXO5/RASSF1/RCC2/SKA3/AURKB/RAE1/MAD2L1	55
GO:0005775	vacuolar lumen	36/1339	171/19659	9.64256e-10	3.1724e-08	2.51722e-08	GUSB/TXNDC5/GLA/GLB1/HEXB/ANXA2/GALNS/GRN/CTSA/IFI30/GNS/BGN/MAN2B1/GGH/HSPG2/SDC1/DSN1/HEXA/SGSH/FUCA2/FMOD/HEBP2/NPC2/CTSB/TUBB/CTSL/CTSC/SDCBP/VAT1/LUM/SERPINA3/NEU1/NSG2/GPC1/CAP1/ACP2	36
GO:0030496	midbody	36/1339	172/19659	1.14089e-09	3.57479e-08	2.8365e-08	HSPA5/ANXA2/RAB8A/HSP90B1/AURKA/SHCBP1/LAP3/BCL3/CEP55/GNAI3/IQGAP1/CDCA8/KIF4A/CLIC4/KIF23/RAN/ARF6/KIF20A/ARL2BP/PLK1/SH3GLB1/ECT2/CAPG/NUP62/CDC42/PSRC1/BIRC5/PRC1/RACGAP1/RHOA/CENPE/KIF14/CDK1/MPLKIP/RCC2/AURKB	36
GO:0005766	primary lysosome	33/1339	155/19659	3.54379e-09	1.01383e-07	8.04448e-08	GUSB/TXNDC5/DDOST/GLA/GLB1/CMTM6/CD63/HEXB/CKAP4/ANXA2/SURF4/GALNS/GRN/NCSTN/RAP1B/CTSA/GNS/MAN2B1/GGH/BRI3/MAGT1/TMEM179B/DSN1/HEXA/FUCA2/HEBP2/NPC2/TUBB/CTSC/SDCBP/VAT1/SERPINA3/CAP1	33
GO:0042582	azurophil granule	33/1339	155/19659	3.54379e-09	1.01383e-07	8.04448e-08	GUSB/TXNDC5/DDOST/GLA/GLB1/CMTM6/CD63/HEXB/CKAP4/ANXA2/SURF4/GALNS/GRN/NCSTN/RAP1B/CTSA/GNS/MAN2B1/GGH/BRI3/MAGT1/TMEM179B/DSN1/HEXA/FUCA2/HEBP2/NPC2/TUBB/CTSC/SDCBP/VAT1/SERPINA3/CAP1	33
GO:0043596	nuclear replication fork	16/1339	42/19659	6.0113e-09	1.6481e-07	1.30772e-07	PCNA/GINS4/MCM3/POLD3/RPA3/TIPIN/TIMELESS/POLA2/GINS2/SMARCAL1/POLD1/PRIM2/POLD2/RPA1/WDHD1/CDC45	16
GO:0043202	lysosomal lumen	24/1339	94/19659	1.15828e-08	3.04859e-07	2.41897e-07	GUSB/TXNDC5/GLA/GLB1/HEXB/GALNS/CTSA/IFI30/GNS/BGN/MAN2B1/HSPG2/SDC1/HEXA/SGSH/FMOD/NPC2/CTSB/CTSL/LUM/NEU1/NSG2/GPC1/ACP2	24
GO:0005657	replication fork	20/1339	68/19659	1.4035e-08	3.42037e-07	2.71397e-07	RFC2/PCNA/GINS4/MCM3/POLD3/RPA3/TIPIN/TIMELESS/POLA2/GINS2/SMARCAL1/POLD1/PRIM2/POLD2/RFC4/RPA1/H2AFX/WDHD1/RAD18/CDC45	20
GO:0033116	endoplasmic reticulum-Golgi intermediate compartment membrane	20/1339	68/19659	1.4035e-08	3.42037e-07	2.71397e-07	CALR/TMED9/LMAN2/KDELR1/SURF4/ERGIC1/ERGIC3/TMED2/YKT6/BET1/VMP1/TMED10/TAP1/CTSC/LMAN1/SERPINA1/TMED5/BCAP31/TMED3/CTSZ	20
GO:0101002	ficolin-1-rich granule	34/1339	185/19659	9.89053e-08	2.32428e-06	1.84425e-06	GUSB/PSMC2/CANT1/GLB1/PRDX4/PYGL/PGM2/PSMA2/GNS/COPB1/CD58/TMEM179B/IDH1/PPIA/ARPC5/MMP9/CD93/LGALS3/CTSB/DIAPH1/CSTB/TNFAIP6/PNP/PSMA5/COTL1/GSDMD/RHOA/SERPINA1/TCIRG1/FCER1G/DOK3/SERPINB6/NME2/CTSZ	34
GO:0035578	azurophil granule lumen	22/1339	91/19659	1.34159e-07	3.04402e-06	2.41535e-06	GUSB/TXNDC5/GLA/GLB1/HEXB/ANXA2/GALNS/GRN/CTSA/GNS/MAN2B1/GGH/DSN1/FUCA2/HEBP2/NPC2/TUBB/CTSC/SDCBP/VAT1/SERPINA3/CAP1	22
GO:0005604	basement membrane	22/1339	92/19659	1.65097e-07	3.62114e-06	2.87327e-06	LAMC1/CD151/ANXA2/COL4A2/COL4A1/TIMP1/ANXA2P2/FN1/HSPG2/EFEMP2/LOXL2/TNC/LOXL1/LAMB2/ANG/COL5A1/TGFBI/LAMA4/LAMB1/PTN/NID2/NID1	22
GO:0008250	oligosaccharyltransferase complex	8/1339	12/19659	1.75443e-07	3.72392e-06	2.95483e-06	RPN2/DDOST/OSTC/STT3A/RPN1/MAGT1/OST4/KRTCAP2	8
GO:0030176	integral component of endoplasmic reticulum membrane	29/1339	149/19659	2.41312e-07	4.96198e-06	3.9372e-06	CALR/TBL2/SEC61A1/HSPA5/ALG3/TRAM1/PIGT/DPAGT1/DERL2/HM13/TEX261/ERGIC3/PDIA3/SPPL2A/XBP1/HLA-B/SLC35B1/HLA-A/BFAR/TMCO1/TAP1/HLA-C/ESYT1/AUP1/SELENOS/EMC8/BCAP31/ZMPSTE24/HLA-DRA	29
GO:0044420	extracellular matrix component	15/1339	49/19659	5.05809e-07	1.00855e-05	8.00259e-06	LAMC1/COL4A2/COL4A1/EMILIN1/COL1A2/COL5A2/COL3A1/COL1A1/TNC/ELN/LAMB2/COL5A1/LAMB1/LUM/RBP3	15
GO:0031227	intrinsic component of endoplasmic reticulum membrane	29/1339	157/19659	7.58962e-07	1.46882e-05	1.16547e-05	CALR/TBL2/SEC61A1/HSPA5/ALG3/TRAM1/PIGT/DPAGT1/DERL2/HM13/TEX261/ERGIC3/PDIA3/SPPL2A/XBP1/HLA-B/SLC35B1/HLA-A/BFAR/TMCO1/TAP1/HLA-C/ESYT1/AUP1/SELENOS/EMC8/BCAP31/ZMPSTE24/HLA-DRA	29
GO:0030134	COPII-coated ER to Golgi transport vesicle	21/1339	93/19659	8.71207e-07	1.63787e-05	1.29961e-05	TMED9/LMAN2/TEX261/ERGIC3/TMED2/SEC24D/TMED4/B2M/HLA-B/HLA-A/TMED10/LMAN2L/CTSC/HLA-C/LMAN1/SERPINA1/TMED5/SEC13/TMED3/HLA-DRA/CTSZ	21
GO:0000922	spindle pole	28/1339	154/19659	1.62413e-06	2.96854e-05	2.35546e-05	AURKA/CCNB1/HAUS1/NEK6/NEDD1/CDC20/DSN1/HAUS8/TACC3/CEP89/CDC6/DLGAP5/TBCCD1/PLK1/NUP62/LATS2/POC1A/ODF2/PSRC1/TPX2/BOD1/PRC1/SGO1/ANKRD53/RASSF1/AURKB/RAE1/MAD2L1	28
GO:0000940	condensed chromosome outer kinetochore	7/1339	12/19659	3.91206e-06	6.95712e-05	5.52029e-05	CCNB1/SKA1/PLK1/BUB1/NDC80/BOD1/SKA3	7
GO:0090734	site of DNA damage	16/1339	66/19659	6.50095e-06	0.000112569	8.93205e-05	RBBP8/HUS1/ACTR3/RPA3/ARPC1A/ARPC5/PARP9/RFWD3/ARPC2/CBX3/SMARCAL1/RAD51/WDR76/RPA1/H2AFX/RAD18	16
GO:0005774	vacuolar membrane	51/1339	397/19659	9.19239e-06	0.000153381	0.000121704	RPN2/DDOST/CMTM6/TM9SF1/CD63/CKAP4/ANXA2/SURF4/GNB2/TMEM8A/ATRAID/NCSTN/RAP1B/CTSA/GLMP/SPPL2A/MAN2B1/GNAI3/ATP6V1C2/TMEM165/CCZ1/BRI3/MAGT1/TMEM179B/COL6A1/CD164/ECE1/VMP1/DTX3L/STARD3NL/ABCC3/SH3GLB1/MIOS/ATP6V1G2/MAP1LC3C/SLC35F6/ABCD1/ENPEP/PQLC2/LAPTM4A/WDR41/CTNS/SEC13/TCIRG1/KXD1/NEU1/SNAPIN/LAMTOR2/WIPI1/HLA-DRA/ACP2	51
GO:0051233	spindle midzone	11/1339	34/19659	9.32409e-06	0.000153381	0.000121704	AURKA/KIF18A/CDCA8/CDC6/PLK1/CDC42/RACGAP1/CENPE/KIF14/RCC2/AURKB	11
GO:1904813	ficolin-1-rich granule lumen	23/1339	124/19659	9.56707e-06	0.00015354	0.00012183	GUSB/PSMC2/CANT1/GLB1/PRDX4/PYGL/PGM2/PSMA2/GNS/IDH1/PPIA/ARPC5/MMP9/CTSB/CSTB/TNFAIP6/PNP/PSMA5/COTL1/GSDMD/SERPINA1/NME2/CTSZ	23
GO:0030667	secretory granule membrane	41/1339	295/19659	1.05233e-05	0.000162346	0.000128817	DDOST/CMTM6/CD63/SLC30A5/CKAP4/SURF4/NCSTN/RAP1B/TMED2/PLAU/RAP2B/ADGRE5/IQGAP1/COPB1/BRI3/PLAUR/CD58/MAGT1/TMEM179B/NRAS/RAB27A/TMED10/CD93/LGALS3/DIAPH1/ITGB3/DEGS1/IQGAP2/CLEC5A/RHOA/FLOT2/ANO6/MLEC/FCGR2A/TCIRG1/SERPINA5/LAMTOR2/FCER1G/DOK3/SERPINB6/CD44	41
GO:0005876	spindle microtubule	14/1339	54/19659	1.06093e-05	0.000162346	0.000128817	AURKA/KIF18A/KIF4A/SKA1/PLK1/PSRC1/NUSAP1/BOD1/BIRC5/PRC1/CENPE/CDK1/SKA3/AURKB	14
GO:0030894	replisome	10/1339	29/19659	1.25652e-05	0.000187906	0.000149099	PCNA/MCM3/POLD3/RPA3/POLA2/SMARCAL1/POLD1/PRIM2/POLD2/RPA1	10
GO:0000778	condensed nuclear chromosome kinetochore	7/1339	14/19659	1.50113e-05	0.000219499	0.000174166	CCNB1/CENPA/DSN1/PLK1/BUB1/NDC80/NUF2	7
GO:0000780	condensed nuclear chromosome, centromeric region	9/1339	24/19659	1.57385e-05	0.000225129	0.000178634	AURKA/CCNB1/CENPA/DSN1/PLK1/BUB1/NDC80/NUF2/AURKB	9
GO:0070820	tertiary granule	27/1339	164/19659	1.67419e-05	0.000234387	0.00018598	CANT1/PLAU/RAP2B/PTX3/GGH/COPB1/B2M/CD58/TMEM179B/IDH1/NRAS/MMP9/CD93/LGALS3/DIAPH1/CSTB/TNFAIP6/CLEC5A/GSDMD/RHOA/ANO6/LTF/TCIRG1/LAMTOR2/FCER1G/DOK3/SERPINB6	27
GO:0098644	complex of collagen trimers	8/1339	19/19659	1.73878e-05	0.000238358	0.000189131	COL4A2/COL4A1/COL1A2/COL5A2/COL3A1/COL1A1/COL5A1/LUM	8
GO:0000502	proteasome complex	15/1339	65/19659	2.37044e-05	0.000318316	0.000252575	PSMC2/PSMA2/PSMA7/PSMC4/PSMB8/PSMD9/HSPB1/PSMA5/PSMB9/PSMA1/UBE3C/PSMB2/PSMD8/PSMB4/PSMG3	15
GO:1905369	endopeptidase complex	15/1339	66/19659	2.87642e-05	0.000378537	0.000300359	PSMC2/PSMA2/PSMA7/PSMC4/PSMB8/PSMD9/HSPB1/PSMA5/PSMB9/PSMA1/UBE3C/PSMB2/PSMD8/PSMB4/PSMG3	15
GO:0043601	nuclear replisome	9/1339	26/19659	3.32117e-05	0.000412595	0.000327383	MCM3/POLD3/RPA3/POLA2/SMARCAL1/POLD1/PRIM2/POLD2/RPA1	9
GO:0005583	fibrillar collagen trimer	6/1339	11/19659	3.38604e-05	0.000412595	0.000327383	COL1A2/COL5A2/COL3A1/COL1A1/COL5A1/LUM	6
GO:0034663	endoplasmic reticulum chaperone complex	6/1339	11/19659	3.38604e-05	0.000412595	0.000327383	PDIA6/P4HB/HSPA5/PPIB/HSP90B1/SDF2L1	6
GO:0098643	banded collagen fibril	6/1339	11/19659	3.38604e-05	0.000412595	0.000327383	COL1A2/COL5A2/COL3A1/COL1A1/COL5A1/LUM	6
GO:0005635	nuclear envelope	55/1339	461/19659	3.54147e-05	0.000423689	0.000336186	CALR/CLIC1/NUP37/CMTM3/LRRC59/TOR1B/NRM/NUP205/NEMP1/ATRAID/DPY19L1/BAX/SHISA5/NXT1/DTX2/NUP54/NEMP2/TMEM43/MYO1C/IPO4/ZC3HC1/MLX/SLC16A3/NUP85/LMNA/UBE2I/RAN/CBX3/EIF5AL1/DNAJC2/NUP62/S100A6/TUBB/SDCBP/TOR1A/TMEM109/LMNB1/LMNB2/CERS2/RAC2/WTAP/AEN/POM121C/GAPDH/CERS5/SEC13/TRA2B/HOXA7/ENY2/RRM1/ZMPSTE24/MYOF/NUDT1/RAE1/MAD2L1	55
GO:0005839	proteasome core complex	8/1339	21/19659	4.13949e-05	0.00048639	0.000385937	PSMA2/PSMA7/PSMB8/PSMA5/PSMB9/PSMA1/PSMB2/PSMB4	8
GO:0072686	mitotic spindle	19/1339	101/19659	4.54032e-05	0.000524128	0.000415881	HDAC3/AURKA/KIF18A/TACC3/KIF23/ECT2/CAPG/NUP62/DIAPH1/CDC42/NUSAP1/TPX2/RACGAP1/CENPE/CDK1/RCC2/AURKB/RAE1/MAD2L1	19
GO:0045121	membrane raft	40/1339	304/19659	4.79223e-05	0.00054367	0.000431388	SERPINH1/RIPK1/CASP3/ANXA2/FADD/ITGB1/EFNB1/PDPN/RAP2B/PLSCR1/CASP8/CAVIN1/KIF18A/TNFRSF1A/BCL10/GNAI3/IQGAP1/MYO1C/HYAL2/CTNNA1/SMO/EHD2/TUBB/RGS19/TRPM8/SDCBP/ATP1B3/SLC22A6/TRADD/FLOT2/HMOX1/LAMTOR2/TGFBR1/CFLAR/TUBA1B/KCNE3/MYOF/PGK1/GPC1/UNC5A	40
GO:0098857	membrane microdomain	40/1339	305/19659	5.16129e-05	0.000575615	0.000456735	SERPINH1/RIPK1/CASP3/ANXA2/FADD/ITGB1/EFNB1/PDPN/RAP2B/PLSCR1/CASP8/CAVIN1/KIF18A/TNFRSF1A/BCL10/GNAI3/IQGAP1/MYO1C/HYAL2/CTNNA1/SMO/EHD2/TUBB/RGS19/TRPM8/SDCBP/ATP1B3/SLC22A6/TRADD/FLOT2/HMOX1/LAMTOR2/TGFBR1/CFLAR/TUBA1B/KCNE3/MYOF/PGK1/GPC1/UNC5A	40
GO:0098589	membrane region	41/1339	316/19659	5.353e-05	0.000587046	0.000465805	SERPINH1/RIPK1/CASP3/ANXA2/FADD/ITGB1/EFNB1/PDPN/RAP2B/PLSCR1/CASP8/CAVIN1/KIF18A/TNFRSF1A/BCL10/GNAI3/IQGAP1/MYO1C/HYAL2/CTNNA1/SMO/EHD2/NUP62/TUBB/RGS19/TRPM8/SDCBP/ATP1B3/SLC22A6/TRADD/FLOT2/HMOX1/LAMTOR2/TGFBR1/CFLAR/TUBA1B/KCNE3/MYOF/PGK1/GPC1/UNC5A	41
GO:0005798	Golgi-associated vesicle	27/1339	175/19659	5.44338e-05	0.000587171	0.000465904	TMED9/LMAN2/KDELR1/RAB8A/TEX261/ERGIC3/TMED2/SEC24D/TMED4/SPPL2A/NUCB1/COPB1/B2M/HLA-B/HLA-A/TMED10/LMAN2L/CTSC/COPB2/HLA-C/LMAN1/SERPINA1/TMED5/SEC13/TMED3/HLA-DRA/CTSZ	27
GO:0030867	rough endoplasmic reticulum membrane	9/1339	28/19659	6.48412e-05	0.000688154	0.000546032	PLOD3/SEC61A1/PLOD1/DERL2/SRPRA/SEC61B/RP9/PLOD2/BCAP31	9
GO:0000781	chromosome, telomeric region	25/1339	158/19659	6.65881e-05	0.000695476	0.000551841	CDK2/PCNA/HAT1/MCM3/MCM2/MCM5/MCM6/CHEK2/PPP1CA/CHEK1/DCLRE1B/LRWD1/ORC5/CBX3/POLD1/RAD51/ORC1/SP100/POT1/ALYREF/RPA1/H2AFX/H2AFY/CDK1/PPP1CB	25
GO:0005765	lysosomal membrane	43/1339	344/19659	8.535e-05	0.000877505	0.000696276	DDOST/CMTM6/TM9SF1/CD63/CKAP4/ANXA2/SURF4/GNB2/TMEM8A/ATRAID/NCSTN/RAP1B/CTSA/GLMP/SPPL2A/GNAI3/ATP6V1C2/TMEM165/CCZ1/BRI3/MAGT1/TMEM179B/COL6A1/CD164/ECE1/DTX3L/STARD3NL/MIOS/SLC35F6/ABCD1/ENPEP/PQLC2/LAPTM4A/WDR41/CTNS/SEC13/TCIRG1/KXD1/NEU1/SNAPIN/LAMTOR2/HLA-DRA/ACP2	43
GO:0098852	lytic vacuole membrane	43/1339	345/19659	9.12352e-05	0.000923581	0.000732837	DDOST/CMTM6/TM9SF1/CD63/CKAP4/ANXA2/SURF4/GNB2/TMEM8A/ATRAID/NCSTN/RAP1B/CTSA/GLMP/SPPL2A/GNAI3/ATP6V1C2/TMEM165/CCZ1/BRI3/MAGT1/TMEM179B/COL6A1/CD164/ECE1/DTX3L/STARD3NL/MIOS/SLC35F6/ABCD1/ENPEP/PQLC2/LAPTM4A/WDR41/CTNS/SEC13/TCIRG1/KXD1/NEU1/SNAPIN/LAMTOR2/HLA-DRA/ACP2	43
GO:0031252	cell leading edge	47/1339	390/19659	0.000100371	0.00100067	0.000794005	ANXA2/ITGB1/VASP/TNFRSF12A/ITGA5/S100A11/ACTR3/PDPN/ARAP3/VIM/ARF4/KIF18A/IQGAP1/MYO1C/ARPC5/NRBP1/CTNNA1/PLEK2/ARF6/ARPC2/PALLD/PDLIM7/KCNB1/DIAPH1/S100A6/ITGB3/TWF2/IQGAP2/SPRY2/ILK/GABRG1/ACTN1/PXN/RAC2/CXCR4/RHOA/FLOT2/STX2/AJUBA/MYO1G/SWAP70/SHISA7/EPS8/CD44/EPHA2/NME2/UNC5A	47
GO:1905368	peptidase complex	17/1339	91/19659	0.000122787	0.00120588	0.000956833	PSMC2/PSMA2/PSMA7/TAF12/PSMC4/PSMB8/PSMD9/HSPB1/PSMA5/PSMB9/PSMA1/UBE3C/PSMB2/PSMD8/ENY2/PSMB4/PSMG3	17
GO:0000794	condensed nuclear chromosome	18/1339	100/19659	0.000129139	0.00124961	0.000991535	HUS1/AURKA/CCNB1/CHEK1/CENPA/P3H4/DSN1/UBE2I/BRCA1/PLK1/BUB1/RAD51/NDC80/NUF2/NCAPH/H2AFX/MLH1/AURKB	18
GO:0030135	coated vesicle	36/1339	280/19659	0.000178635	0.00170351	0.00135169	TMED9/LMAN2/KDELR1/RAB8A/TEX261/ERGIC3/TMED2/SEC24D/TMED4/PHETA2/COPB1/B2M/HLA-B/HLA-A/SNAP91/ECE1/RAB27A/FZD5/TMED10/LMAN2L/CTSC/RGS19/SH3GL2/COPB2/NECAP2/HLA-C/LMAN1/FZD2/SERPINA1/TMED5/SEC13/BCAP31/WIPI1/TMED3/HLA-DRA/CTSZ	36
GO:0005791	rough endoplasmic reticulum	16/1339	86/19659	0.000202211	0.00190078	0.00150822	PLOD3/RPN2/SEC61A1/TRAM1/PLOD1/RPN1/CKAP4/DERL2/HM13/SRPRA/NUCB1/SEC61B/RP9/PLOD2/TRAM2/BCAP31	16
GO:0005581	collagen trimer	16/1339	87/19659	0.000232355	0.00215337	0.00170864	COL4A2/COL4A1/EMILIN1/COL1A2/COL5A2/LOX/COL6A2/COL6A1/COL3A1/COL1A1/C1QTNF6/EMILIN2/MSR1/COL5A1/LUM/CTHRC1	16
GO:0000784	nuclear chromosome, telomeric region	20/1339	124/19659	0.000264924	0.00242069	0.00192075	PCNA/HAT1/MCM3/MCM2/MCM5/MCM6/PPP1CA/DCLRE1B/ORC5/CBX3/POLD1/RAD51/ORC1/SP100/POT1/ALYREF/RPA1/H2AFY/CDK1/PPP1CB	20
GO:0035861	site of double-strand break	12/1339	55/19659	0.000268556	0.00242069	0.00192075	RBBP8/HUS1/ACTR3/RPA3/ARPC1A/ARPC5/RFWD3/ARPC2/SMARCAL1/RAD51/H2AFX/RAD18	12
GO:0031965	nuclear membrane	37/1339	302/19659	0.000383086	0.00340636	0.00270285	CLIC1/CMTM3/TOR1B/NRM/NUP205/NEMP1/DPY19L1/SHISA5/DTX2/NUP54/NEMP2/TMEM43/IPO4/ZC3HC1/MLX/SLC16A3/NUP85/LMNA/CBX3/DNAJC2/NUP62/SDCBP/TOR1A/TMEM109/LMNB1/LMNB2/CERS2/WTAP/AEN/POM121C/GAPDH/CERS5/TRA2B/HOXA7/ZMPSTE24/MYOF/NUDT1	37
GO:0030027	lamellipodium	26/1339	188/19659	0.000443675	0.00389251	0.0030886	ITGB1/VASP/ACTR3/PDPN/ARAP3/ARPC5/NRBP1/CTNNA1/PLEK2/ARPC2/PALLD/ITGB3/TWF2/IQGAP2/ILK/PXN/RAC2/RHOA/FLOT2/STX2/AJUBA/MYO1G/SWAP70/CD44/EPHA2/NME2	26
GO:0005885	Arp2/3 protein complex	5/1339	11/19659	0.000474958	0.00405873	0.00322049	ACTR3/ARPC1A/ARPC5/ARPC2/ARPC1B	5
GO:0042555	MCM complex	5/1339	11/19659	0.000474958	0.00405873	0.00322049	MCM3/MCM2/MCM5/MCM6/MCM8	5
GO:0042581	specific granule	23/1339	160/19659	0.000534833	0.0044005	0.00349168	CANT1/CMTM6/CKAP4/PLAU/RAP2B/ERP44/PTX3/GGH/B2M/PLAUR/CHI3L1/RAB27A/CD93/DEGS1/CLEC5A/GSDMD/NFKB1/ANO6/MLEC/LTF/NEU1/LAMTOR2/CTSZ	23
GO:0071556	integral component of lumenal side of endoplasmic reticulum membrane	8/1339	29/19659	0.000535015	0.0044005	0.00349168	CALR/HM13/SPPL2A/HLA-B/HLA-A/HLA-C/BCAP31/HLA-DRA	8
GO:0098553	lumenal side of endoplasmic reticulum membrane	8/1339	29/19659	0.000535015	0.0044005	0.00349168	CALR/HM13/SPPL2A/HLA-B/HLA-A/HLA-C/BCAP31/HLA-DRA	8
GO:0015629	actin cytoskeleton	52/1339	483/19659	0.000714681	0.00580568	0.00460665	ZYX/CALD1/PTPN12/TPM4/VASP/ACTR3/CAPZA1/MYL12A/FLNA/ANXA1/ACTB/ALG2/IQGAP1/NOX4/ACTN4/ARPC1A/MYO1C/CNN3/CLIC4/WDR1/ARPC5/MYL6/CTNNA1/FHL3/ARPC2/PALLD/FBLIM1/PDLIM7/CAPG/GNG12/AFAP1L1/DENND2A/TAX1BP3/ACTG1/TWF2/IQGAP2/LSP1/CAPZA2/ARPC1B/ILK/GBP1/GAS2L3/ACTN1/PXN/RAC2/HFE/TPM3/FLOT2/PLS3/SH3PXD2B/MYO1G/CAP1	52
GO:0035580	specific granule lumen	12/1339	62/19659	0.000850489	0.00682465	0.00541518	CANT1/ERP44/PTX3/GGH/B2M/CHI3L1/RAB27A/GSDMD/NFKB1/LTF/NEU1/CTSZ	12
GO:0001726	ruffle	23/1339	167/19659	0.000976754	0.00774343	0.0061442	ANXA2/ITGB1/TNFRSF12A/ITGA5/S100A11/PDPN/ARAP3/ARF4/KIF18A/IQGAP1/MYO1C/ARF6/PALLD/PDLIM7/DIAPH1/S100A6/ITGB3/SPRY2/ACTN1/RHOA/EPS8/EPHA2/NME2	23
GO:0005874	microtubule	45/1339	414/19659	0.00130182	0.0101976	0.00809154	TUBA1C/TMEM214/REEP4/AURKA/HAUS1/KIF18A/BCL10/IQGAP1/NEK6/KIF4A/TUBB6/SRPRB/KIF2C/HAUS8/KIF23/KIF20A/SKA1/PLK1/TUBB/ODF2/MAP1LC3C/PSRC1/ZNF207/NUSAP1/TPX2/EML4/BOD1/SPRY2/GTSE1/BIRC5/TBCA/DNM3/GAS2L3/PRC1/RACGAP1/CENPE/SLAIN2/SELENOS/KIF14/CDK1/TUBA1B/RASSF1/RCC2/SKA3/AURKB	45
GO:0032432	actin filament bundle	12/1339	67/19659	0.00172464	0.0133507	0.0105934	ZYX/TPM4/NOX4/ACTN4/FHL3/FBLIM1/PDLIM7/ILK/ACTN1/PXN/TPM3/PLS3	12
GO:0045335	phagocytic vesicle	18/1339	124/19659	0.00183935	0.0140732	0.0111667	CALR/ZYX/RAB8A/PDIA3/VIM/B2M/MYO1C/HLA-B/HLA-A/RAB32/RAB34/TAP1/ACTG1/HLA-C/RAC2/ATP6V0E1/LTF/TCIRG1	18
GO:0001725	stress fiber	11/1339	59/19659	0.00189709	0.0141851	0.0112555	ZYX/TPM4/NOX4/ACTN4/FHL3/FBLIM1/PDLIM7/ILK/ACTN1/PXN/TPM3	11
GO:0097517	contractile actin filament bundle	11/1339	59/19659	0.00189709	0.0141851	0.0112555	ZYX/TPM4/NOX4/ACTN4/FHL3/FBLIM1/PDLIM7/ILK/ACTN1/PXN/TPM3	11
GO:0090543	Flemming body	7/1339	28/19659	0.00222773	0.0164701	0.0130686	CEP55/KIF23/ARF6/CAPG/NUP62/RACGAP1/KIF14	7
GO:0005643	nuclear pore	14/1339	88/19659	0.00240569	0.0175883	0.0139558	NUP37/NUP205/NXT1/NUP54/MYO1C/NUP85/RAN/EIF5AL1/NUP62/POM121C/SEC13/ENY2/RAE1/MAD2L1	14
GO:0101003	ficolin-1-rich granule membrane	11/1339	61/19659	0.00250219	0.0180927	0.0143561	COPB1/CD58/TMEM179B/CD93/LGALS3/DIAPH1/RHOA/TCIRG1/FCER1G/DOK3/SERPINB6	11
GO:0031258	lamellipodium membrane	6/1339	22/19659	0.00285505	0.020276	0.0160884	VASP/PDPN/PLEK2/ITGB3/CD44/EPHA2	6
GO:0042641	actomyosin	12/1339	71/19659	0.00286575	0.020276	0.0160884	ZYX/TPM4/NOX4/ACTN4/WDR1/FHL3/FBLIM1/PDLIM7/ILK/ACTN1/PXN/TPM3	12
GO:0030670	phagocytic vesicle membrane	12/1339	72/19659	0.00323039	0.0226128	0.0179426	CALR/RAB8A/B2M/HLA-B/HLA-A/RAB32/RAB34/TAP1/HLA-C/RAC2/ATP6V0E1/TCIRG1	12
GO:0071437	invadopodium	5/1339	16/19659	0.00337039	0.0233444	0.0185232	MSN/ITGB1/PDPN/PLAUR/AFAP1L1	5
GO:1904724	tertiary granule lumen	10/1339	55/19659	0.00363754	0.0249323	0.0197831	CANT1/PTX3/GGH/B2M/IDH1/MMP9/CSTB/TNFAIP6/GSDMD/LTF	10
GO:0031985	Golgi cisterna	16/1339	113/19659	0.0041254	0.0279847	0.0222051	CHPF2/CANT1/GAL3ST4/GALNT2/APH1A/TMED2/NUCB1/RAB34/CHPF/YIPF1/YIPF2/CHSY1/BCAP31/NSG2/TMED3/FUT9	16
GO:0000932	P-body	13/1339	84/19659	0.00432107	0.0290129	0.023021	PSMC2/PSMA2/APOBEC3C/DCPS/TRIM5/TRIM21/CARHSP1/POLR2D/APOBEC3F/MOV10/APOBEC3G/AJUBA/APOBEC3D	13
GO:0005795	Golgi stack	19/1339	145/19659	0.00452975	0.0301068	0.023889	CHPF2/CANT1/GAL3ST4/GALNT2/APH1A/TMED2/MGAT2/NUCB1/RAB34/CHPF/YIPF1/YIPF2/CHSY1/PLK3/TMBIM4/BCAP31/NSG2/TMED3/FUT9	19
GO:0030137	COPI-coated vesicle	6/1339	24/19659	0.00458154	0.0301466	0.0239205	KDELR1/TMED2/COPB1/TMED10/COPB2/TMED3	6
GO:0019774	proteasome core complex, beta-subunit complex	4/1339	11/19659	0.00479719	0.031253	0.0247984	PSMB8/PSMB9/PSMB2/PSMB4	4
GO:0000792	heterochromatin	12/1339	76/19659	0.00508117	0.0327785	0.0260089	MBD2/CENPA/UBE2A/LRWD1/HDAC1/CBX3/PHC2/WDR76/DNMT3A/HMGA2/H2AFZ/H2AFY	12
GO:0005637	nuclear inner membrane	10/1339	58/19659	0.00539519	0.034135	0.0270852	NRM/NEMP1/DPY19L1/NEMP2/TMEM43/CBX3/LMNB1/LMNB2/TRA2B/ZMPSTE24	10
GO:0035577	azurophil granule membrane	10/1339	58/19659	0.00539519	0.034135	0.0270852	DDOST/CMTM6/CD63/CKAP4/SURF4/NCSTN/RAP1B/BRI3/MAGT1/TMEM179B	10
GO:0042611	MHC protein complex	6/1339	25/19659	0.00568655	0.0356357	0.028276	B2M/HLA-B/HLA-A/HLA-C/MR1/HLA-DRA	6
GO:0030663	COPI-coated vesicle membrane	5/1339	18/19659	0.00589889	0.0366176	0.0290551	KDELR1/TMED2/COPB1/COPB2/TMED3	5
GO:0005884	actin filament	14/1339	99/19659	0.00710212	0.0436747	0.0346547	TPM4/FLNA/ANXA1/IQGAP1/MYO1C/WDR1/PALLD/GNG12/ACTG1/TWF2/ACTN1/RAC2/TPM3/PLS3	14
GO:0036464	cytoplasmic ribonucleoprotein granule	24/1339	207/19659	0.00749545	0.0456667	0.0362353	PSMC2/CKAP4/PSMA2/ACTB/APOBEC3C/IQGAP1/DCPS/DYRK3/TRIM5/TRIM21/SOCS1/GABPB1/CARHSP1/TUBB/CDC42/POLR2D/MAP1LC3C/APOBEC3F/MOV10/APOBEC3G/G3BP1/AJUBA/APOBEC3D/HOXD10	24
GO:0030666	endocytic vesicle membrane	20/1339	163/19659	0.0076061	0.0459157	0.0364329	CALR/RAB8A/B2M/HLA-B/HLA-A/RAB32/SMO/RAB34/MSR1/FZD5/TAP1/SH3GL2/HLA-C/RAC2/FZD2/ATP6V0E1/CACNG2/TCIRG1/UBC/HLA-DRA	20
GO:0030660	Golgi-associated vesicle membrane	15/1339	111/19659	0.00826954	0.0494669	0.0392506	KDELR1/TMED2/SEC24D/SPPL2A/COPB1/B2M/HLA-B/HLA-A/TMED10/COPB2/HLA-C/LMAN1/SEC13/TMED3/HLA-DRA	15

## Sheet: MF terms
Sheet 3. 40 terms of molecular function (MF)
ID	Description	GeneRatio	BgRatio	pvalue	p.adjust	qvalue	geneID	Count
GO:0016757	transferase activity, transferring glycosyl groups	50/1285	272/17632	1.0116e-09	9.98445e-07	9.08307e-07	PLOD3/COLGALT1/RPN2/DDOST/CHPF2/ALG3/OSTC/STT3A/HEXB/POFUT1/RPN1/EXT2/KDELC2/PYGL/DPAGT1/GALNT2/DPY19L1/MGAT2/ALG8/MGAT4B/NAMPT/C1GALT1C1/ALG2/UMPS/MAGT1/MGAT1/UPP1/PARP9/ALG6/ALG12/HEXA/GLT8D1/QTRT2/PIGC/CHPF/GALNT5/PARP12/PNP/B3GNT5/GBE1/KDELC1/B3GALNT2/GYS1/RXYLT1/TYMP/ALG1/CHSY1/DPM1/ST8SIA4/FUT9	50
GO:0005201	extracellular matrix structural constituent	33/1285	155/17632	1.82119e-08	8.98756e-06	8.17618e-06	LAMC1/COL4A2/COL4A1/PCOLCE/EMILIN1/FN1/COL1A2/BGN/COL5A2/COL6A2/HSPG2/COL6A1/COL3A1/EFEMP2/CHI3L1/COL1A1/EMILIN2/TNC/IGFBP7/ELN/LAMB2/FMOD/COL5A1/TGFBI/LAMA4/LAMB1/POSTN/MXRA5/LUM/NID2/CTHRC1/NID1/AEBP1	33
GO:0016758	transferase activity, transferring hexosyl groups	39/1285	206/17632	3.01961e-08	9.93452e-06	9.03765e-06	PLOD3/COLGALT1/RPN2/DDOST/CHPF2/ALG3/OSTC/STT3A/HEXB/POFUT1/RPN1/EXT2/KDELC2/PYGL/GALNT2/DPY19L1/MGAT2/ALG8/MGAT4B/C1GALT1C1/ALG2/MAGT1/MGAT1/ALG6/ALG12/HEXA/PIGC/CHPF/GALNT5/B3GNT5/GBE1/KDELC1/B3GALNT2/GYS1/TYMP/ALG1/CHSY1/DPM1/FUT9	39
GO:0050839	cell adhesion molecule binding	68/1285	486/17632	1.42943e-07	3.52712e-05	3.2087e-05	P4HB/CALR/HSPA5/CALD1/TAGLN2/CLIC1/MMP14/PFN1/CD151/MSN/ANXA2/LRRC59/BZW1/ITGB1/VASP/RARS/ITGA5/S100A11/EMILIN1/CAPZA1/FN1/FLNA/NECTIN2/ANXA1/TSPAN4/EHD4/IQGAP1/YKT6/UNC45A/ACTN4/PPP1CA/CNN3/ADAM9/IDH1/COL3A1/PTPN2/CTNNA1/LDHA/CAST/RUVBL1/STK38/RAN/ARHGAP18/F11R/SH3GLB1/LAMB2/CAPG/PDLIM1/COL5A1/ITGB3/TGFBI/CCNB2/TES/ITGA4/TWF2/CTNNAL1/ILK/PTPRT/CDH18/PTPN1/ACTN1/PXN/POSTN/ZC3HAV1/ICAM3/PAICS/SWAP…	68
GO:0002020	protease binding	26/1285	125/17632	9.27135e-07	0.000183016	0.000166494	CASP3/ANXA2/FADD/TIMP1/ITGB1/ANXA2P2/FN1/COL1A2/BCL10/COL3A1/BFAR/COL1A1/CAST/ADAMTSL4/CSTB/ITGB3/RIOK3/SERPINE1/FLOT2/SERPINA1/CARD16/SERPINA5/SELENOS/CFLAR/UBC/SERPINB6	26
GO:0097153	cysteine-type endopeptidase activity involved in apoptotic process	8/1285	15/17632	3.1528e-06	0.000518635	0.000471813	CASP2/CASP3/CASP6/CASP4/CASP8/CASP7/CFLAR/CASP1	8
GO:0005518	collagen binding	17/1285	67/17632	4.24785e-06	0.000598947	0.000544874	SERPINH1/PPIB/P3H1/MRC2/ITGB1/PCOLCE/FN1/ADAM9/MMP9/CTSB/TGFBI/CTSL/LUM/NID2/NID1/CD44/AEBP1	17
GO:0050840	extracellular matrix binding	15/1285	56/17632	7.54588e-06	0.000930973	0.000846926	ANXA2/ITGB1/ANXA2P2/CD248/BGN/ADAM9/LGALS1/VEGFA/LGALS3/OLFML2A/ITGB3/TGFBI/NID1/GPC1/SPP1	15
GO:0004576	oligosaccharyl transferase activity	6/1285	10/17632	2.4088e-05	0.00237748	0.00216284	RPN2/DDOST/OSTC/STT3A/RPN1/MAGT1	6
GO:0005338	nucleotide-sugar transmembrane transporter activity	6/1285	10/17632	2.4088e-05	0.00237748	0.00216284	SLC35A2/SLC35A4/SLC35C1/SLC35B1/SLC35D1/SLC35D2	6
GO:0140097	catalytic activity, acting on DNA	30/1285	185/17632	2.86298e-05	0.00256888	0.00233696	PCNA/APEX2/MGME1/GINS4/RBBP8/POLD3/MCM6/DCLRE1B/POLA2/ERCC6L/RUVBL1/GINS2/GINS1/SMARCAL1/POLD1/RAD51/RECQL/RAD54B/POLE2/UNG/DKC1/POLD2/DNMT3A/ISG20/EXO1/NEIL3/RAD54L/HMGA2/G3BP1/CDC45	30
GO:0045296	cadherin binding	44/1285	323/17632	4.3284e-05	0.00350493	0.00318851	HSPA5/CALD1/TAGLN2/CLIC1/PFN1/ANXA2/LRRC59/BZW1/ITGB1/VASP/RARS/S100A11/CAPZA1/FLNA/ANXA1/EHD4/IQGAP1/YKT6/UNC45A/PPP1CA/CNN3/IDH1/CTNNA1/LDHA/CAST/RUVBL1/STK38/RAN/ARHGAP18/F11R/SH3GLB1/CAPG/PDLIM1/CCNB2/TES/TWF2/CTNNAL1/PTPRT/CDH18/PTPN1/ZC3HAV1/PAICS/SWAP70/EPHA2	44
GO:0019864	IgG binding	6/1285	11/17632	4.97154e-05	0.00350493	0.00318851	FCGRT/FCGR2C/FCGR2A/FCER1G/FCGR3A/FCGR2B	6
GO:0048407	platelet-derived growth factor binding	6/1285	11/17632	4.97154e-05	0.00350493	0.00318851	COL4A1/COL1A2/COL6A1/COL3A1/COL1A1/COL5A1	6
GO:0004298	threonine-type endopeptidase activity	8/1285	21/17632	6.70912e-05	0.00413869	0.00376505	PSMA2/PSMA7/PSMB8/PSMA5/PSMB9/PSMA1/PSMB2/PSMB4	8
GO:0070003	threonine-type peptidase activity	8/1285	21/17632	6.70912e-05	0.00413869	0.00376505	PSMA2/PSMA7/PSMB8/PSMA5/PSMB9/PSMA1/PSMB2/PSMB4	8
GO:0003688	DNA replication origin binding	7/1285	17/17632	0.000108948	0.00593496	0.00539915	MCM2/MCM5/GRWD1/CDC6/ORC5/ORC1/CDC45	7
GO:0035173	histone kinase activity	7/1285	17/17632	0.000108948	0.00593496	0.00539915	CDK2/AURKA/CCNB1/CHEK1/HASPIN/CDK1/AURKB	7
GO:0016798	hydrolase activity, acting on glycosyl bonds	21/1285	118/17632	0.000114249	0.00593496	0.00539915	GUSB/EDEM2/GLA/GLB1/PCNA/HEXB/GANAB/CTSA/MAN2B1/HYAL2/NAGA/ADPRH/HEXA/FUCA2/UNG/GBE1/ADPRHL2/HPSE2/NEIL3/MOGS/NEU1	21
GO:0019838	growth factor binding	23/1285	137/17632	0.000138592	0.00683954	0.00622207	IGFBP2/SHC1/COL4A1/COL1A2/TWSG1/SRPX2/SEC61B/COL6A1/HYAL2/ENG/COL3A1/NRP1/COL1A1/IGFBP7/HTRA3/COL5A1/ITGB3/IGFBP4/OSMR/PTN/TGFBR1/GPC1/IGFBP5	23
GO:0016667	oxidoreductase activity, acting on a sulfur group of donors	13/1285	58/17632	0.00022058	0.0103673	0.00943131	PDIA6/P4HB/GSTK1/PDIA5/IFI30/PDIA3/TXNDC12/TMX1/TXNDC17/SUMF1/SQOR/SH3BGRL3/PGK1	13
GO:0005178	integrin binding	21/1285	126/17632	0.000294462	0.0132106	0.012018	P4HB/CALR/MMP14/CD151/ITGB1/ITGA5/EMILIN1/FN1/TSPAN4/ACTN4/ADAM9/COL3A1/PTPN2/LAMB2/COL5A1/ITGB3/TGFBI/ILK/ACTN1/PXN/ICAM3	21
GO:0003684	damaged DNA binding	14/1285	69/17632	0.000386371	0.0165804	0.0150835	PCNA/RBBP8/RPA3/DDB2/DCLRE1B/BRCA1/HMGB2/POLD1/UNG/POT1/NEIL3/RPA1/H2AFX/RAD18	14
GO:0015036	disulfide oxidoreductase activity	10/1285	40/17632	0.000458712	0.0183168	0.0166632	PDIA6/P4HB/GSTK1/PDIA5/PDIA3/TXNDC12/TMX1/TXNDC17/SH3BGRL3/PGK1	10
GO:0004553	hydrolase activity, hydrolyzing O-glycosyl compounds	17/1285	95/17632	0.000463952	0.0183168	0.0166632	GUSB/EDEM2/GLA/GLB1/HEXB/GANAB/CTSA/MAN2B1/HYAL2/NAGA/HEXA/FUCA2/GBE1/ADPRHL2/HPSE2/MOGS/NEU1	17
GO:0003697	single-stranded DNA binding	18/1285	105/17632	0.000548568	0.0208245	0.0189445	SMC4/SSBP1/RBBP8/RPA3/ANXA1/MCM6/RBMS1/HMGB2/PRIM2/RAD51AP1/RAD51/POLR2D/POT1/NEIL3/RPA1/MLH1/CDC45/POLR3C	18
GO:0046527	glucosyltransferase activity	6/1285	16/17632	0.000627089	0.0229236	0.0208541	PLOD3/KDELC2/ALG8/ALG6/KDELC1/GYS1	6
GO:0003756	protein disulfide isomerase activity	6/1285	17/17632	0.00090971	0.0296738	0.0269949	PDIA6/P4HB/PDIA5/PDIA3/ERP44/ITGB3	6
GO:0005123	death receptor binding	6/1285	17/17632	0.00090971	0.0296738	0.0269949	RIPK1/CASP3/FADD/MYD88/CASP8/CFLAR	6
GO:0016864	intramolecular oxidoreductase activity, transposing S-S bonds	6/1285	17/17632	0.00090971	0.0296738	0.0269949	PDIA6/P4HB/PDIA5/PDIA3/ERP44/ITGB3	6
GO:0019865	immunoglobulin binding	7/1285	23/17632	0.000932003	0.0296738	0.0269949	LGALS3/FCGRT/FCGR2C/FCGR2A/FCER1G/FCGR3A/FCGR2B	7
GO:0004126	cytidine deaminase activity	5/1285	12/17632	0.0010469	0.0322904	0.0293753	APOBEC3C/APOBEC3B/APOBEC3F/APOBEC3G/APOBEC3D	5
GO:0030020	extracellular matrix structural constituent conferring tensile strength	9/1285	37/17632	0.00108588	0.0324776	0.0295456	COL4A2/COL4A1/COL1A2/COL5A2/COL6A2/COL6A1/COL3A1/COL1A1/COL5A1	9
GO:0000030	mannosyltransferase activity	7/1285	24/17632	0.00123379	0.0358162	0.0325828	ALG3/DPY19L1/ALG8/ALG2/ALG12/ALG1/DPM1	7
GO:0004386	helicase activity	22/1285	151/17632	0.00139905	0.0394531	0.0358913	GINS4/MCM3/MCM2/MCM5/MCM6/ERCC6L/RUVBL1/GINS2/DDX39A/GINS1/EIF4A3/SMARCAL1/RECQL/RAD54B/TTF2/DDX47/MOV10/RAD54L/DDX56/G3BP1/MCM8/CDC45	22
GO:0001882	nucleoside binding	45/1285	391/17632	0.00155377	0.0425993	0.0387534	TUBA1C/RAB8A/RAB42/RCC1L/RAP1B/RAP2B/ARF4/IFT22/GMPPB/SRPRA/EHD4/GNAI3/GPN1/ACTN4/RHOC/RIT1/TUBB6/RAB32/SRPRB/RAB34/RAN/ARF6/EHD2/NRAS/RAB27A/GNAL/RHOJ/FPGT/TUBB/PNP/CDC42/DAP3/TPX2/DNM3/GBP1/RAC2/RHOA/RASL10A/GNL2/DIRAS3/RP2/TUBA1B/CGAS/GIMAP2/NME2	45
GO:0015932	nucleobase-containing compound transmembrane transporter activity	9/1285	39/17632	0.00162144	0.043253	0.0393482	SLC35A2/SLC35A4/SLC35C1/SLC35B1/SLC25A24/ABCD1/SLC25A19/SLC35D1/SLC35D2	9
GO:0043394	proteoglycan binding	8/1285	32/17632	0.00168791	0.0438411	0.0398832	TNC/CTSB/COL5A1/CTSL/SDCBP/HPSE2/PTN/NID1	8
GO:0098641	cadherin binding involved in cell-cell adhesion	6/1285	19/17632	0.00175781	0.0442847	0.0402867	ANXA2/S100A11/ANXA1/PPP1CA/CNN3/PDLIM1	6
GO:0031492	nucleosomal DNA binding	11/1285	55/17632	0.00179472	0.0442847	0.0402867	ACTL6A/MBD2/ACTB/CENPA/HMGN2/HMGN4/HDAC1/SMARCE1/HMGA2/H2AFZ/H2AFY	11

## Sheet: KEGG terms
Sheet 4. KEGG terms
ID	Description	GeneRatio	BgRatio	pvalue	p.adjust	qvalue	geneID	Count
hsa03030	DNA replication	17/654	36/7959	5.64724e-10	1.71111e-07	1.42073e-07	5982/5111/6742/4172/10714/4171/6119/4174/4175/10535/23649/5424/5558/5427/5425/5984/6117	17
hsa04141	Protein processing in endoplasmic reticulum	38/654	166/7959	3.75416e-09	5.68754e-07	4.72233e-07	10130/5034/811/6185/29927/81567/55741/3309/1650/10960/23471/3703/51726/6184/10970/51009/23193/7184/9871/581/2923/578/7494/10952/64374/6747/55768/3998/23480/8454/7841/6396/118424/55829/10134/6746/51619/6745	38
hsa05170	Human immunodeficiency virus 1 infection	42/654	212/7959	5.21781e-08	5.26998e-06	4.37563e-06	811/8737/7465/836/8772/5606/2783/581/891/4615/2923/841/578/2787/7132/2773/27350/567/1111/3106/3105/85363/51135/4893/55970/6890/57144/9133/9582/3107/200316/4790/5829/5880/60489/7852/8717/8454/983/115004/995/140564	42
hsa04110	Cell cycle	29/654	124/7959	1.66457e-07	1.08945e-05	9.04563e-06	1017/5111/7465/4172/4171/891/4174/4175/11200/1111/991/890/9232/1031/990/5001/3065/5347/699/4998/9133/10926/1874/8454/983/8318/995/1647/4085	29
hsa04510	Focal adhesion	39/654	199/7959	2.13146e-07	1.08945e-05	9.04563e-06	7791/3915/1284/6464/1282/3688/7408/3678/5908/10627/2335/2316/1278/60/1292/81/5499/1291/1277/7422/3371/3913/1729/3690/998/57144/71/3676/3910/3611/87/5829/3912/5880/387/7059/5500/10451/6696	39
hsa00510	N-Glycan biosynthesis	17/654	50/7959	2.15733e-07	1.08945e-05	9.04563e-06	6185/1650/10195/3703/6184/1798/23193/4247/79053/11282/85365/4245/29929/79087/56052/8813/7841	17
hsa05205	Proteoglycans in cancer	39/654	204/7959	4.18991e-07	1.81363e-05	1.50585e-05	967/836/4478/3688/3678/8321/4313/2335/5328/2316/369/1278/60/8826/3339/5329/6382/5499/1277/6774/7422/6608/4893/4318/7855/3690/998/1514/71/5829/60495/2535/387/4060/5500/10451/2817/960/3236	39
hsa03430	Mismatch repair	11/654	23/7959	5.73722e-07	2.17297e-05	1.8042e-05	5982/5111/6742/10714/6119/5424/5425/5984/9156/6117/4292	11
hsa04145	Phagosome	31/654	152/7959	1.57114e-06	4.76931e-05	3.95993e-05	811/29927/84790/9902/3688/3678/60/245973/715/3106/3105/10952/84617/4481/6890/3690/203068/1514/534/71/3107/23480/8992/9103/2212/10312/7059/10376/2214/3122/2213	31
hsa04512	ECM-receptor interaction	22/654	88/7959	1.57403e-06	4.76931e-05	3.95993e-05	3915/1284/1282/3688/3678/2335/1278/1292/3339/6382/1291/1277/3371/3913/3690/3676/3910/3912/3161/7059/960/6696	22
hsa00531	Glycosaminoglycan degradation	9/654	19/7959	7.04363e-06	0.000190571	0.00015823	2990/2720/3074/2588/2799/8692/3073/6448/60495	9
hsa00513	Various types of N-glycan biosynthesis	13/654	39/7959	7.54735e-06	0.000190571	0.00015823	6185/1650/10195/3703/3074/6184/4247/11282/85365/4245/79087/3073/56052	13
hsa04210	Apoptosis	27/654	136/7959	1.24835e-05	0.000290962	0.000241584	84790/8737/835/836/839/8772/581/841/578/60/7132/4000/4893/840/1508/1514/1075/71/4001/332/84823/4790/8717/8837/10376/1522/1647	27
hsa05169	Epstein-Barr virus infection	35/654	201/7959	1.45939e-05	0.000315853	0.000262251	811/5701/8737/1017/836/8772/5606/581/4615/2923/7431/1643/841/578/567/965/3106/3105/890/6774/51135/7979/3065/5704/3455/6890/3107/3627/5971/4790/8717/5714/960/3122/1647	35
hsa05130	Pathogenic Escherichia coli infection	35/654	202/7959	1.63068e-05	0.000323558	0.000268648	84790/8737/836/8772/3688/837/9871/581/4615/841/578/60/7132/10552/4641/84617/10092/10061/51135/382/10109/10972/840/203068/998/71/10095/4790/387/8717/2597/2212/834/10376/64005	35
hsa04142	Lysosome	25/654	123/7959	1.70856e-05	0.000323558	0.000268648	2990/2717/2720/967/3074/2588/5476/2799/9179/4125/4668/8763/3073/6448/285362/10577/1508/1514/1075/9741/1497/10312/4758/53/1522	25
hsa05165	Human papillomavirus infection	48/654	330/7959	5.98414e-05	0.00106658	0.000885578	3915/1017/836/1284/1282/8772/3688/3678/8321/2335/581/1278/841/578/7132/245973/1292/3106/3105/1291/890/182/1277/7422/3371/3065/4893/3659/7855/3913/3455/3690/998/534/3676/3107/3910/4790/5829/3912/2535/8717/8992/10312/7059/10134/64764/6696	48
hsa03440	Homologous recombination	12/654	41/7959	7.30312e-05	0.00122936	0.00102073	6742/5932/10714/6119/672/7979/5424/5888/25788/5425/8438/6117	12
hsa04115	p53 signaling pathway	16/654	72/7959	0.000188948	0.00296782	0.00246416	1017/836/55240/581/891/51246/1643/841/11200/1111/6241/9133/51512/5054/983/1647	16
hsa03050	Proteasome	12/654	45/7959	0.000195895	0.00296782	0.00246416	5701/5683/5688/7979/5704/5696/5686/5698/5682/5690/5714/5692	12
hsa05100	Bacterial invasion of epithelial cells	16/654	73/7959	0.000223947	0.00323124	0.00268287	6464/3688/3678/2335/60/10552/10092/1495/10109/998/71/10095/3611/26052/5829/387	16
hsa04670	Leukocyte transendothelial migration	21/654	112/7959	0.000263544	0.00362972	0.00301373	4478/3688/7408/5908/10627/4313/60/2773/81/1495/50848/4318/998/71/3676/87/5829/5880/7852/387/10451	21
hsa05110	Vibrio cholerae infection	12/654	50/7959	0.000564929	0.00721557	0.00599104	11014/29927/10945/60/245973/11015/10952/534/71/23480/8992/10312	12
hsa04810	Regulation of actin cytoskeleton	32/654	213/7959	0.00057153	0.00721557	0.00599104	5216/4478/3688/3678/10627/2335/369/60/8826/81/10552/5499/10092/4893/10109/55970/1729/3690/998/57144/71/3676/10788/10095/87/5829/5880/7852/387/128239/5500/10451	32
hsa05131	Shigellosis	34/654	236/7959	0.000840441	0.0101861	0.00845749	8737/5216/3688/3678/837/10627/581/4615/60/7132/8915/81/10552/10092/831/10109/11335/1729/998/71/10095/3611/4790/87/5829/387/8717/8454/826/834/115004/55062/51619/960	34
hsa05203	Viral carcinogenesis	30/654	201/7959	0.000937751	0.0109284	0.00907379	1017/836/8841/581/841/578/81/1111/3106/3105/991/890/6774/2961/3065/4893/6672/998/8345/51564/3107/9261/4790/87/5829/387/8717/983/64764/85236	30
hsa04933	AGE-RAGE signaling pathway in diabetic complications	18/654	100/7959	0.00116778	0.0126961	0.0105415	836/1284/1282/4313/2335/581/1278/50507/1281/1277/6774/7422/4893/1729/998/5054/4790/7046	18
hsa05222	Small cell lung cancer	17/654	92/7959	0.00117324	0.0126961	0.0105415	3915/1017/836/1284/1282/3688/2335/581/1643/578/1163/3913/1164/3910/4790/3912/1647	17
hsa00240	Pyrimidine metabolism	12/654	57/7959	0.0019347	0.0202142	0.0167838	124583/1841/1806/7298/7372/7083/7378/6241/4860/1890/6240/4831	12
hsa00511	Other glycan degradation	6/654	18/7959	0.00236489	0.0238854	0.0198319	2720/3074/4125/3073/2519/4758	6
hsa04218	Cellular senescence	24/654	160/7959	0.00274488	0.026829	0.0222759	1017/5606/3364/891/11200/5499/1111/3106/3105/890/678/4893/4605/9133/3107/2305/9261/1874/5054/4790/7046/983/5500/1647	24
hsa05163	Human cytomegalovirus infection	31/654	225/7959	0.002866	0.0271375	0.0225321	811/8737/3588/836/8772/2783/581/2923/841/578/2787/7132/2773/567/3106/3105/6774/7422/4893/55970/6890/3690/3107/4790/5829/5880/7852/387/8717/64764/115004	31
hsa05133	Pertussis	14/654	76/7959	0.00319627	0.0293476	0.0243671	836/3688/3678/4615/2773/715/51135/3659/840/710/4790/387/834/716	14
hsa04215	Apoptosis - multiple species	8/654	32/7959	0.00354968	0.0316339	0.0262655	836/8772/581/841/578/7132/840/332	8
hsa05146	Amoebiasis	17/654	102/7959	0.00369169	0.0319595	0.0265357	3915/836/1284/1282/2335/1278/81/1281/1277/3913/2774/3315/3910/4790/87/3912/5269	17
hsa03460	Fanconi anemia pathway	11/654	54/7959	0.00386585	0.0325376	0.0270158	6119/91442/672/2176/5888/55215/7398/6117/4292/2188/2177	11
hsa03420	Nucleotide excision repair	10/654	47/7959	0.00416239	0.0329927	0.0273936	5982/5111/10714/6119/1643/5424/5427/5425/5984/6117	10
hsa04668	TNF signaling pathway	18/654	112/7959	0.00426958	0.0329927	0.0273936	8737/4323/836/8772/5606/841/602/7132/3976/182/3659/4318/840/3627/4790/8717/8837/64764	18
hsa05145	Toxoplasmosis	18/654	112/7959	0.00426958	0.0329927	0.0273936	3915/3460/3588/836/3688/5606/4615/841/7132/2773/6774/51135/8651/3913/3910/4790/3912/3122	18
hsa03410	Base excision repair	8/654	33/7959	0.00435547	0.0329927	0.0273936	5111/27301/10714/5424/5427/7374/5425/55247	8
hsa00603	Glycosphingolipid biosynthesis - globo and isoglobo series	5/654	15/7959	0.00552284	0.0408151	0.0338886	2717/3074/4668/3073/10690	5
